# Supplementary material for: Visible-light enabled synthesis of cyclopropane-fused indolines via dearomatization of indoles
Source: Royal Society of Chemistry journal article supplement (doi:10.1039/d2qo01174c), 2022-01-01
Supplement: d2qo01174c1.pdf [file d2qo01174c1.pdf]

## **Visible-light enabled synthesis of cyclopropane-fused indolines via dearomatization of indoles**

Xu-Lun Huang,<sup>a,b</sup> Yuan-Zheng Cheng,<sup>a\*</sup> and Shu-Li You<sup>a\*</sup>

<sup>a</sup>State Key Laboratory of Organometallic Chemistry, Shanghai Institute of Organic Chemistry, Chinese Academy of Sciences, 345 Lingling Lu, Shanghai 200032, China.

<sup>b</sup>School of Physical Science and Technology, ShanghaiTech University, 100 Haik Road, Shanghai 201210, China

## Table of Contents

|                                                                                            |     |
|--------------------------------------------------------------------------------------------|-----|
| 1. General Information .....                                                               | S3  |
| 2. General Procedure for the Synthesis of Substrates .....                                 | S4  |
| 3. Detailed Screening of Reaction Conditions .....                                         | S5  |
| 4. General Procedure for Visible-Light Induced Dearomatization of Indole Derivatives ..... | S7  |
| 5. Scale-up Experiment and Transformations of <b>3b</b> , <b>4b</b> and <b>3m</b> .....    | S17 |
| 7. X-Ray Crystal Data of <b>5m</b> .....                                                   | S24 |
| 8. Reference .....                                                                         | S34 |
| 9. Copies of NMR Spectra .....                                                             | S35 |
| 10. Copies of HPLC Spectra.....                                                            | S96 |

## 1. General Information

Unless stated otherwise, all reactions were carried out in flame-dried glassware under a dry argon atmosphere. All solvents were purified and dried according to standard methods prior to use.

$^1\text{H}$  and  $^{13}\text{C}$  NMR spectra were recorded on an Agilent instrument (400 MHz and 100 MHz, respectively) or an Agilent instrument (600 MHz and 150 MHz, respectively) and internally referenced to tetramethylsilane signal or residual protio solvent signals.  $^{19}\text{F}$  NMR spectra were recorded on an Agilent instrument (376 MHz) and referenced relative to  $\text{CFCl}_3$ . Data for  $^1\text{H}$  NMR are recorded as follows: chemical shift ( $\delta$ , ppm), multiplicity (s = singlet, d = doublet, t = triplet, m = multiplet or unresolved, coupling constant(s) in Hz, integration). Data for  $^{13}\text{C}$  NMR are reported in terms of chemical shift ( $\delta$ , ppm). The high resolution mass spectra (HRMS) were recorded on a Bruker Apex IV FTMS instrument or a High-Resolution LC-MS spectrometer Thermo Fisher Exactive. Melting points (m.p.) were determined in open capillaries without further correction.

## 2. General Procedure for the Synthesis of Substrates

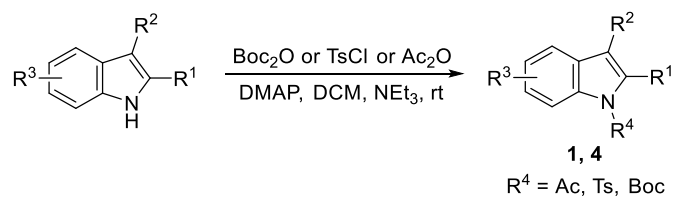

To a solution of *N*-unsubstituted indole derivatives (10 mmol, 1.0 equiv) in DCM (40 mL) was added DMAP (240 mg, 2 mmol, 0.2 equiv) at room temperature under argon. After stirring for 25 minutes, the corresponding acetic anhydride or sulfonyl chloride or di-*tert*-butyl dicarbonate (15 mmol, 1.5 equiv) and triethylamine (3.5 mL, 25 mmol, 2.5 equiv) were added slowly. The reaction was stirred at room temperature overnight. The resulted mixture was quenched with H<sub>2</sub>O, extracted with DCM (25 mL×3), and dried over Na<sub>2</sub>SO<sub>4</sub>. After removal of Na<sub>2</sub>SO<sub>4</sub> by filtration, the organic phase was concentrated *in vacuo* to give a dark residue, which was purified by column chromatography on silica gel (PE/EtOAc = 4/1) to afford the desired indole substrates.

Alkylbis(catecholato)silicate **2** was prepared according to the procedures reported in the literature.<sup>[1]</sup>

### 3. Detailed Screening of Reaction Conditions

**Table S1. Optimization of the Reaction Conditions for 3-Substituted Indoles<sup>a</sup>**

Reaction scheme: 1a + 2  $\xrightarrow[\text{blue LEDs}]{\text{photocatalyst, solvent}}$  3a

Ir(dFCF<sub>3</sub>ppy)<sub>2</sub>(dtbbpy)PF<sub>6</sub> (I)

Ir(dFCF<sub>3</sub>ppy)<sub>2</sub>(bpy)PF<sub>6</sub> (II)

Ir(ppy)<sub>2</sub>(dtbbpy)PF<sub>6</sub> (III)

Ir(ppy)<sub>3</sub> (IV)

Ru(bpy)<sub>3</sub>Cl<sub>2</sub> (V)

Ru(bpy)<sub>3</sub>(PF<sub>6</sub>)<sub>2</sub> (VI)

4-CzIPN (VII)

[Acr-Mes]ClO<sub>4</sub> (VIII)

| entry | photocatalyst | solvent                       | yield (%) (3a) <sup>b</sup> |
|-------|---------------|-------------------------------|-----------------------------|
| 1     | <b>I</b>      | DMSO                          | 92 (86) <sup>c</sup>        |
| 2     | <b>II</b>     | DMSO                          | 10                          |
| 3     | <b>III</b>    | DMSO                          | 0                           |
| 4     | <b>IV</b>     | DMSO                          | 10                          |
| 5     | <b>VII</b>    | DMSO                          | 90                          |
| 6     | <b>VIII</b>   | DMSO                          | 0                           |
| 7     | <b>I</b>      | DMF                           | 60                          |
| 8     | <b>I</b>      | DMA                           | 42                          |
| 9     | <b>I</b>      | CH <sub>3</sub> CN            | 41                          |
| 10    | <b>I</b>      | DMSO/CH <sub>3</sub> CN (9/1) | 75                          |

|                 |          |                   |                       |
|-----------------|----------|-------------------|-----------------------|
| 11              | <b>I</b> | THF               | 14                    |
| 12              | <b>I</b> | 1,4-dioxane       | trace                 |
| 13              | <b>I</b> | DCM               | trace                 |
| 14              | <b>I</b> | PhCF <sub>3</sub> | 31                    |
| 15 <sup>d</sup> | --       | DMSO              | 0                     |
| 16 <sup>e</sup> | <b>I</b> | DMSO              | 0                     |
| 17 <sup>f</sup> | <b>I</b> | DMSO              | >95 (90) <sup>c</sup> |

<sup>a</sup>Reaction conditions: A solution of **1a** (0.2 mmol), **2** (0.4 mmol) and photocatalyst (3.0 mol%) in the indicated solvent (c = 0.1 M) was irradiated by two 3 W blue LEDs at room temperature under argon for 12 h. <sup>b</sup>Yield determined by <sup>1</sup>H NMR using dibromomethane as an internal standard. <sup>c</sup>Isolated yield is reported in the parenthesis. <sup>d</sup>In the absence of photocatalyst. <sup>e</sup>Under dark. <sup>f</sup>Irradiated for 24 h.

**Table S2. Optimization of the Reaction Conditions for 2-Substituted Indoles<sup>a</sup>**

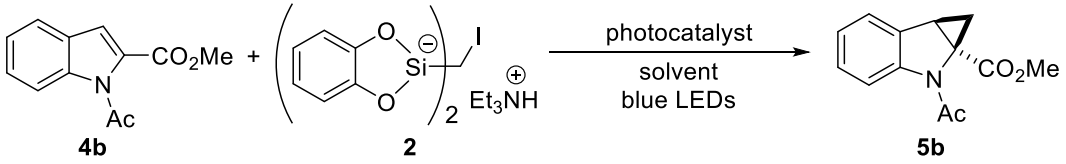

| entry | photocatalyst | solvent                       | yield (%) ( <b>5b</b> ) <sup>b</sup> |
|-------|---------------|-------------------------------|--------------------------------------|
| 1     | <b>I</b>      | DMSO                          | 58                                   |
| 2     | <b>III</b>    | DMSO                          | 38                                   |
| 3     | <b>IV</b>     | DMSO                          | 9                                    |
| 4     | <b>V</b>      | DMSO                          | 20                                   |
| 5     | <b>VII</b>    | DMSO                          | 56                                   |
| 6     | <b>VII</b>    | DMF                           | 53                                   |
| 7     | <b>VII</b>    | DMSO/CH <sub>3</sub> CN (9/1) | 62                                   |
| 8     | <b>VII</b>    | DMSO/CH <sub>3</sub> CN (6/1) | 62                                   |
| 9     | <b>VII</b>    | DMSO/CH <sub>3</sub> CN (3/1) | 60                                   |
| 10    | <b>VII</b>    | DMSO/CH <sub>3</sub> CN (1/1) | 59                                   |

|                 |     |                               |                     |
|-----------------|-----|-------------------------------|---------------------|
| 11              | VII | DMSO/CH <sub>3</sub> CN (1/6) | 36                  |
| 12              | I   | DMSO/CH <sub>3</sub> CN (9/1) | 67(60) <sup>c</sup> |
| 13 <sup>d</sup> | I   | DMSO/CH <sub>3</sub> CN (9/1) | 66                  |
| 14 <sup>e</sup> | —   | DMSO/CH <sub>3</sub> CN (9/1) | 0                   |
| 15 <sup>f</sup> | I   | DMSO/CH <sub>3</sub> CN (9/1) | 0                   |

<sup>a</sup>Reaction conditions: A solution of **4b** (0.2 mmol), **2** (0.4 mmol) and photocatalyst (3.0 mol%) in the indicated solvent (c = 0.1 M) was irradiated by two 3 W blue LEDs at room temperature under argon for 12 h. <sup>b</sup>Determined by <sup>1</sup>H NMR using dibromomethane as an internal standard. <sup>c</sup>Isolated yield is reported in the parenthesis. <sup>d</sup>Irradiated for 24 h. <sup>e</sup>Without a photocatalyst. <sup>f</sup>Under dark.

#### 4. General Procedure for Visible-Light Induced Dearomatization of Indole Derivatives

##### Derivatives

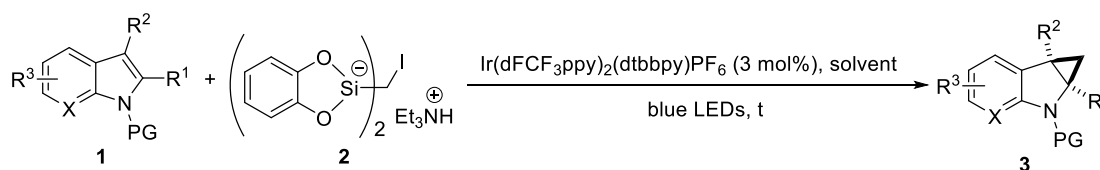

To a flame-dried sealed tube were added indole derivative **1** or **4** (0.2 mmol, 1.0 equiv), **2** (0.4 mmol, 2.0 equiv), Ir(dFCF<sub>3</sub>ppy)<sub>2</sub>(dtbbpy)PF<sub>6</sub> (6.7 mg, 0.006 mmol, 3 mol%) and solvent (DMSO or DMSO/CH<sub>3</sub>CN = 9/1, 2 mL). The reaction mixture was degassed via freeze-pump-thaw for 3 cycles. After thoroughly degassed, the tube was sealed and positioned approximately 3 cm from two 3 W blue LEDs. After the reaction was complete (monitored by TLC), the reaction mixture was transferred to a separatory funnel and diluted with EtOAc (~10 mL) and 2 M aq NaOH (~5 mL). The layers were separated, and the organic layer was washed with additional 2 M aq NaOH (5 mL×2). The organic layer was then washed with deionized H<sub>2</sub>O (~5 mL) and followed by brine (~5 mL). The organic layer was dried over Na<sub>2</sub>SO<sub>4</sub>. After removal of Na<sub>2</sub>SO<sub>4</sub> by filtration, the organic phase was concentrated *in vacuo* by rotary evaporation. Further

purification was accomplished by column chromatography on silica gel (PE/DCM = 1/1 to pure DCM). The analytical data of the products are summarized below.

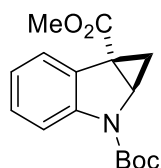

**3a**, 24 h, white solid, 52.1 mg, 90% yield, m.p. = 91.1-92.4 °C. **<sup>1</sup>H NMR** (400 MHz, CDCl<sub>3</sub>) δ 7.85 (brs, 1H), 7.70 (d, *J* = 7.6 Hz, 1H), 7.23-7.19 (m, 1H), 7.05-7.01 (m, 1H), 4.54 (brs, 1H), 3.79 (s, 3H), 1.98-1.95 (m, 1H), 1.59 (s, 9H), 0.74-0.72 (m, 1H). **<sup>13</sup>C NMR** (100 MHz, CDCl<sub>3</sub>) δ 170.8, 151.7, 141.5, 128.9, 127.7, 126.0, 122.4, 115.8, 87.2, 52.5, 46.6, 31.0, 28.5, 19.5. **IR** (thin film):  $\nu_{\max}/\text{cm}^{-1}$  = 1709, 1485, 1383, 1293, 1253, 1152, 1092, 1010, 964, 885, 853, 752, 652, 580, 483. **HRMS (EI)** calcd for C<sub>16</sub>H<sub>19</sub>NO<sub>4</sub> [M]<sup>+</sup>: 289.1309, found: 289.1305.

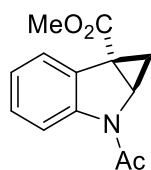

**3b**, 24 h, yellow foam, 29.2 mg, 63% yield. **<sup>1</sup>H NMR** (400 MHz, CDCl<sub>3</sub>) δ 8.17 (d, *J* = 8.0 Hz, 1H), 7.71 (d, *J* = 7.6 Hz, 1H), 7.26-7.24 (m, 1H), 7.12-7.08 (m, 1H), 4.36 (dd, *J* = 6.4, 4.0 Hz, 1H), 3.82 (s, 3H), 2.40 (s, 3H), 2.03-2.00 (m, 1H), 0.92-0.89 (m, 1H). **<sup>13</sup>C NMR** (100 MHz, CDCl<sub>3</sub>) δ 170.5, 168.6, 141.9, 128.9, 128.2, 125.9, 123.7, 117.6, 52.7, 47.1, 32.3, 24.5, 20.7. **IR** (thin film):  $\nu_{\max}/\text{cm}^{-1}$  = 2922, 1729, 1673, 1438, 1390, 1304, 1243, 1197, 1114, 1076, 988, 776, 619, 549, 478. **HRMS (EI)** calcd for C<sub>13</sub>H<sub>13</sub>NO<sub>3</sub> [M]<sup>+</sup>: 231.0890, found: 231.0888.

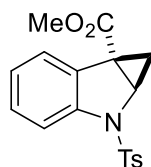

**3c**, 24 h, yellow oil, 42.6 mg, 62% yield. **<sup>1</sup>H NMR** (400 MHz, CDCl<sub>3</sub>) δ 7.65 (d, *J* = 8.4 Hz, 1H), 7.62-7.58 (m, 3H), 7.25-7.21 (m, 1H), 7.19 (d, *J* = 8.0 Hz, 2H), 7.08-7.04 (m, 1H), 4.50 (dd, *J* = 6.8, 4.0 Hz, 1H), 3.70 (s, 3H), 2.35 (s, 3H), 1.81 (dd, *J* = 6.8, 5.6 Hz, 1H), 0.32 (dd, *J* = 5.6, 4.0 Hz, 1H). **<sup>13</sup>C NMR** (100 MHz, CDCl<sub>3</sub>) δ 170.0, 144.6,



140.6, 133.7, 130.6, 129.7, 128.0, 127.5, 126.1, 124.1, 116.3, 52.5, 47.8, 31.2, 21.7, 18.5. **IR** (thin film):  $\nu_{\text{max}}/\text{cm}^{-1} = 1725, 1438, 1358, 1292, 1164, 1088, 957, 813, 754, 718, 661, 573, 543$ . **HRMS (ESI)** calcd for  $\text{C}_{18}\text{H}_{17}\text{NO}_4\text{NaS}$   $[\text{M}+\text{Na}]^+$ : 366.0771, found: 366.0769.

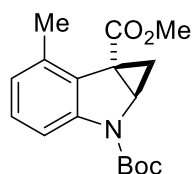

**3d**, 24 h, yellow oil, 38.3 mg, 63% yield.  **$^1\text{H NMR}$**  (400 MHz,  $\text{CDCl}_3$ )  $\delta$  7.69 (brs, 1H), 7.15-7.11 (m, 1H), 6.84 (d,  $J = 7.6$  Hz, 1H), 7.19 (d,  $J = 8.0$  Hz, 1H), 4.35 (brs, 1H), 3.77 (s, 3H), 2.35 (s, 3H), 2.07-2.05 (m, 1H), 1.59 (s, 9H), 0.74-0.71 (m, 1H).  **$^{13}\text{C NMR}$**  (100 MHz,  $\text{CDCl}_3$ )  $\delta$  170.2, 151.7, 142.0, 135.1, 128.4, 128.2, 124.6, 113.5, 81.5, 52.5, 46.9, 30.4, 28.5, 19.8, 16.7. **IR** (thin film):  $\nu_{\text{max}}/\text{cm}^{-1} = 1706, 1459, 1371, 1249, 1155, 1108, 891, 777, 732, 672$ . **HRMS (EI)** calcd for  $\text{C}_{17}\text{H}_{21}\text{NO}_4$   $[\text{M}]^+$ : 303.1465, found: 303.1471.

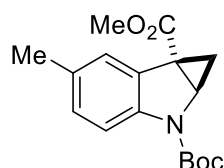

**3e**, 24 h, yellow oil, 51.2 mg, 84% yield.  **$^1\text{H NMR}$**  (400 MHz,  $\text{CDCl}_3$ )  $\delta$  7.71 (brs, 1H), 7.51 (s, 1H), 7.03-7.00 (m, 1H), 4.51 (brs, 1H), 3.79 (s, 3H), 2.35 (s, 3H), 1.96-1.93 (m, 1H), 1.58 (s, 9H), 0.73-0.71 (m, 1H).  **$^{13}\text{C NMR}$**  (100 MHz,  $\text{CDCl}_3$ )  $\delta$  170.8, 151.8, 139.3, 132.0, 128.8, 128.3, 126.4, 115.5, 81.6, 52.4, 46.7, 30.9, 28.5, 21.1, 19.8. **IR** (thin film):  $\nu_{\text{max}}/\text{cm}^{-1} = 1706, 1484, 1365, 1304, 1255, 1149, 1085, 896, 816, 758, 733, 641, 474$ . **HRMS (EI)** calcd for  $\text{C}_{17}\text{H}_{21}\text{NO}_4$   $[\text{M}]^+$ : 303.1465, found: 303.1463.

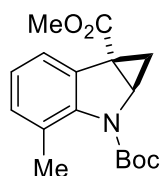

**3f**, 24 h, white solid, 52.6 mg, 87% yield, m.p. = 112.4-112.7 °C.  **$^1\text{H NMR}$**  (400 MHz,  $\text{CDCl}_3$ )  $\delta$  7.58-7.56 (m, 1H), 7.08-7.03 (m, 2H), 4.66 (dd,  $J = 7.2, 4.0$  Hz, 1H), 3.81 (s,

3H), 2.28 (s, 3H), 2.01 (dd,  $J = 7.2, 5.6$  Hz, 1H), 1.56 (s, 9H), 0.47-0.45 (m, 1H).  $^{13}\text{C}$  NMR (100 MHz,  $\text{CDCl}_3$ )  $\delta$  170.7, 153.0, 138.8, 131.6, 130.3, 128.9, 124.1, 122.9, 82.2, 52.4, 47.0, 30.7, 28.4, 20.6, 20.5. **IR** (thin film):  $\nu_{\text{max}}$  ( $\text{cm}^{-1}$ ) = 2976, 1718, 1457, 1362, 1293, 1247, 1152, 1118, 1071, 924, 844, 767, 553, 463. **HRMS (EI)** calcd for  $\text{C}_{17}\text{H}_{21}\text{NO}_4$ .  $[\text{M}]^+$ : 303.1465, found: 303.1460.

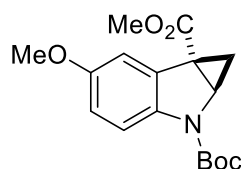

**3g**, 24 h, white foam, 57.9 mg, 91% yield.  $^1\text{H}$  NMR (400 MHz,  $\text{CDCl}_3$ )  $\delta$  7.74 (brs, 1H), 7.29-7.28 (m, 1H), 6.76-6.73 (m, 1H), 4.67-4.51 (m, 1H), 3.80 (s, 3H), 3.78 (s, 3H), 1.95-1.93 (m, 1H), 1.57 (s, 9H), 0.76-0.73 (m, 1H).  $^{13}\text{C}$  NMR (100 MHz,  $\text{CDCl}_3$ )  $\delta$  170.6, 155.4, 151.8, 135.2, 130.1, 116.3, 112.9, 112.1, 81.5, 55.8, 52.4, 46.8, 30.3, 28.5, 20.0. **IR** (thin film):  $\nu_{\text{max}}/\text{cm}^{-1} = 1702, 1481, 1429, 1380, 1331, 1299, 1255, 1154, 1077, 1048, 888, 805, 756, 733, 647, 462$ . **HRMS (ESI)** calcd for  $\text{C}_{17}\text{H}_{21}\text{NO}_5\text{Na}$   $[\text{M}+\text{Na}]^+$ : 342.1312, found: 342.1311.

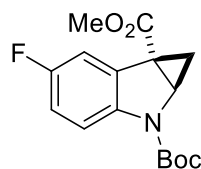

**3h**, 24 h, yellow oil, 45.7 mg, 74% yield.  $^1\text{H}$  NMR (400 MHz,  $\text{CDCl}_3$ )  $\delta$  7.78 (s, 1H), 7.43-7.41 (m, 1H), 6.93-6.87 (m, 1H), 4.67-4.55 (m, 1H), 3.80 (s, 3H), 1.98-1.95 (m, 1H), 1.58 (s, 9H), 0.76-0.74 (m, 1H).  $^{13}\text{C}$  NMR (100 MHz,  $d_6$ -DMSO, 110  $^\circ\text{C}$ )  $\delta$  168.4, 156.6, 150.5, 147.3 (d,  $J = 202.0$  Hz), 130.4 (d,  $J = 6.0$  Hz), 115.5 (d,  $J = 6.0$  Hz), 113.2 (d,  $J = 16.0$  Hz), 112.2 (d,  $J = 16.0$  Hz), 81.3, 51.51, 51.48, 29.8 (d,  $J = 2.0$  Hz), 27.4, 18.1.  $^{19}\text{F}$  NMR (376 MHz,  $\text{CDCl}_3$ )  $\delta$  -120.99 (s). **IR** (thin film):  $\nu_{\text{max}}/\text{cm}^{-1} = 1707, 1480, 1381, 1302, 1230, 1149, 1080, 943, 814, 733, 639, 472$ . **HRMS (EI)** calcd for  $\text{C}_{16}\text{H}_{18}\text{FNO}_4$   $[\text{M}]^+$ : 307.1214, found: 307.1211.

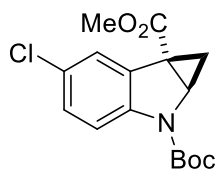

**3i**, 24 h, white foam, 46.4 mg, 72% yield.  $^1\text{H NMR}$  (400 MHz,  $\text{CDCl}_3$ )  $\delta$  7.77 (brs, 1H), 7.673-7.668 (m, 1H), 7.17 (dd,  $J = 8.8, 2.4$  Hz, 1H), 4.55 (brs, 1H), 3.80 (s, 3H), 1.99-1.96 (m, 1H), 1.58 (s, 9H), 0.75-0.72 (m, 1H).  $^{13}\text{C NMR}$  (100 MHz,  $d_6$ -DMSO, 110  $^\circ\text{C}$ )  $\delta$  168.3, 150.4, 139.2, 130.6, 126.6, 125.6, 124.9, 115.8, 81.5, 51.5, 45.6, 29.7, 27.4, 17.9. **IR** (thin film):  $\nu_{\text{max}}/\text{cm}^{-1} = 1706, 1474, 1380, 1298, 1253, 1155, 1072, 827, 749, 701, 618, 476$ . **HRMS (EI)** calcd for  $\text{C}_{16}\text{H}_{18}\text{ClNO}_4$   $[\text{M}]^+$ : 323.0919, found: 323.0910

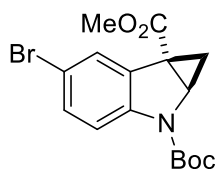

**3j**, 24 h, yellow oil, 68.7 mg, 93% yield.  $^1\text{H NMR}$  (400 MHz,  $\text{CDCl}_3$ )  $\delta$  7.82-7.81 (m, 1H), 7.71 (brs, 1H), 7.31 (dd,  $J = 3.2, 2.4$  Hz, 1H), 4.55 (brs, 1H), 3.80 (s, 3H), 1.98-1.95 (m, 1H), 1.58 (s, 9H), 0.74-0.71 (m, 1H).  $^{13}\text{C NMR}$  (100 MHz,  $d_6$ -DMSO, 110  $^\circ\text{C}$ )  $\delta$  168.3, 150.4, 139.7, 131.0, 129.6, 127.8, 116.3, 113.2, 81.6, 51.5, 45.6, 29.6, 27.4, 17.9. **IR** (thin film):  $\nu_{\text{max}}/\text{cm}^{-1} = 1710, 1486, 1437, 1382, 1331, 1294, 1253, 1152, 1118, 1094, 1056, 1010, 963, 886, 856, 748, 653, 583, 532, 484$ . **HRMS (DART)** calcd for  $\text{C}_{16}\text{H}_{19}^{79}\text{BrNO}_4$   $[\text{M}+\text{H}]^+$ : 368.0492, found: 368.0492.

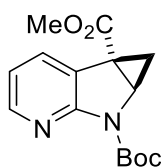

**3k**, 24 h, yellow oil, 33.4 mg, 58% yield.  $^1\text{H NMR}$  (400 MHz,  $\text{CDCl}_3$ )  $\delta$  8.29 (dd,  $J = 5.2, 2.0$  Hz, 1H), 7.98 (dd,  $J = 7.6, 1.6$  Hz, 1H), 6.95 (dd,  $J = 7.6, 5.2$  Hz, 1H), 4.54 (dd,  $J = 6.4, 4.0$  Hz, 1H), 3.81 (s, 3H), 2.00 (dd,  $J = 6.8, 5.6$  Hz, 1H), 1.60 (s, 9H), 0.77 (dd,  $J = 5.6, 4.0$  Hz, 1H).  $^{13}\text{C NMR}$  (100 MHz,  $\text{CDCl}_3$ )  $\delta$  170.3, 154.6, 150.2, 147.4, 134.3, 123.0, 117.8, 82.6, 52.7, 44.9, 28.4, 28.4, 19.1. **IR** (thin film):  $\nu_{\text{max}}/\text{cm}^{-1} = 1727, 1419, 1368, 1340, 1305, 1274, 1152, 1086, 844, 774$ . **HRMS (ESI)** calcd for  $\text{C}_{15}\text{H}_{18}\text{N}_2\text{O}_4\text{Na}$   $[\text{M}+\text{Na}]^+$ : 313.1159, found: 313.1156.

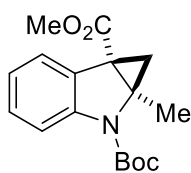

**3l**, 24 h, colorless oil, 30.4 mg, 50% yield.  $^1\text{H NMR}$  (400 MHz,  $\text{CDCl}_3$ )  $\delta$  7.72 (d,  $J = 8.0$  Hz, 1H), 7.47 (d,  $J = 7.6$  Hz, 1H), 7.20-7.17 (m, 1H), 7.02-6.98 (m, 1H), 3.81 (s, 3H), 2.02 (d,  $J = 5.2$  Hz, 1H), 1.78 (s, 3H), 1.59 (s, 9H), 0.99 (d,  $J = 5.6$  Hz, 1H).  $^{13}\text{C NMR}$  (100 MHz,  $\text{CDCl}_3$ )  $\delta$  169.8, 152.5, 143.3, 129.4, 127.6, 125.8, 122.3, 115.8, 82.1, 54.3, 52.5, 38.1, 28.5, 24.6, 16.6. **IR** (thin film):  $\nu_{\text{max}}/\text{cm}^{-1} = 1709, 1476, 1379, 1315, 1106, 843, 749, 461$ . **HRMS (EI)** calcd for  $\text{C}_{17}\text{H}_{21}\text{NO}_4$   $[\text{M}]^+$ : 303.1465, found: 303.1463.

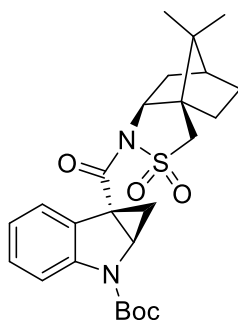

**3m**, 24 h, white solid, 65.0 mg, 69% yield, m.p. = 140.7-141.8 °C.  $^1\text{H NMR}$  (400 MHz,  $\text{CDCl}_3$ )  $\delta$  7.85 (brs, 1H), 7.55 (d,  $J = 7.6$  Hz, 1H), 7.21-7.17 (m, 1H), 6.97-6.93 (m, 1H), 4.70 (brs, 1H), 3.90 (t,  $J = 6.4$  Hz, 1H), 3.52-3.41 (m, 2H), 2.11-2.06 (m, 2H), 1.91-1.88 (m, 3H), 1.82-1.79 (m, 1H), 1.58 (s, 9H), 1.49-1.45 (m, 1H), 1.38-1.34 (m, 1H), 1.29 (s, 3H), 0.98 (s, 3H), 0.83 (dd,  $J = 6.4, 4.0$  Hz, 1H).  $^{13}\text{C NMR}$  (100 MHz,  $\text{CDCl}_3$ )  $\delta$  166.8, 152.2, 141.0, 130.3, 127.9, 124.6, 122.1, 115.9, 84.2, 65.6, 52.9, 48.5, 48.1, 44.3, 43.4, 38.1, 35.0, 32.9, 28.5, 26.6, 20.9, 20.0, 18.0. **IR** (thin film):  $\nu_{\text{max}}/\text{cm}^{-1} = 2955, 2644, 2317, 1739, 1665, 1469, 1374, 1330, 1240, 1193, 1109, 1009, 890, 813$ . **HRMS (ESI)** calcd for  $\text{C}_{25}\text{H}_{32}\text{N}_2\text{O}_5\text{NaS}$   $[\text{M}+\text{Na}]^+$ : 495.1924, found: 495.1922.

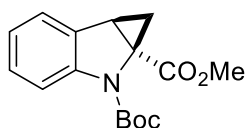

**5a**, 12 h, yellow oil, 17.3 mg, 30% yield.  $^1\text{H NMR}$  (400 MHz,  $\text{CDCl}_3$ )  $\delta$  7.74 (brs, 1H), 7.23-7.21 (m, 1H), 7.19-7.15 (m, 1H), 6.96-6.91 (m, 1H), 3.76 (s, 3H), 2.93 (dd,  $J =$

7.2, 5.6 Hz, 1H), 2.11 (dd,  $J = 7.2, 5.6$  Hz, 1H), 1.54 (s, 9H), 0.84-0.81 (m, 1H),  $^{13}\text{C}$  NMR (100 MHz,  $\text{CDCl}_3$ )  $\delta$  169.3, 152.1, 143.0, 130.4, 127.6, 124.0, 122.5, 115.7, 81.8, 52.3, 48.6, 31.6, 28.1, 17.7. IR (thin film):  $\nu_{\text{max}}/\text{cm}^{-1} = 2978, 1710, 1477, 1440, 1349, 1255, 1236, 1197, 1158, 1112, 1079, 998, 966, 915, 841, 748, 730.7, 625, 459$ . HRMS (DART) calcd for  $\text{C}_{16}\text{H}_{20}\text{O}_4\text{N}$   $[\text{M}+\text{H}]^+$ : 290.1387, found: 290.1387.

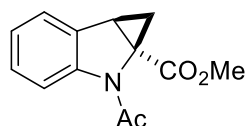

**5b**, 12 h, colorless oil, 27.8 mg, 60% yield,  $^1\text{H}$  NMR (600 MHz,  $\text{DMSO}-d_6$ )  $\delta$  7.86 (brs, 1H), 7.38-7.37 (m, 1H), 7.22-7.20 (m, 1H), 7.05-7.02 (m, 1H), 3.76 (s, 3H), 3.27 (dd,  $J = 9.6, 6.0$  Hz, 1H), 2.22 (s, 3H), 2.17 (dd,  $J = 9.6, 5.4$  Hz, 1H), 1.26-1.24 (m, 1H).  $^{13}\text{C}$  NMR (100 MHz,  $\text{CDCl}_3$ )  $\delta$  169.6, 168.7, 143.5, 130.0, 127.2, 124.0, 122.9, 116.1, 52.3, 49.1, 33.0, 23.5, 19.3. IR (thin film):  $\nu_{\text{max}}/\text{cm}^{-1} = 3099, 3010, 2958, 2921, 2849, 1730, 1677, 1600, 1464, 1434, 1380, 1324, 1305, 1249, 1195, 1160, 1078, 1041, 1026, 1012, 996, 967, 932, 907, 874.5, 860, 845, 781, 754, 740, 666, 621, 604, 573, 484$ . HRMS (EI) calcd for  $\text{C}_{13}\text{H}_{13}\text{NO}_3$   $[\text{M}]^+$ : 231.0890, found: 231.0885.

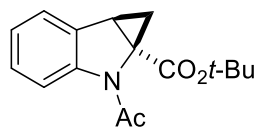

**5c**, 12 h, white solid, 33.1 mg, 61% yield, m.p. = 131.7-132.6 °C.  $^1\text{H}$  NMR (400 MHz,  $\text{CDCl}_3$ )  $\delta$  8.10 (brs, 1H), 7.28 (d,  $J = 7.6$  Hz, 1H), 7.23-7.19 (m, 1H), 7.04-7.00 (m, 1H), 3.06-3.02 (m, 1H), 2.32 (s, 3H), 2.21 (dd,  $J = 9.2, 5.2$  Hz, 1H), 1.49 (s, 9H), 1.04 (s, 1H).  $^{13}\text{C}$  NMR (100 MHz,  $\text{CDCl}_3$ )  $\delta$  170.8, 168.2, 144.4, 130.2, 127.9, 123.9, 123.6, 117.9, 82.9, 50.4, 34.4, 28.1, 24.3, 20.3. IR (thin film):  $\nu_{\text{max}}/\text{cm}^{-1} = 2973, 2931, 1721, 1682, 1603, 1477, 1463, 1430, 1368, 1341, 1319, 1306, 1247, 1197, 1148, 1075, 1036, 1011, 971, 951, 884, 861, 840, 784, 755, 743, 663, 621, 607, 575, 529, 501, 464$ . HRMS (EI) calcd for  $\text{C}_{16}\text{H}_{19}\text{NO}_3$   $[\text{M}]^+$ : 273.1359, found: 273.1351.

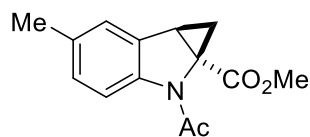

**5d**, 12 h, yellow oil, 24.8 mg, 51% yield.  $^1\text{H NMR}$  (400 MHz,  $\text{CDCl}_3$ )  $\delta$  7.96 (brs, 1H), 7.09 (s, 1H), 7.02 (d,  $J = 8.0$  Hz, 1H), 3.80 (s, 3H), 3.06 (s, 1H), 2.30-2.26 (m, 7H), 1.12 (s, 1H).  $^{13}\text{C NMR}$  (100 MHz,  $\text{CDCl}_3$ )  $\delta$  170.5, 169.8, 142.0, 133.5, 129.8, 128.5, 124.6, 117.7, 52.9, 49.9, 35.0, 24.1, 21.0. **IR** (thin film):  $\nu_{\text{max}}/\text{cm}^{-1} = 3004, 2953, 2921, 2855, 1723, 1676, 1586, 1479, 1444, 1372, 1329, 1300, 1251, 1227, 1198, 1165, 1071, 1034, 1017, 986, 973, 923, 886, 868, 823, 748, 730, 655, 629, 580, 548, 486, 449, 412$ . **HRMS (ESI)** calcd for  $\text{C}_{14}\text{H}_{15}\text{NO}_3\text{Na}$   $[\text{M}+\text{Na}]^+$ : 268.0944, found: 268.0950

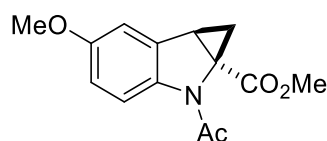

**5e**, 12 h, yellow oil, 27.4 mg, 52% yield.  $^1\text{H NMR}$  (400 MHz,  $\text{CDCl}_3$ )  $\delta$  8.01-7.98 (m, 1H), 6.85-6.84 (m, 1H), 6.73 (dd,  $J = 8.8, 2.8$  Hz, 1H), 3.80 (s, 3H), 3.77 (s, 3H), 3.07-3.04 (m, 1H), 2.30-2.25 (m, 4H), 1.16 (s, 1H).  $^{13}\text{C NMR}$  (100 MHz,  $\text{CDCl}_3$ )  $\delta$  170.4, 169.7, 156.4, 138.0, 131.2, 118.6, 112.4, 110.5, 55.8, 52.9, 50.2, 34.9, 24.0, 21.1. **IR** (thin film):  $\nu_{\text{max}}/\text{cm}^{-1} = 3003, 295, 2836, 1729, 1668, 1614, 1593, 1480, 1437, 1371, 1332, 1299, 1250, 1231, 1197, 1163, 1147, 1068, 1032, 986, 957, 925, 870, 851, 819, 728, 653, 624, 592, 568, 547, 507, 480, 441$ . **HRMS (ESI)** calcd for  $\text{C}_{14}\text{H}_{15}\text{NO}_4\text{Na}$   $[\text{M}+\text{Na}]^+$ : 284.0893, found: 284.0887.

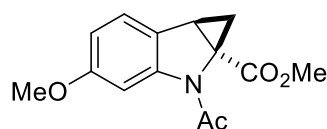

**5f**, 12 h, yellow solid, 30.8 mg, 59% yield, m.p. = 103.2-104.1 °C.  $^1\text{H NMR}$  (400 MHz,  $\text{CDCl}_3$ )  $\delta$  7.77 (brs, 1H), 7.13 (d,  $J = 8.0$  Hz, 1H), 6.57 (dd,  $J = 8.4, 2.4$  Hz, 1H), 3.80 (s, 3H), 3.78 (s, 3H), 3.06-3.03 (m, 1H), 2.28-2.22 (m, 4H), 1.11 (s, 1H).  $^{13}\text{C NMR}$  (100 MHz,  $\text{CDCl}_3$ )  $\delta$  170.9, 169.8, 159.9, 145.7, 124.1, 121.9, 109.8, 104.0, 55.7, 52.9, 50.4, 34.5, 24.2, 21.1. **IR** (thin film):  $\nu_{\text{max}}/\text{cm}^{-1} = 3098, 3008, 2952, 2843, 1733, 1675, 1611, 1592, 1490, 1439, 1371, 1341, 1321, 1293, 1253, 1234, 1194, 1168, 1149, 1122, 1086, 1067, 1051, 1023, 983, 948, 888, 865, 844, 807, 772, 739, 723, 667, 643, 595, 520, 474$ . **HRMS (ESI)** calcd for  $\text{C}_{14}\text{H}_{15}\text{NO}_4\text{Na}$   $[\text{M}+\text{Na}]^+$ : 289.0893, found: 284.0895.

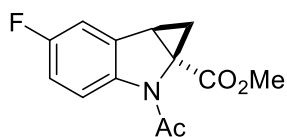

**5g**, 12 h, white solid, 25.9 mg, 52% yield, m.p. = 125.0-127.6 °C. **<sup>1</sup>H NMR** (400 MHz, CDCl<sub>3</sub>) δ 7.77 (brs, 1H), 6.99-6.97 (m, 1H), 6.92-6.87 (m, 1H), 3.81 (s, 3H), 3.07 (dd, *J* = 9.2, 5.6 Hz, 1H), 2.32-2.27 (m, 4H), 1.15 (s, 1H). **<sup>13</sup>C NMR** (100 MHz, CDCl<sub>3</sub>) δ 170.5, 169.4, 159.4 (d, *J* = 241.1 Hz), 140.4, 131.6, 114.3 (d, *J* = 22.7 Hz), 111.5 (d, *J* = 25.0 Hz), 53.0, 50.3, 34.3, 24.0, 20.6. **<sup>19</sup>F NMR** (376 MHz, CDCl<sub>3</sub>) δ -119.27 (s). **IR** (thin film):  $\nu_{\max}/\text{cm}^{-1}$  = 3099, 3015, 2953, 1727, 1680, 1609, 1470, 1441, 1374, 1320, 1295, 1244, 1226, 1199, 1166, 1135, 1107, 1079, 1040, 1019, 961, 933, 882, 856, 826, 740, 655, 629, 590, 546, 515, 487, 444, 427. **HRMS (EI)** calcd for C<sub>13</sub>H<sub>12</sub>FNO<sub>3</sub> [M]<sup>+</sup>: 249.0796, found: 249.0789.

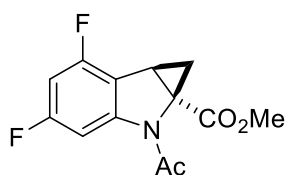

**5h**, 12 h, yellow solid, 32.5 mg, 61% yield, m.p. = 101.2-102.4 °C. **<sup>1</sup>H NMR** (400 MHz, CDCl<sub>3</sub>) δ 7.64 (brs, 1H), 6.53-6.48 (m, 1H), 3.82 (s, 3H), 2.32 (dd, *J* = 9.2, 5.2 Hz, 1H), 2.28 (s, 3H), 1.16-1.13 (m, 1H). **<sup>13</sup>C NMR** (100 MHz, CDCl<sub>3</sub>) δ 170.6, 169.0, 163.1 (dd, *J* = 244.1, 12.0 Hz), 158.2 (dd, *J* = 245.9, 14.7 Hz), 146.8, 112.5, 102.3 (d, *J* = 30.0 Hz), 99.0 (dd, *J* = 27.1, 23.9 Hz), 53.1, 50.4, 30.5, 24.2, 19.8. **<sup>19</sup>F NMR** (376 MHz, CDCl<sub>3</sub>) δ -108.7--108.9 (m), -117.7 (s). **IR** (thin film):  $\nu_{\max}/\text{cm}^{-1}$  = 3106, 3013, 2956, 2922, 2852, 1738, 1689, 1631, 1603, 1488, 1439, 1366, 1306, 1256, 1204, 1183, 1164, 1112, 1086, 1043, 993, 975, 919, 893, 874, 857, 817, 802, 770, 742, 701, 622, 601, 573, 536, 501, 481, 412. **HRMS (EI)** calcd for C<sub>13</sub>H<sub>11</sub>F<sub>2</sub>NO<sub>3</sub> [M]<sup>+</sup>: 267.0702, found: 267.0702.

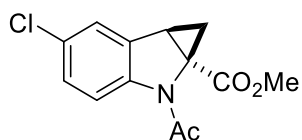

**5i**, 12 h, yellow solid, 27.2 mg, 51% yield, m.p. = 101.6-102.8 °C. **<sup>1</sup>H NMR** (400 MHz, CDCl<sub>3</sub>) δ 8.01 (brs, 1H), 7.24 (d, *J* = 2.4 Hz, 1H), 7.17 (dd, *J* = 8.4, 2.0 Hz, 1H), 3.81 (s, 3H), 3.07 (dd, *J* = 9.2, 5.2 Hz, 1H), 2.32-2.28 (m, 4H), 1.13 (s, 1H). **<sup>13</sup>C NMR** (100

MHz, CDCl<sub>3</sub>)  $\delta$  170.6, 169.3, 142.9, 131.6, 128.8, 128.0, 124.3, 118.8, 53.1, 50.1, 34.3, 24.1, 20.4. **IR** (thin film):  $\nu_{\max}/\text{cm}^{-1}$  = 2955, 2644, 2317, 1739, 1665, 1469, 1374, 1330, 1240, 1193, 1109, 1009, 890, 813. **HRMS (EI)** calcd for C<sub>13</sub>H<sub>12</sub>ClNO<sub>3</sub> [M]<sup>+</sup>: 265.0500, found: 265.0492.

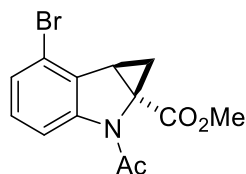

**5j**, 12 h, yellow solid, 38.6 mg, 60% yield, m.p. = 71.9-72.8 °C. **<sup>1</sup>H NMR** (400 MHz, CDCl<sub>3</sub>)  $\delta$  8.00 (brs, 1H), 7.18-7.16 (m, 1H), 7.10-7.05 (m, 1H), 3.81 (s, 3H), 3.19 (dd,  $J$  = 9.6, 5.6 Hz, 1H), 2.34 (dd,  $J$  = 9.2, 5.2 Hz, 1H), 2.28 (s, 3H), 1.15 (s, 1H). **<sup>13</sup>C NMR** (100 MHz, CDCl<sub>3</sub>)  $\delta$  170.8, 169.1, 144.9, 130.6, 129.7, 126.7, 118.2, 116.6, 53.1, 49.3, 35.5, 24.2, 19.8. **IR** (thin film):  $\nu_{\max}/\text{cm}^{-1}$  = 3004, 2956, 1721, 1677, 1593, 1575, 1467, 1438, 1368, 1320, 1294, 1252, 1201, 1166, 1141, 1075, 1056, 1039, 1020, 985, 967, 944, 904, 875, 853, 777, 746, 696, 640, 607, 573, 537, 513, 485, 446, 412. **HRMS (EI)** calcd for C<sub>13</sub>H<sub>12</sub><sup>79</sup>BrNO<sub>3</sub> [M]<sup>+</sup>: 308.9995, found: 308.9991.

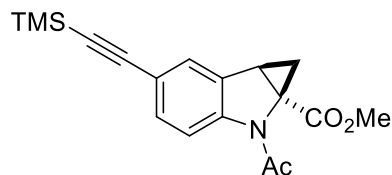

**5k**, 12 h, yellow solid, 33.9 mg, 52% yield, m.p. = 127.9-129.0 °C. **<sup>1</sup>H NMR** (400 MHz, CDCl<sub>3</sub>)  $\delta$  7.99 (brs, 1H), 7.38-7.37 (m, 1H), 7.33 (dd,  $J$  = 8.4, 2.0 Hz, 1H), 3.81 (s, 3H), 3.08-3.04 (m, 1H), 2.30-2.27 (m, 4H), 1.09 (s, 1H), 0.23 (s, 9H). **<sup>13</sup>C NMR** (100 MHz, CDCl<sub>3</sub>)  $\delta$  170.6, 169.4, 144.2, 132.4, 130.0, 127.6, 118.5, 117.5, 104.9, 93.8, 53.0, 49.9, 34.4, 24.3, 20.4, 0.1. **IR** (thin film):  $\nu_{\max}/\text{cm}^{-1}$  = 2959, 2153, 1737, 1679, 1604, 1477, 1439, 1370, 1327, 1303, 1249, 1228, 1196, 1166, 1083, 1063, 1048, 1017, 990, 961, 930, 907, 884, 841, 826, 760, 743, 699, 667, 648, 624, 592, 577, 528, 506, 457. **HRMS (ESI)** calcd for C<sub>18</sub>H<sub>21</sub>NO<sub>3</sub>NaSi [M+Na]<sup>+</sup>: 350.1183, found: 350.1178.

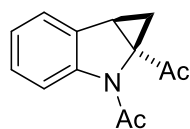



**5l**, 12 h, yellow oil, 34.3 mg, 80% yield.  $^1\text{H NMR}$  (400 MHz,  $\text{CDCl}_3$ )  $\delta$  8.09 (brs, 1H), 7.29-7.21 (m, 2H), 7.06-7.02 (m, 1H), 2.98 (s, 1H), 2.41 (dd,  $J = 9.2, 5.2$  Hz, 1H), 2.27-2.24 (m, 6H), 1.14 (s, 1H).  $^{13}\text{C NMR}$  (100 MHz,  $\text{CDCl}_3$ )  $\delta$  201.7, 170.4, 144.2, 130.1, 128.1, 123.9, 118.1, 58.2, 36.5, 26.1, 24.5, 20.4. **IR** (thin film):  $\nu_{\text{max}}/\text{cm}^{-1} = 3104, 3015, 2920, 2851, 1687, 1669, 1599, 1476, 1463, 1436, 1373, 1339, 1321, 1310, 125, 1215, 1184, 1143, 1110, 1073, 1027, 990, 962, 931, 919, 821, 761, 681, 646, 608, 583, 556, 515, 487, 448$ . **HRMS (EI)** calcd for  $\text{C}_{13}\text{H}_{13}\text{NO}_2$   $[\text{M}]^+$ : 215.0941, found: 215.0935.

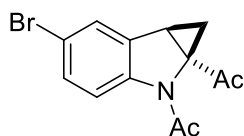

**5m**, 12 h, yellow oil, 42.9 mg, 73% yield.  $^1\text{H NMR}$  (400 MHz,  $\text{CDCl}_3$ )  $\delta$  7.80 (brs, 1H), 7.389-7.386 (m, 1H), 7.33 (dd,  $J = 6.0, 1.2$  Hz, 1H), 2.91 (dd,  $J = 6.4, 3.6$  Hz, 1H), 2.40 (dd,  $J = 6.4, 3.6$  Hz, 1H), 2.27-2.25 (m, 6H), 1.08-1.06 (m, 1H).  $^{13}\text{C NMR}$  (100 MHz,  $\text{CDCl}_3$ )  $\delta$  200.6, 170.1, 143.2, 132.9, 131.0, 127.4, 118.9, 116.6, 58.4, 34.8, 25.8, 24.3, 19.7. **IR** (thin film):  $\nu_{\text{max}}/\text{cm}^{-1} = 1690, 1663, 1595, 1467, 1418, 1371, 1334, 1296, 1244, 1196, 1179, 1141, 1058, 1030, 983, 964, 932, 878, 828, 738, 698, 659, 614, 568, 514, 492, 456$ . **HRMS (EI)** calcd for  $\text{C}_{13}\text{H}_{12}^{79}\text{BrNO}_3$   $[\text{M}]^+$ : 293.0046, found: 293.0042.

## 5. Scale-up Experiment and Transformations of 3b, 4b and 3m

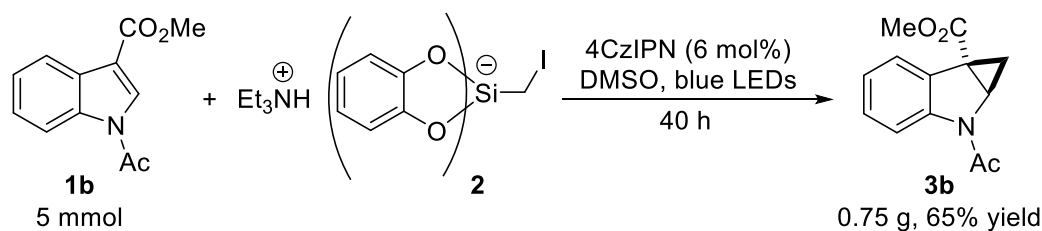

To a flame-dried sealed tube were added indole derivative **1b** (1.09 g, 5 mmol, 1.0 equiv), **2** (4.87 g, 10 mmol, 2.0 equiv), 4CzIPN (236.7 mg, 0.3 mmol, 6 mol%) and DMSO (50 mL). The reaction mixture was degassed via freeze-pump-thaw for 3 cycles. After thoroughly degassed, the tube was sealed and positioned approximately 3 cm from two 3 W blue LEDs. After the reaction was complete (monitored by TLC), the reaction mixture was transferred to a separatory funnel and diluted with EtOAc (~300 mL) and 2 M aq NaOH (~100 mL). The layers were separated, and the organic layer

was washed with additional 2 M aq NaOH (100 mL×2). The organic layer was then washed with deionized H<sub>2</sub>O (~100 mL), and followed by brine (~100 mL). The organic layer was dried over Na<sub>2</sub>SO<sub>4</sub>. After removal of Na<sub>2</sub>SO<sub>4</sub> by filtration, the organic phase was concentrated *in vacuo* by rotary evaporation. Further purification was accomplished by column chromatography on silica gel (PE/DCM = 1/1 to pure DCM) to afford **3b** in 65% yield (0.75g).

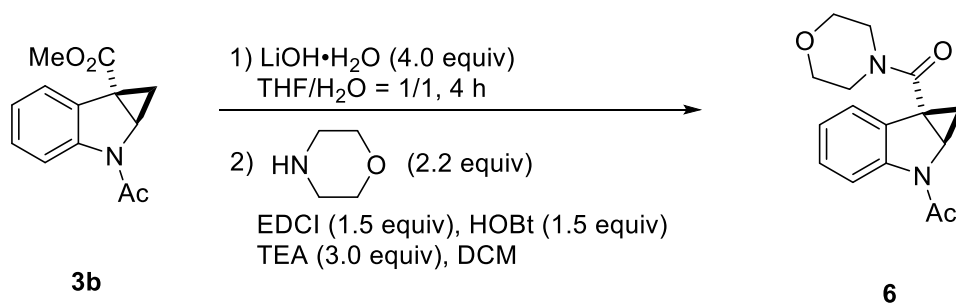

A solution of compound **3b** (85.6 mg, 0.37 mmol, 1.0 equiv) in THF (2 mL) was slowly added to a solution of LiOH·H<sub>2</sub>O (62.2 mg, 1.48 mmol, 4.0 equiv) in water (2 mL). The resulting mixture was vigorously stirred at room temperature for 4 h. THF was then evaporated under reduced pressure. The resulting aqueous solution was acidified with 2M HCl to pH = 2, and then extracted with DCM (25 mL×3). The combined organic layers were dried over anhydrous Na<sub>2</sub>SO<sub>4</sub>. After removal of Na<sub>2</sub>SO<sub>4</sub> by filtration, the solvent was concentrated *in vacuo* by rotary evaporation. The product was used directly without further purification.

To a solution of the above obtained carboxylic acid (0.37 mmol) in DCM (4 mL) were added HOBt (75.0 mg, 0.56 mmol, 1.5 equiv), EDCI (106.4 mg, 0.56 mmol, 1.5 equiv) at room temperature under argon. After stirring for 5 minutes, morpholine (71 μL, 0.82 mmol, 2.2 equiv) and triethylamine (128 μL, 0.93 mmol, 2.5 equiv) were added slowly. The reaction mixture was stirred at room temperature overnight. The mixture was quenched with H<sub>2</sub>O (10 mL) and extracted with DCM (25 mL×3). The combined organic layers were dried over anhydrous Na<sub>2</sub>SO<sub>4</sub>. After removal of Na<sub>2</sub>SO<sub>4</sub> by filtration, the solvent was concentrated *in vacuo* to give a dark residue, which was purified by column chromatography on silica gel (DCM/MeOH = 40/1) to afford the desired product.

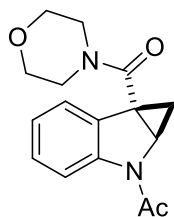

**6**, yellow solid, 88.4 mg, 83% yield over two steps, m.p. = 131.7-132.4 °C. **<sup>1</sup>H NMR** (400 MHz, CDCl<sub>3</sub>) δ 8.20 (d, *J* = 3.2 Hz, 1H), 7.29-7.23 (m, 2H), 7.08-7.05 (m, 1H), 4.22-4.19 (m, 1H), 3.86-3.26 (m, 8H), 2.41 (s, 3H), 1.76-1.73 (m, 1H), 0.77 (dd, *J* = 6.0, 3.2 Hz, 1H). **<sup>13</sup>C NMR** (100 MHz, CDCl<sub>3</sub>) 168.9, 166.5, 141.0, 131.7, 128.5, 123.9, 123.1, 118.3, 66.7, 44.3, 34.1, 24.5, 16.3. **IR** (thin film):  $\nu_{\text{max}}/\text{cm}^{-1}$  = 3089, 2969, 2916, 2860, 1708, 1668, 1639, 1597, 1473, 1428, 1402, 1338, 1298, 1273, 1249, 1198, 1149, 1113, 1088, 1068, 1045, 1019, 987, 955, 934, 914, 877, 854, 809, 766, 742, 707, 619, 601, 554, 525, 462, 441. **HRMS (ESI)** calcd for C<sub>16</sub>H<sub>18</sub>N<sub>2</sub>O<sub>3</sub>Na [M+Na]<sup>+</sup>: 309.1210, found: 309.1209.

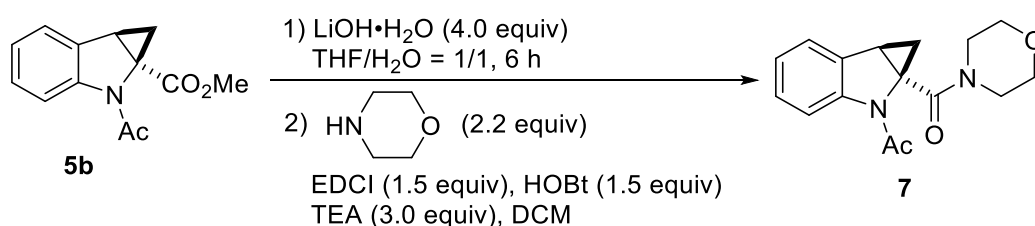

A solution of compound **5b** (128.3 mg, 0.55 mmol, 1.0 equiv) in THF (3 mL) was slowly added to a solution of LiOH·H<sub>2</sub>O (92.4 mg, 1.48 mmol, 4.0 equiv) in water (3 mL). The resulting mixture was vigorously stirred at room temperature for 6 h. THF was then evaporated under reduced pressure. The resulting aqueous solution was acidified with 2M HCl to pH = 2, and then extracted with DCM (25 mL×3). The combined organic layers were dried over anhydrous Na<sub>2</sub>SO<sub>4</sub>. After removal of Na<sub>2</sub>SO<sub>4</sub> by filtration, the solvent was concentrated *in vacuo* by rotary evaporation. The product was used directly without further purification.

To a solution of the above obtained carboxylic acid (0.55 mmol) in DCM (5 mL) were added HOBt (111.5 mg, 0.83 mmol, 1.5 equiv), EDCI (158.2 mg, 0.56 mmol, 1.5 equiv) at room temperature under argon. After stirring for 5 minutes, morpholine (105.4 μL, 1.21 mmol, 2.2 equiv) and triethylamine (191 μL, 1.38 mmol, 2.5 equiv) were added slowly. The reaction mixture was stirred at room temperature overnight. The mixture was quenched with H<sub>2</sub>O (10 mL) and extracted with DCM (25 mL×3). The

combined organic layers were dried over anhydrous Na<sub>2</sub>SO<sub>4</sub>. After removal of Na<sub>2</sub>SO<sub>4</sub> by filtration, the solvent was concentrated *in vacuo* to give a dark residue, which was purified by column chromatography on silica gel (DCM/MeOH = 40/1) to afford the desired product.

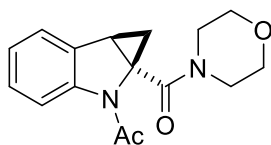

**7**, yellow solid, 96.6 mg, 61% yield over two steps, m.p. = 131.3-133.5 °C. <sup>1</sup>H NMR (400 MHz, CDCl<sub>3</sub>) δ 8.10 (brs, 1H), 7.32-7.30 (m, 1H), 7.23-7.19 (m, 1H), 7.07-7.03 (m, 1H), 3.65-3.10 (m, 8H), 2.88 (dd, *J* = 9.2, 4.8 Hz, 1H), 2.29 (s, 3H), 2.07 (dd, *J* = 9.2, 5.6 Hz, 1H), 0.80-0.78 (m, 1H). <sup>13</sup>C NMR (100 MHz, CDCl<sub>3</sub>) 170.3, 166.7, 142.6, 130.8, 128.1, 124.4, 118.5, 66.7, 50.5, 46.5, 43.6, 30.2, 24.3, 16.6. IR (thin film): ν<sub>max</sub>/cm<sup>-1</sup> = 3005, 2970, 2920, 2860, 2110, 1931, 1678, 1640, 1459, 1424, 1376, 1319, 1271, 1249, 1196, 1113, 1064, 1026, 970, 946, 869, 838, 786, 765, 720, 683, 663, 644, 613, 576, 483, 441. HRMS (ESI) calcd for C<sub>16</sub>H<sub>18</sub>N<sub>2</sub>O<sub>3</sub>Na [M+Na]<sup>+</sup>: 309.1210, found: 309.1212.

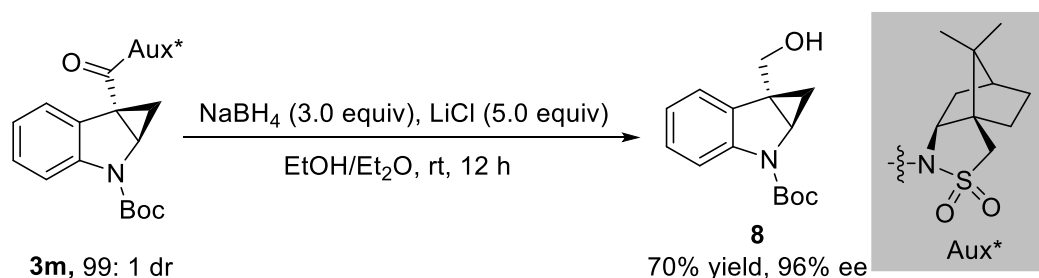

To a solution of compound **3m** (94.5 mg, 0.2 mmol, 1.0 equiv) in EtOH/Et<sub>2</sub>O (1 mL, 3/1) were added LiCl (42 mg, 1.0 mmol, 5.0 equiv) and NaBH<sub>4</sub> (22.7 mg, 0.6 mmol, 3.0 equiv). The resulting mixture was vigorously stirred at room temperature for 24 h. The mixture was quenched with saturated NH<sub>4</sub>Cl aqueous solution and extracted with DCM (25 mL×3). The combined organic layers were dried over anhydrous Na<sub>2</sub>SO<sub>4</sub>. After removal of Na<sub>2</sub>SO<sub>4</sub> by filtration, the solvent was concentrated *in vacuo* to give a dark residue, which was purified by column chromatography on silica gel (PE/EtOAc = 4/1) to afford the chiral alcohol in 70% yield with 96% ee.

The racemic product was prepared by using **3a** instead of **3m**.

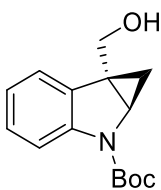

**8**, colorless oil, 36.5 mg, 70% yield, 96% ee. **<sup>1</sup>H NMR** (400 MHz, CDCl<sub>3</sub>) δ 7.83 (brs, 1H), 7.42 (d, *J* = 7.2 Hz, 1H), 7.20-7.16 (m, 1H), 7.01-6.98 (m, 1H), 4.16, (d, *J* = 12.0 Hz, 1H), 4.14 (brs, 1H), 3.87 (d, *J* = 11.6 Hz, 1H), 1.69-1.59 (m, 10H), 1.19-1.16 (m, 1H), 0.44 (dd, *J* = 5.6, 2.8 Hz, 1H). **<sup>13</sup>C NMR** (100 MHz, d<sub>6</sub>-DMSO, 110 °C) δ 151.2, 140.7, 134.1, 125.8, 122.6, 121.1, 114.3, 80.3, 60.6, 41.3, 30.5, 27.6, 13.4. **IR** (thin film):  $\nu_{\max}/\text{cm}^{-1}$  = 3409, 3051, 2976, 2928, 2872, 1700, 1677, 1605, 1480, 1433, 1388, 1344, 1327, 1251, 1152, 1099, 1059, 1022, 932, 886, 846, 815, 749, 719, 685, 636, 586, 559, 465. **HRMS (EI)** calcd for C<sub>15</sub>H<sub>19</sub>NO<sub>3</sub> [M]<sup>+</sup>: 261.1359, found: 261.1356.  $[\alpha]_{\text{D}}^{27}$  = -45.5 (*c* = 1, CHCl<sub>3</sub>). HPLC (AD-H, n-hexane/2-propanol = 98/02, flow rate = 1.0 mL/min,  $\lambda$  = 254 nm) *t<sub>R</sub>* = 28.21 min (minor), 30.99 min (major).

## 6. Stern-Volmer Luminescence Quenching Studies

Stern-Volmer quenching experiments were conducted on a Hitachi F4600 Fluorescence Spectrophotometer. Stern-Volmer luminescence quenching experiments were run with freshly prepared solutions of  $1.0 \times 10^{-3}$  M [Ir(dFCF<sub>3</sub>bpy)(dtbbpy)]PF<sub>6</sub> and the appropriate amount of quencher in DMSO at room temperature. After degassing with argon for 5 min, the emission spectra of the samples were collected. The solutions were irradiated at 340 nm and luminescence was measured at 550 nm. The data summarized in the tables are the phosphorescence intensity measured three times for each sample. The data illustrated in the graphs are the average of three experiments.

**Table S3:** Luminescence quenching data for [Ir(dFCF<sub>3</sub>bpy)(dtbbpy)]PF<sub>6</sub> and **1a** in DMSO.

| Vial | 1    | 2    | 3    | Average | I <sub>0</sub> /I | [1a]    |
|------|------|------|------|---------|-------------------|---------|
| 0    | 1421 | 1322 | 1349 | 1364    | 0                 | 0       |
| 1    | 1336 | 1312 | 1301 | 1316    | 1.036             | 0.00005 |
| 2    | 1344 | 1280 | 1290 | 1305    | 0.957             | 0.0001  |

|   |      |      |      |      |       |        |
|---|------|------|------|------|-------|--------|
| 3 | 1305 | 1267 | 1206 | 1259 | 1.037 | 0.0002 |
| 4 | 1423 | 1448 | 1377 | 1416 | 1.085 | 0.0004 |
| 5 | 1503 | 1496 | 1423 | 1474 | 0.961 | 0.0006 |
| 6 | 1265 | 1221 | 1096 | 1194 | 0.843 | 0.0008 |
| 7 | 1574 | 1547 | 1521 | 1547 | 0.772 | 0.001  |

**Table S4:** Luminescence quenching data for [Ir(dFCF<sub>3</sub>bpy)(dtbbpy)]PF<sub>6</sub> and **4b** in DMSO.

| Vial | 1    | 2    | 3    | Average | I <sub>0</sub> /I | [4b]    |
|------|------|------|------|---------|-------------------|---------|
| 0    | 2368 | 2119 | 2068 | 2185    | 1                 | 0       |
| 1    | 1998 | 1990 | 1970 | 1986    | 1.10              | 0.00005 |
| 2    | 2177 | 2177 | 2174 | 2176    | 1.00              | 0.0001  |
| 3    | 1779 | 1888 | 1902 | 1856    | 1.18              | 0.0002  |
| 4    | 1790 | 1786 | 1778 | 1784    | 1.22              | 0.0004  |
| 5    | 1597 | 1575 | 1571 | 1581    | 1.38              | 0.0006  |
| 6    | 1375 | 1378 | 1386 | 1379    | 1.58              | 0.0008  |
| 7    | 1148 | 1125 | 1099 | 1124    | 1.68              | 0.001   |

**Table S5:** Luminescence quenching data for [Ir(dFCF<sub>3</sub>bpy)(dtbbpy)]PF<sub>6</sub> and **2** in DMSO.

| Vial | 1    | 2    | 3    | Average | I <sub>0</sub> /I | [2]     |
|------|------|------|------|---------|-------------------|---------|
| 0    | 1448 | 1433 | 1422 | 1434    | 1                 | 0       |
| 1    | 1284 | 1267 | 1258 | 1269    | 1.13              | 0.00005 |
| 3    | 919  | 910  | 899  | 909.    | 1.29              | 0.0002  |
| 4    | 637  | 632  | 629  | 633     | 1.58              | 0.0004  |
| 5    | 448  | 442  | 438  | 443     | 2.26              | 0.0006  |
| 6    | 146  | 145  | 144  | 145     | 3.24              | 0.0008  |
| 7    | 364  | 359  | 358  | 360     | 3.97              | 0.001   |

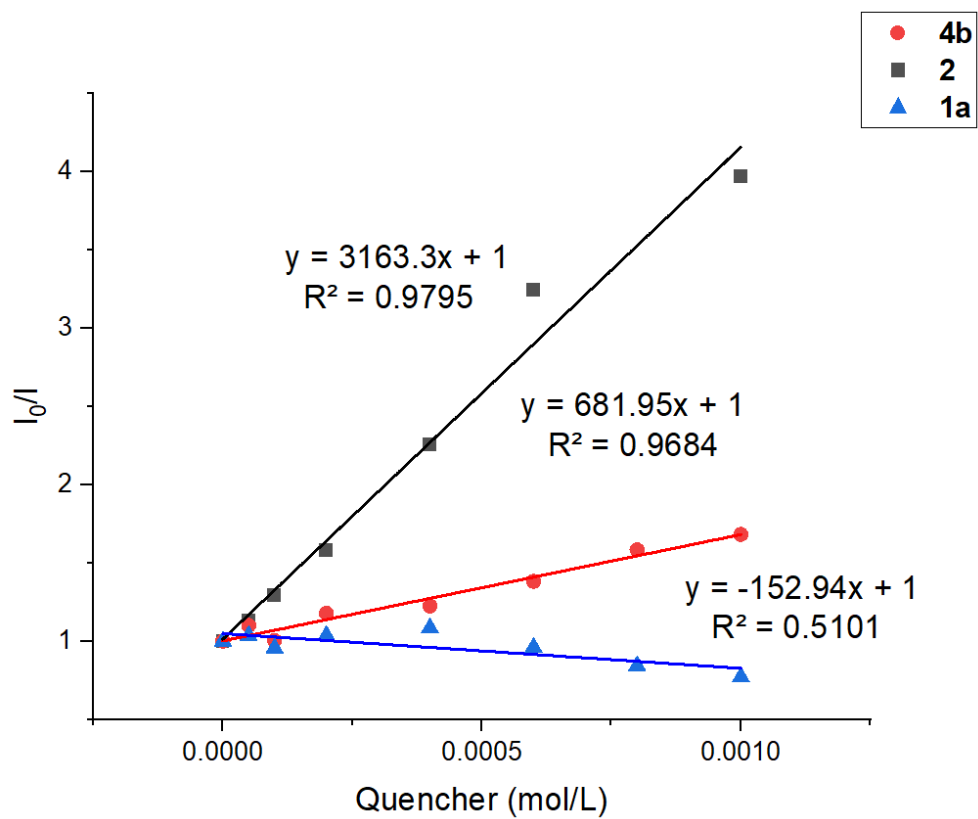

**Figure S1:** Luminescence quenching of  $[\text{Ir}(\text{dFCF}_3\text{bpy})(\text{dtbbpy})]\text{PF}_6$  with varying concentrations of **1a** (blue), **4b** (red) and **2** (black) in DMSO.

## 7. X-Ray Crystal Data of 5m

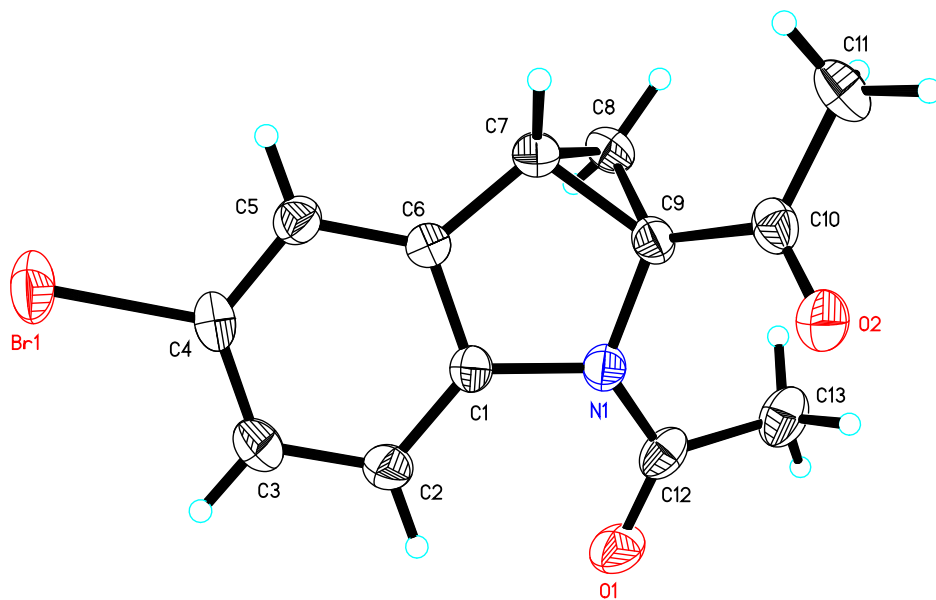

**Figure S2.** X-ray structure of **5m**. (The crystal was obtained by slow evaporation of the solution of DCM at 0 °C) (CCDC 2184389):



Table S6. Crystal data and structure refinement for mo\_d8v191167\_0m.

|                                   |                                             |                       |
|-----------------------------------|---------------------------------------------|-----------------------|
| Identification code               | mo_d8v191167_0m                             |                       |
| Empirical formula                 | C13 H12 Br N O2                             |                       |
| Formula weight                    | 294.15                                      |                       |
| Temperature                       | 293(2) K                                    |                       |
| Wavelength                        | 0.71073 Å                                   |                       |
| Crystal system                    | Orthorhombic                                |                       |
| Space group                       | P 21 21 21                                  |                       |
| Unit cell dimensions              | a = 9.3599(9) Å                             | $\alpha = 90^\circ$ . |
|                                   | b = 11.1041(9) Å                            | $\beta = 90^\circ$ .  |
|                                   | c = 11.8507(11) Å                           | $\gamma = 90^\circ$ . |
| Volume                            | 1231.68(19) Å <sup>3</sup>                  |                       |
| Z                                 | 4                                           |                       |
| Density (calculated)              | 1.586 Mg/m <sup>3</sup>                     |                       |
| Absorption coefficient            | 3.326 mm <sup>-1</sup>                      |                       |
| F(000)                            | 592                                         |                       |
| Crystal size                      | 0.180 x 0.150 x 0.110 mm <sup>3</sup>       |                       |
| Theta range for data collection   | 2.514 to 25.470°.                           |                       |
| Index ranges                      | -9<=h<=11, -13<=k<=13, -14<=l<=12           |                       |
| Reflections collected             | 5815                                        |                       |
| Independent reflections           | 2290 [R(int) = 0.0410]                      |                       |
| Completeness to theta = 25.242°   | 99.8 %                                      |                       |
| Absorption correction             | Semi-empirical from equivalents             |                       |
| Max. and min. transmission        | 0.7456 and 0.4528                           |                       |
| Refinement method                 | Full-matrix least-squares on F <sup>2</sup> |                       |
| Data / restraints / parameters    | 2290 / 0 / 156                              |                       |
| Goodness-of-fit on F <sup>2</sup> | 1.050                                       |                       |
| Final R indices [I>2sigma(I)]     | R1 = 0.0451, wR2 = 0.1023                   |                       |
| R indices (all data)              | R1 = 0.0727, wR2 = 0.1135                   |                       |
| Absolute structure parameter      | 0.467(9)                                    |                       |
| Extinction coefficient            | n/a                                         |                       |
| Largest diff. peak and hole       | 0.357 and -0.266 e.Å <sup>-3</sup>          |                       |

Table S7. Atomic coordinates ( $\times 10^4$ ) and equivalent isotropic displacement parameters ( $\text{\AA}^2 \times 10^3$ ) for mo\_d8v191167\_0m.  $U(\text{eq})$  is defined as one third of the trace of the orthogonalized  $U^{ij}$  tensor.

|       | x        | y       | z       | U(eq) |
|-------|----------|---------|---------|-------|
| Br(1) | 4621(1)  | 8833(1) | 4346(1) | 75(1) |
| O(1)  | 3928(7)  | 3200(5) | 6911(4) | 63(2) |
| O(2)  | 4631(7)  | 1597(4) | 3760(4) | 60(1) |
| N(1)  | 3620(6)  | 3504(5) | 5047(4) | 41(1) |
| C(1)  | 3979(8)  | 4753(6) | 5030(6) | 40(2) |
| C(2)  | 4651(9)  | 5441(6) | 5829(6) | 50(2) |
| C(3)  | 4864(8)  | 6661(6) | 5625(7) | 54(2) |
| C(4)  | 4373(8)  | 7158(6) | 4624(6) | 50(2) |
| C(5)  | 3688(8)  | 6489(6) | 3823(6) | 45(2) |
| C(6)  | 3490(8)  | 5268(6) | 4030(5) | 39(2) |
| C(7)  | 2811(8)  | 4353(6) | 3302(6) | 43(2) |
| C(8)  | 1530(8)  | 3714(7) | 3748(6) | 49(2) |
| C(9)  | 2977(8)  | 3177(6) | 3969(6) | 42(2) |
| C(10) | 3572(9)  | 2084(6) | 3405(6) | 47(2) |
| C(11) | 2796(10) | 1623(8) | 2374(6) | 64(2) |
| C(12) | 3454(9)  | 2851(6) | 6021(6) | 48(2) |
| C(13) | 2624(9)  | 1697(7) | 5922(7) | 62(2) |

Table S8. Bond lengths [ $\text{\AA}$ ] and angles [ $^\circ$ ] for mo\_d8v191167\_0m.

---

|                 |           |
|-----------------|-----------|
| Br(1)-C(4)      | 1.902(6)  |
| O(1)-C(12)      | 1.208(9)  |
| O(2)-C(10)      | 1.204(9)  |
| N(1)-C(12)      | 1.372(8)  |
| N(1)-C(1)       | 1.426(9)  |
| N(1)-C(9)       | 1.458(8)  |
| C(1)-C(2)       | 1.370(10) |
| C(1)-C(6)       | 1.394(10) |
| C(2)-C(3)       | 1.390(10) |
| C(2)-H(2)       | 0.9300    |
| C(3)-C(4)       | 1.388(10) |
| C(3)-H(3)       | 0.9300    |
| C(4)-C(5)       | 1.365(9)  |
| C(5)-C(6)       | 1.390(9)  |
| C(5)-H(5)       | 0.9300    |
| C(6)-C(7)       | 1.476(9)  |
| C(7)-C(8)       | 1.490(10) |
| C(7)-C(9)       | 1.535(9)  |
| C(7)-H(7)       | 0.9800    |
| C(8)-C(9)       | 1.503(10) |
| C(8)-H(8A)      | 0.9700    |
| C(8)-H(8B)      | 0.9700    |
| C(9)-C(10)      | 1.494(10) |
| C(10)-C(11)     | 1.511(10) |
| C(11)-H(11A)    | 0.9600    |
| C(11)-H(11B)    | 0.9600    |
| C(11)-H(11C)    | 0.9600    |
| C(12)-C(13)     | 1.503(11) |
| C(13)-H(13A)    | 0.9600    |
| C(13)-H(13B)    | 0.9600    |
| C(13)-H(13C)    | 0.9600    |
| C(12)-N(1)-C(1) | 123.5(6)  |
| C(12)-N(1)-C(9) | 123.9(6)  |
| C(1)-N(1)-C(9)  | 109.1(5)  |

|                  |          |
|------------------|----------|
| C(2)-C(1)-C(6)   | 120.6(6) |
| C(2)-C(1)-N(1)   | 129.9(7) |
| C(6)-C(1)-N(1)   | 109.5(6) |
| C(1)-C(2)-C(3)   | 119.3(7) |
| C(1)-C(2)-H(2)   | 120.3    |
| C(3)-C(2)-H(2)   | 120.3    |
| C(4)-C(3)-C(2)   | 119.3(7) |
| C(4)-C(3)-H(3)   | 120.4    |
| C(2)-C(3)-H(3)   | 120.4    |
| C(5)-C(4)-C(3)   | 122.2(6) |
| C(5)-C(4)-Br(1)  | 118.0(6) |
| C(3)-C(4)-Br(1)  | 119.8(5) |
| C(4)-C(5)-C(6)   | 118.1(7) |
| C(4)-C(5)-H(5)   | 120.9    |
| C(6)-C(5)-H(5)   | 120.9    |
| C(5)-C(6)-C(1)   | 120.4(6) |
| C(5)-C(6)-C(7)   | 128.7(6) |
| C(1)-C(6)-C(7)   | 110.8(6) |
| C(6)-C(7)-C(8)   | 117.8(6) |
| C(6)-C(7)-C(9)   | 104.0(6) |
| C(8)-C(7)-C(9)   | 59.6(5)  |
| C(6)-C(7)-H(7)   | 119.6    |
| C(8)-C(7)-H(7)   | 119.6    |
| C(9)-C(7)-H(7)   | 119.6    |
| C(7)-C(8)-C(9)   | 61.7(4)  |
| C(7)-C(8)-H(8A)  | 117.6    |
| C(9)-C(8)-H(8A)  | 117.6    |
| C(7)-C(8)-H(8B)  | 117.6    |
| C(9)-C(8)-H(8B)  | 117.6    |
| H(8A)-C(8)-H(8B) | 114.7    |
| N(1)-C(9)-C(10)  | 116.2(7) |
| N(1)-C(9)-C(8)   | 115.2(6) |
| C(10)-C(9)-C(8)  | 125.5(7) |
| N(1)-C(9)-C(7)   | 106.3(5) |
| C(10)-C(9)-C(7)  | 119.9(6) |
| C(8)-C(9)-C(7)   | 58.7(5)  |
| O(2)-C(10)-C(9)  | 121.0(7) |

|                     |          |
|---------------------|----------|
| O(2)-C(10)-C(11)    | 121.8(7) |
| C(9)-C(10)-C(11)    | 117.2(7) |
| C(10)-C(11)-H(11A)  | 109.5    |
| C(10)-C(11)-H(11B)  | 109.5    |
| H(11A)-C(11)-H(11B) | 109.5    |
| C(10)-C(11)-H(11C)  | 109.5    |
| H(11A)-C(11)-H(11C) | 109.5    |
| H(11B)-C(11)-H(11C) | 109.5    |
| O(1)-C(12)-N(1)     | 121.5(7) |
| O(1)-C(12)-C(13)    | 122.1(7) |
| N(1)-C(12)-C(13)    | 116.3(7) |
| C(12)-C(13)-H(13A)  | 109.5    |
| C(12)-C(13)-H(13B)  | 109.5    |
| H(13A)-C(13)-H(13B) | 109.5    |
| C(12)-C(13)-H(13C)  | 109.5    |
| H(13A)-C(13)-H(13C) | 109.5    |
| H(13B)-C(13)-H(13C) | 109.5    |

---

Symmetry transformations used to generate equivalent atoms:

Table S9. Anisotropic displacement parameters ( $\text{\AA}^2 \times 10^3$ ) for mo\_d8v191167\_0m. The anisotropic displacement factor exponent takes the form:  $-2\pi^2 [ h^2 a^{*2} U^{11} + \dots + 2 h k a^* b^* U^{12} ]$

|       | U <sup>11</sup> | U <sup>22</sup> | U <sup>33</sup> | U <sup>23</sup> | U <sup>13</sup> | U <sup>12</sup> |
|-------|-----------------|-----------------|-----------------|-----------------|-----------------|-----------------|
| Br(1) | 100(1)          | 37(1)           | 87(1)           | -6(1)           | 8(1)            | -12(1)          |
| O(1)  | 87(4)           | 63(3)           | 38(3)           | 6(3)            | -3(3)           | 12(3)           |
| O(2)  | 67(4)           | 48(3)           | 63(3)           | -6(2)           | -1(3)           | 9(3)            |
| N(1)  | 49(4)           | 36(3)           | 39(3)           | 0(2)            | 1(3)            | 0(3)            |
| C(1)  | 42(4)           | 35(3)           | 42(4)           | -2(3)           | 0(3)            | 2(3)            |
| C(2)  | 61(5)           | 49(4)           | 41(4)           | -4(3)           | -8(5)           | 3(4)            |
| C(3)  | 59(5)           | 51(4)           | 53(4)           | -13(4)          | -4(4)           | -5(4)           |
| C(4)  | 54(5)           | 35(3)           | 61(5)           | -6(3)           | 7(4)            | -8(3)           |
| C(5)  | 50(5)           | 44(4)           | 42(4)           | 4(3)            | 1(3)            | 0(4)            |
| C(6)  | 40(4)           | 39(3)           | 38(4)           | 1(3)            | -2(3)           | 0(3)            |
| C(7)  | 49(5)           | 43(4)           | 37(4)           | 1(3)            | -2(4)           | -1(3)           |
| C(8)  | 45(4)           | 52(4)           | 50(4)           | -6(4)           | -7(4)           | -8(4)           |
| C(9)  | 45(5)           | 37(4)           | 44(4)           | -4(3)           | -2(3)           | -5(3)           |
| C(10) | 56(5)           | 39(4)           | 46(4)           | -1(3)           | 7(4)            | -11(4)          |
| C(11) | 72(6)           | 64(5)           | 57(5)           | -26(4)          | 1(4)            | -6(5)           |
| C(12) | 51(5)           | 46(4)           | 48(5)           | 8(3)            | 12(4)           | 15(4)           |
| C(13) | 71(6)           | 51(4)           | 64(5)           | 14(4)           | 17(5)           | 4(4)            |

Table S10. Hydrogen coordinates ( $\times 10^4$ ) and isotropic displacement parameters ( $\text{\AA}^2 \times 10^{-3}$ ) for mo\_d8v191167\_0m.

|        | x    | y    | z    | U(eq) |
|--------|------|------|------|-------|
| H(2)   | 4961 | 5096 | 6501 | 60    |
| H(3)   | 5331 | 7138 | 6154 | 65    |
| H(5)   | 3364 | 6839 | 3158 | 55    |
| H(7)   | 2996 | 4359 | 2488 | 52    |
| H(8A)  | 918  | 3308 | 3208 | 59    |
| H(8B)  | 1032 | 4076 | 4380 | 59    |
| H(11A) | 2821 | 2224 | 1792 | 97    |
| H(11B) | 1821 | 1450 | 2566 | 97    |
| H(11C) | 3251 | 902  | 2108 | 97    |
| H(13A) | 3215 | 1090 | 5581 | 93    |
| H(13B) | 1794 | 1828 | 5462 | 93    |
| H(13C) | 2334 | 1435 | 6659 | 93    |

Table S11. Torsion angles [°] for mo\_d8v191167\_0m.

---

|                       |           |
|-----------------------|-----------|
| C(12)-N(1)-C(1)-C(2)  | 23.2(12)  |
| C(9)-N(1)-C(1)-C(2)   | -177.0(8) |
| C(12)-N(1)-C(1)-C(6)  | -154.8(7) |
| C(9)-N(1)-C(1)-C(6)   | 5.0(8)    |
| C(6)-C(1)-C(2)-C(3)   | -1.1(12)  |
| N(1)-C(1)-C(2)-C(3)   | -178.9(7) |
| C(1)-C(2)-C(3)-C(4)   | 0.9(12)   |
| C(2)-C(3)-C(4)-C(5)   | -0.3(12)  |
| C(2)-C(3)-C(4)-Br(1)  | 178.7(6)  |
| C(3)-C(4)-C(5)-C(6)   | -0.2(12)  |
| Br(1)-C(4)-C(5)-C(6)  | -179.2(6) |
| C(4)-C(5)-C(6)-C(1)   | 0.1(11)   |
| C(4)-C(5)-C(6)-C(7)   | -179.0(7) |
| C(2)-C(1)-C(6)-C(5)   | 0.6(12)   |
| N(1)-C(1)-C(6)-C(5)   | 178.8(7)  |
| C(2)-C(1)-C(6)-C(7)   | 179.8(7)  |
| N(1)-C(1)-C(6)-C(7)   | -2.0(8)   |
| C(5)-C(6)-C(7)-C(8)   | -119.8(8) |
| C(1)-C(6)-C(7)-C(8)   | 61.1(9)   |
| C(5)-C(6)-C(7)-C(9)   | 177.6(8)  |
| C(1)-C(6)-C(7)-C(9)   | -1.6(8)   |
| C(6)-C(7)-C(8)-C(9)   | -90.3(7)  |
| C(12)-N(1)-C(9)-C(10) | -69.8(9)  |
| C(1)-N(1)-C(9)-C(10)  | 130.5(7)  |
| C(12)-N(1)-C(9)-C(8)  | 91.3(8)   |
| C(1)-N(1)-C(9)-C(8)   | -68.4(7)  |
| C(12)-N(1)-C(9)-C(7)  | 153.9(6)  |
| C(1)-N(1)-C(9)-C(7)   | -5.8(8)   |
| C(7)-C(8)-C(9)-N(1)   | 94.4(6)   |
| C(7)-C(8)-C(9)-C(10)  | -106.5(7) |
| C(6)-C(7)-C(9)-N(1)   | 4.4(8)    |
| C(8)-C(7)-C(9)-N(1)   | -109.9(7) |
| C(6)-C(7)-C(9)-C(10)  | -129.9(7) |
| C(8)-C(7)-C(9)-C(10)  | 115.7(8)  |
| C(6)-C(7)-C(9)-C(8)   | 114.3(7)  |



|                       |           |
|-----------------------|-----------|
| N(1)-C(9)-C(10)-O(2)  | -8.6(10)  |
| C(8)-C(9)-C(10)-O(2)  | -167.5(7) |
| C(7)-C(9)-C(10)-O(2)  | 121.5(8)  |
| N(1)-C(9)-C(10)-C(11) | 171.7(6)  |
| C(8)-C(9)-C(10)-C(11) | 12.8(10)  |
| C(7)-C(9)-C(10)-C(11) | -58.3(10) |
| C(1)-N(1)-C(12)-O(1)  | -18.2(11) |
| C(9)-N(1)-C(12)-O(1)  | -175.0(7) |
| C(1)-N(1)-C(12)-C(13) | 160.5(7)  |
| C(9)-N(1)-C(12)-C(13) | 3.7(10)   |

---

Symmetry transformations used to generate equivalent atoms:

Table S12. Hydrogen bonds for mo\_d8v191167\_0m [ $\text{\AA}$  and  $^\circ$ ].

| D-H...A              | d(D-H) | d(H...A) | d(D...A)  | $\angle(\text{DHA})$ |
|----------------------|--------|----------|-----------|----------------------|
| C(2)-H(2)...O(1)     | 0.93   | 2.37     | 2.880(9)  | 114.5                |
| C(5)-H(5)...O(1)#1   | 0.93   | 2.61     | 3.355(9)  | 138.0                |
| C(8)-H(8A)...O(1)#2  | 0.97   | 2.51     | 3.325(9)  | 141.8                |
| C(8)-H(8B)...Br(1)#3 | 0.97   | 3.07     | 3.964(8)  | 154.3                |
| C(13)-H(13A)...O(2)  | 0.96   | 2.59     | 3.178(10) | 119.5                |

Symmetry transformations used to generate equivalent atoms:

#1  $-x+1/2, -y+1, z-1/2$  #2  $x-1/2, -y+1/2, -z+1$  #3  $x-1/2, -y+3/2, -z+1$

## 8. Reference

1. J. P. Phelan, S. B. Lang, J. S. Compton, C. B. Kelly, R. Dykstra, O. Gutierrez and G. A. Molander, Redox-Neutral Photocatalytic Cyclopropanation via Radical/Polar Crossover, *J. Am. Chem. Soc.* 2018, **140**, 8037-8047.

## 9. Copies of NMR Spectra

3a

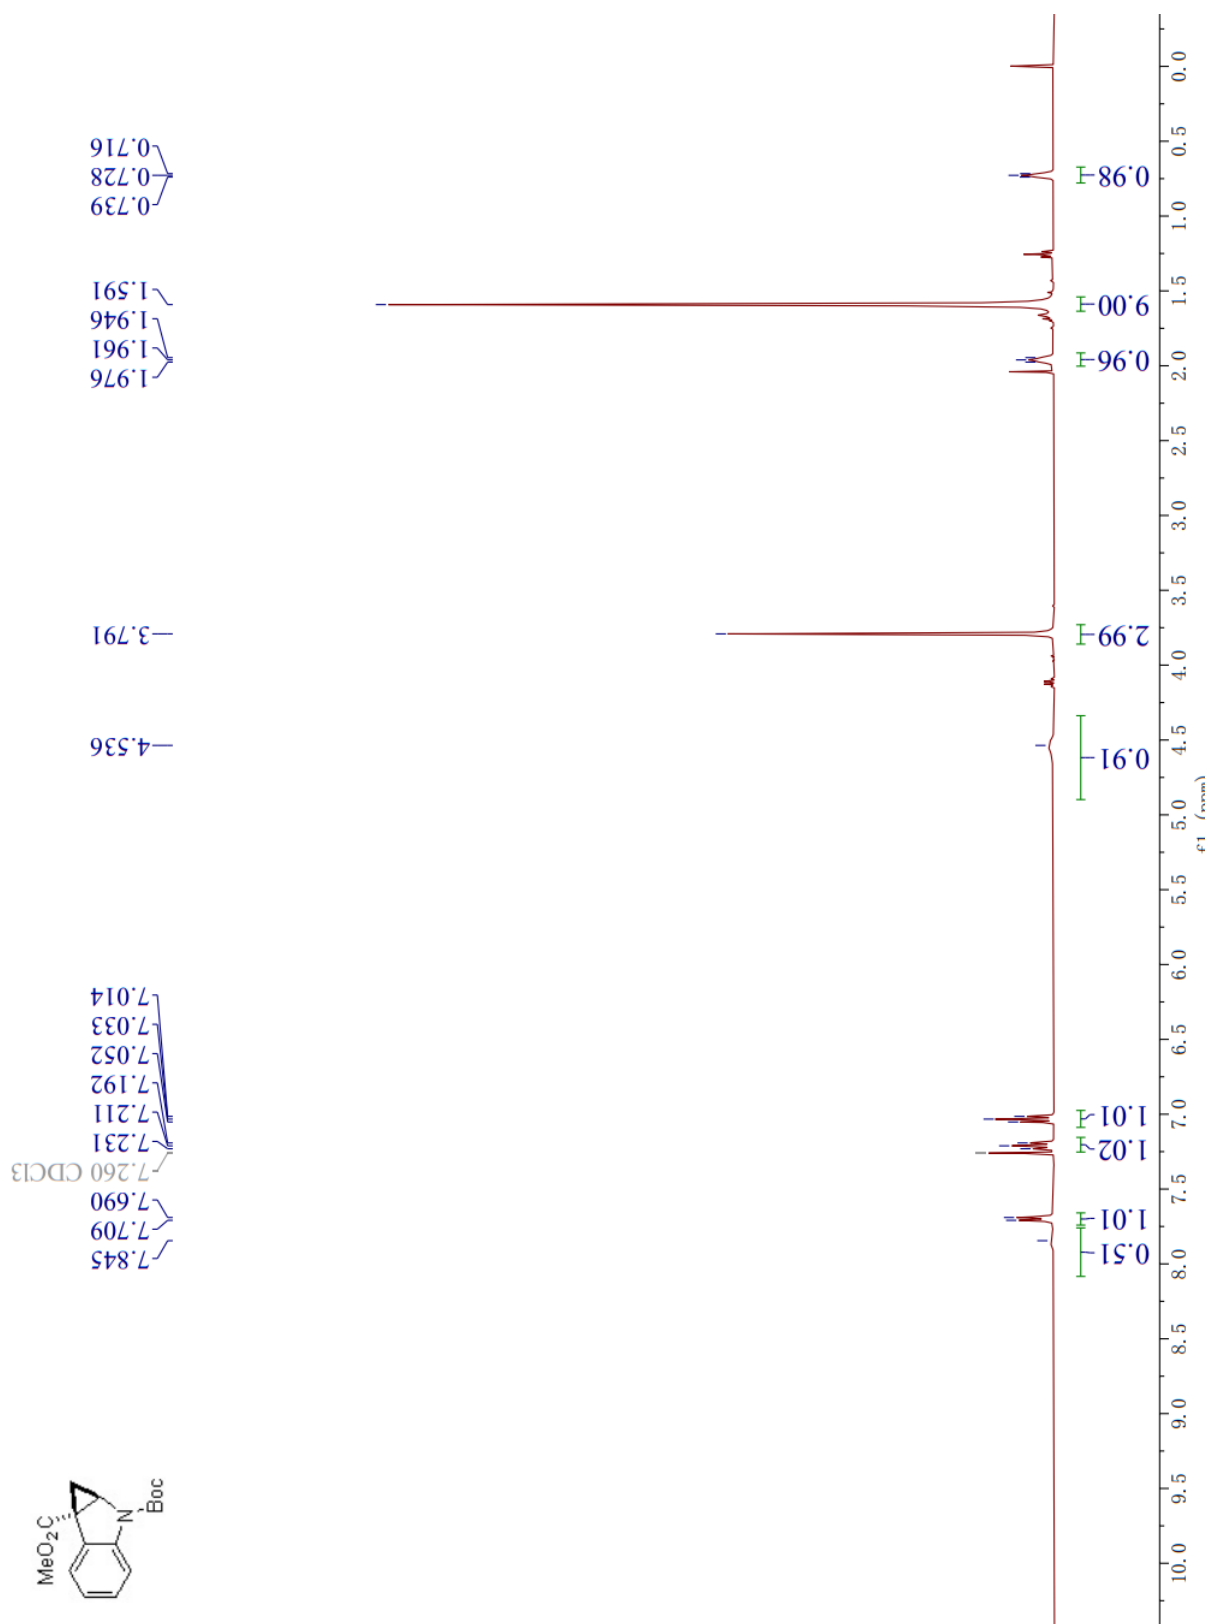

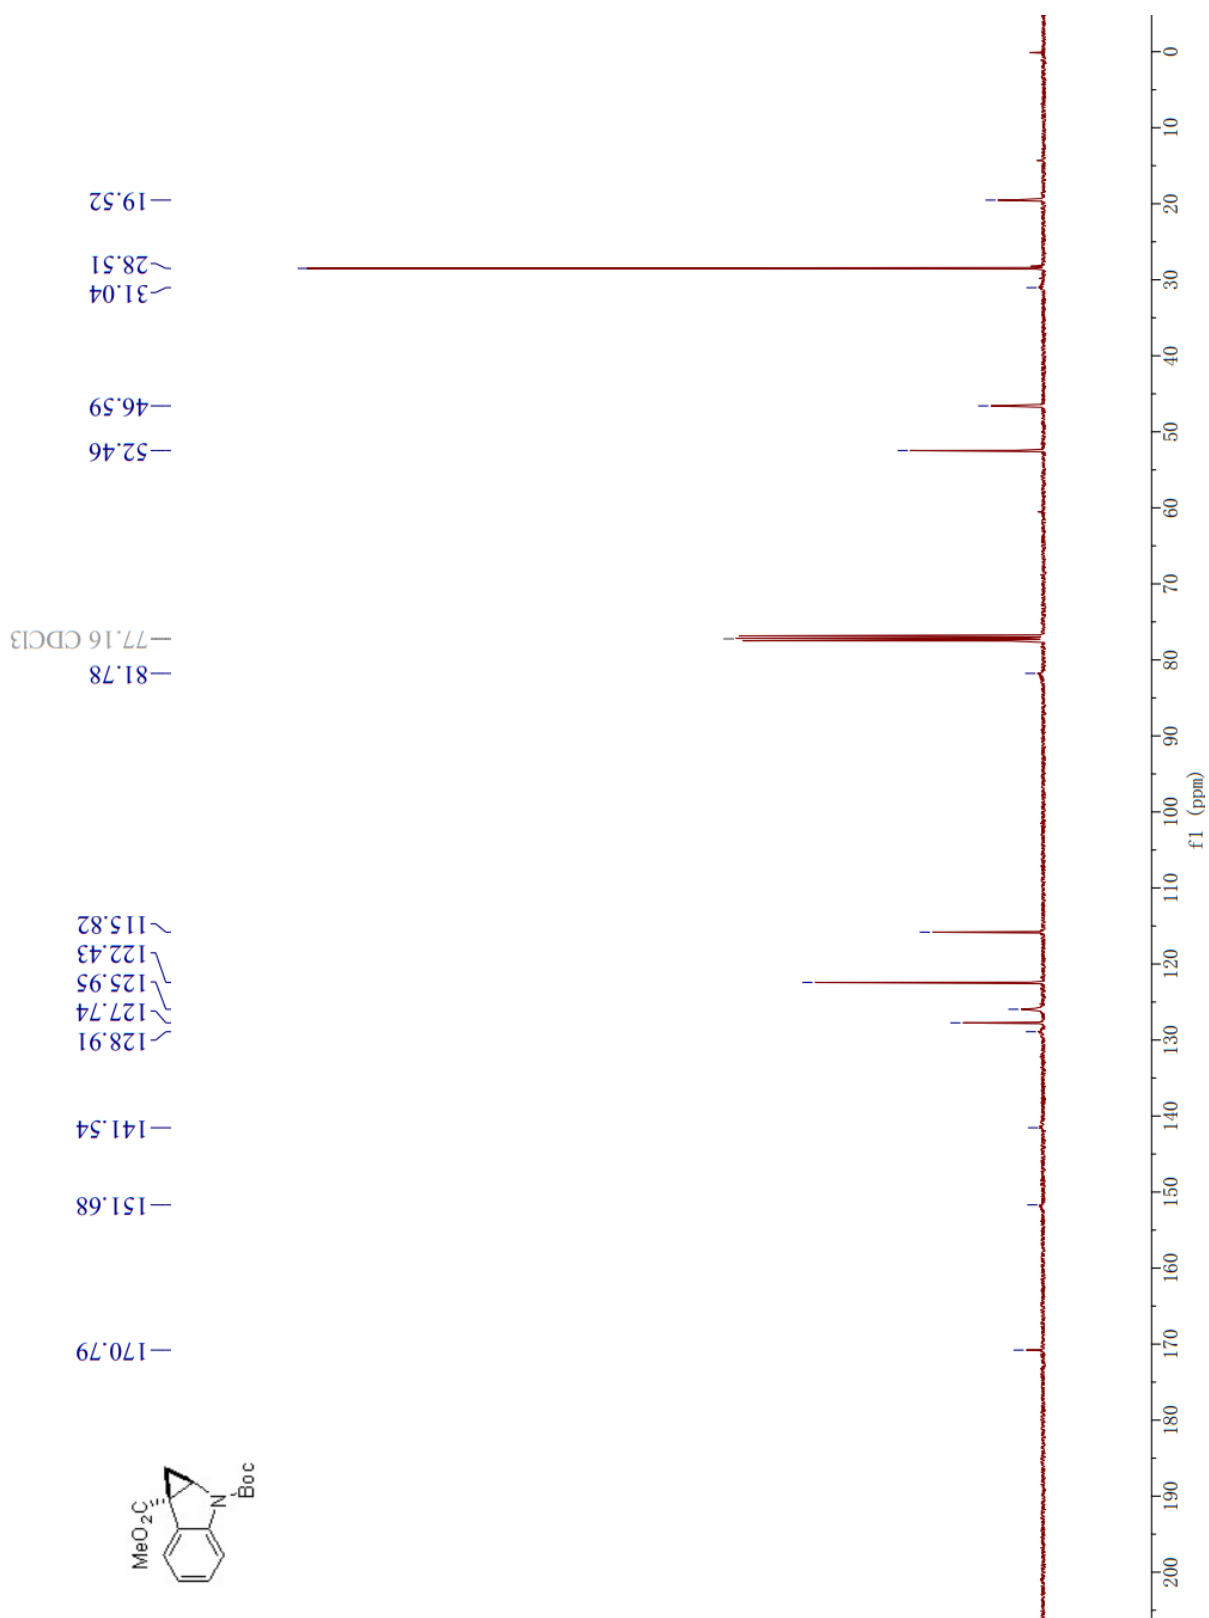

3b

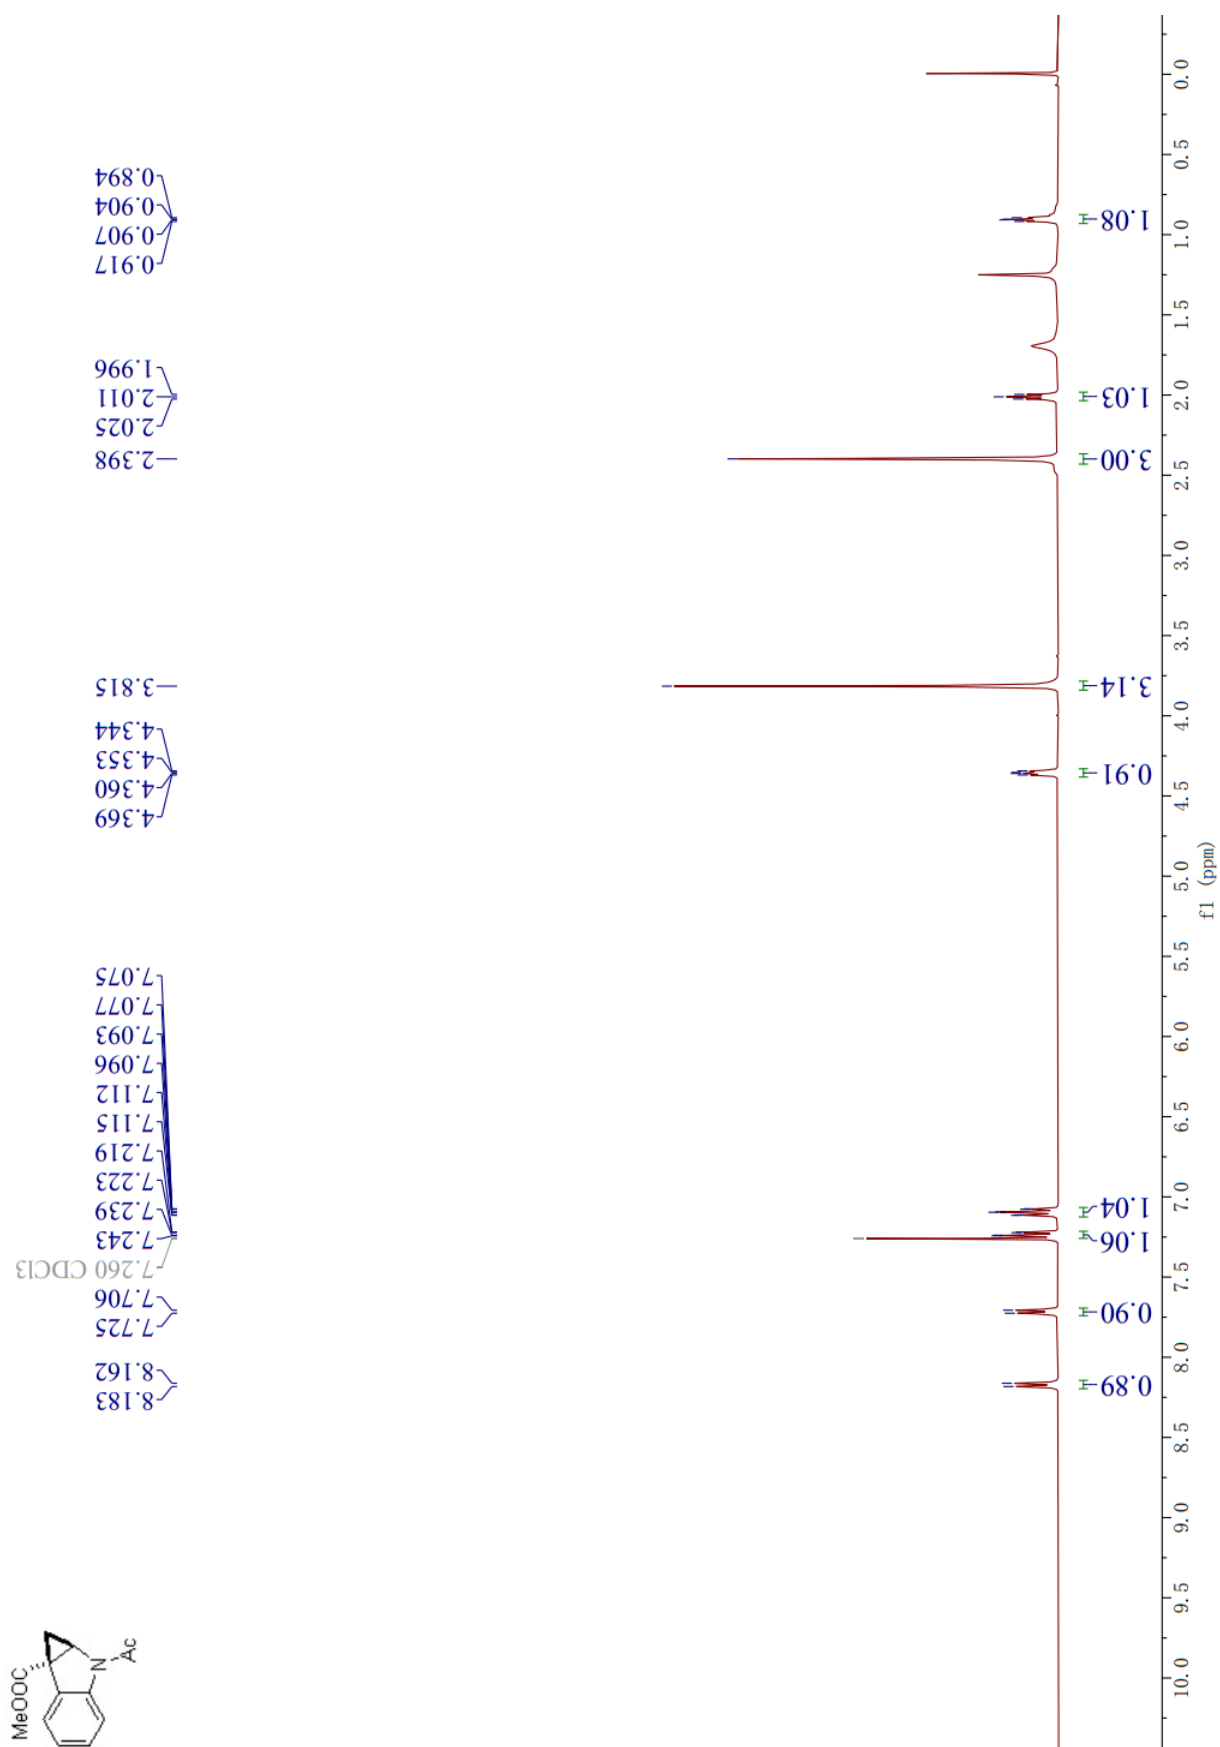

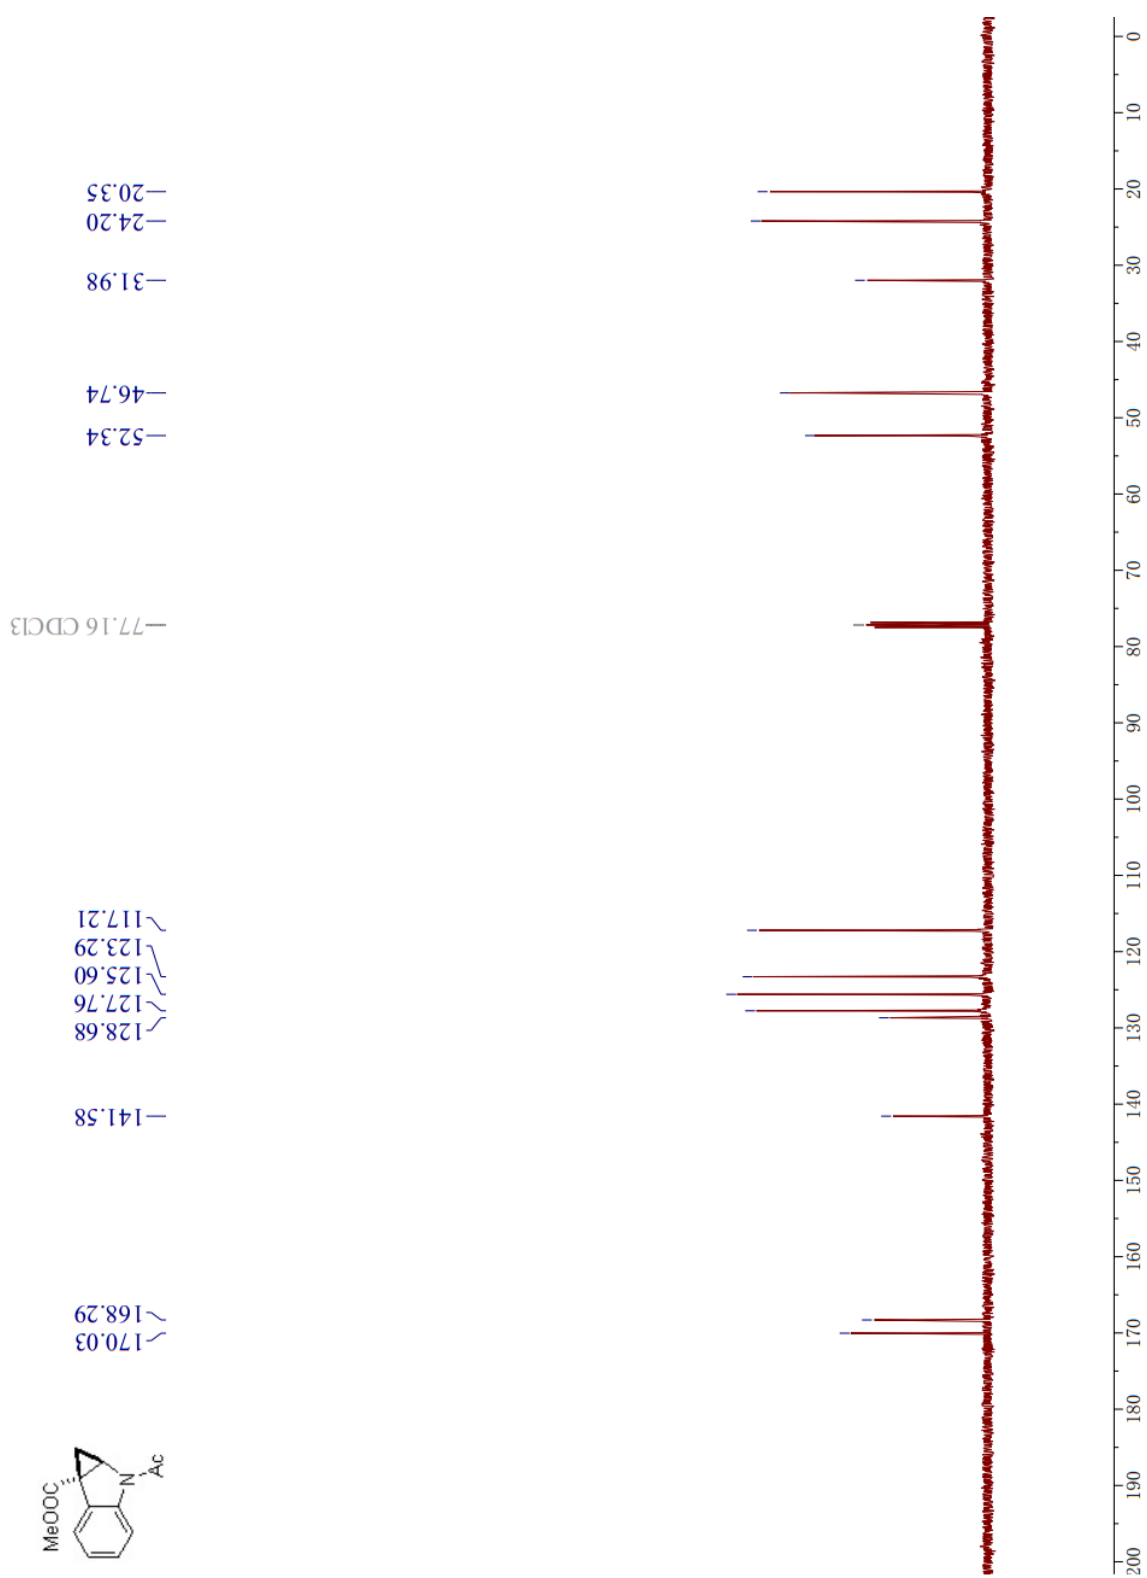

3c

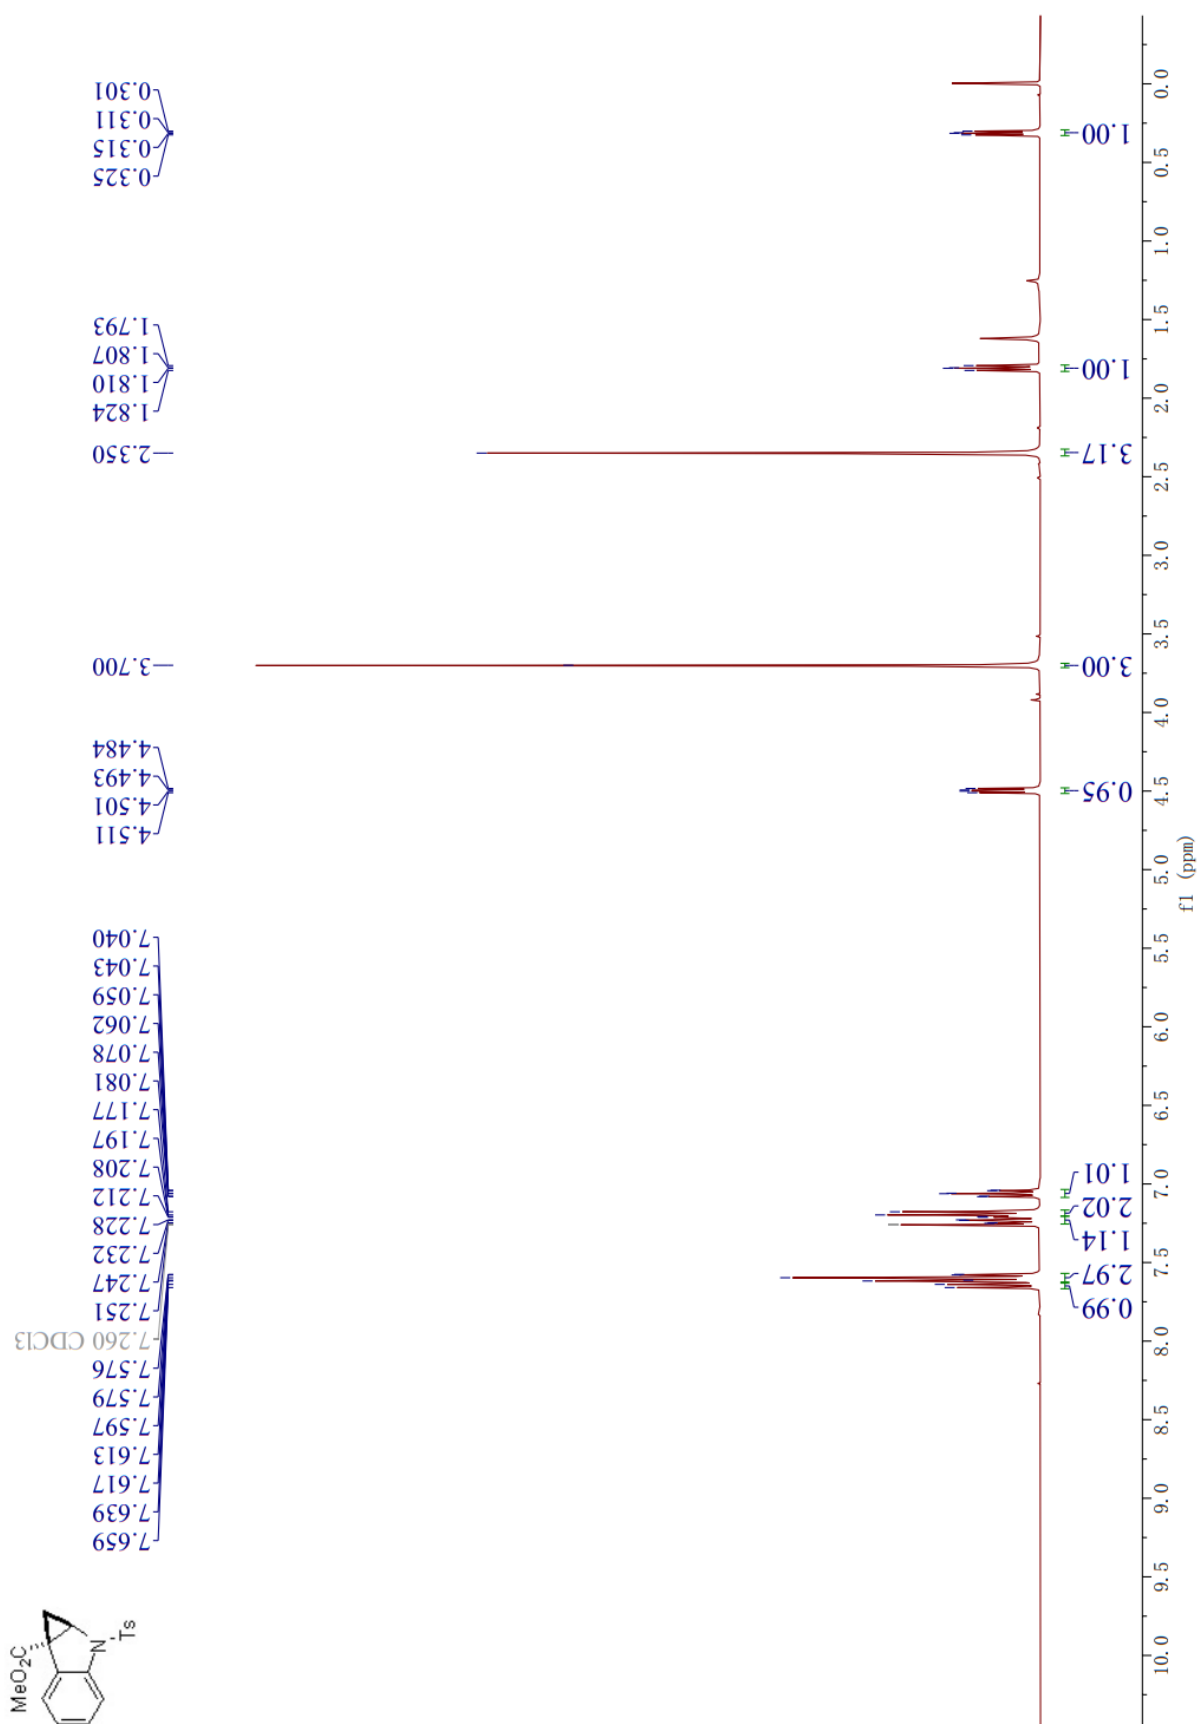

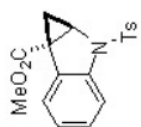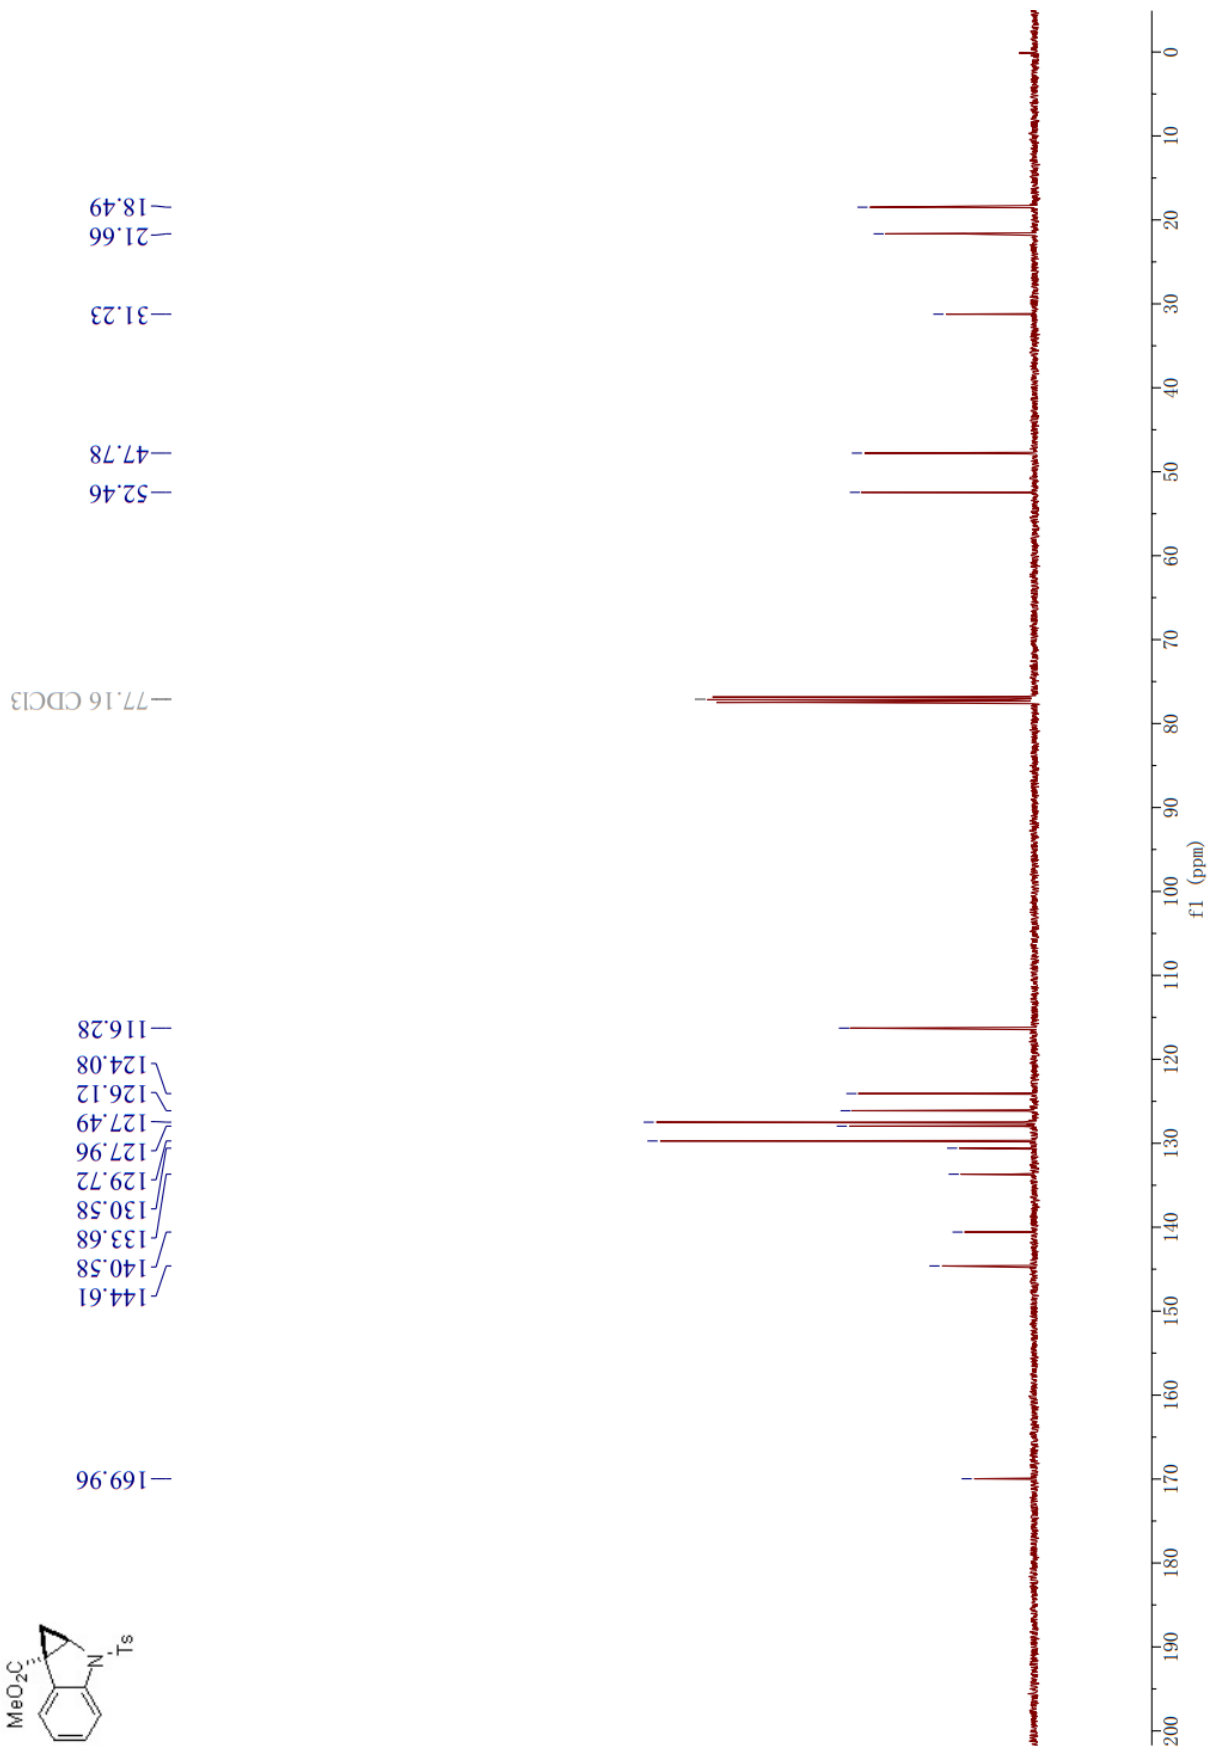



3d

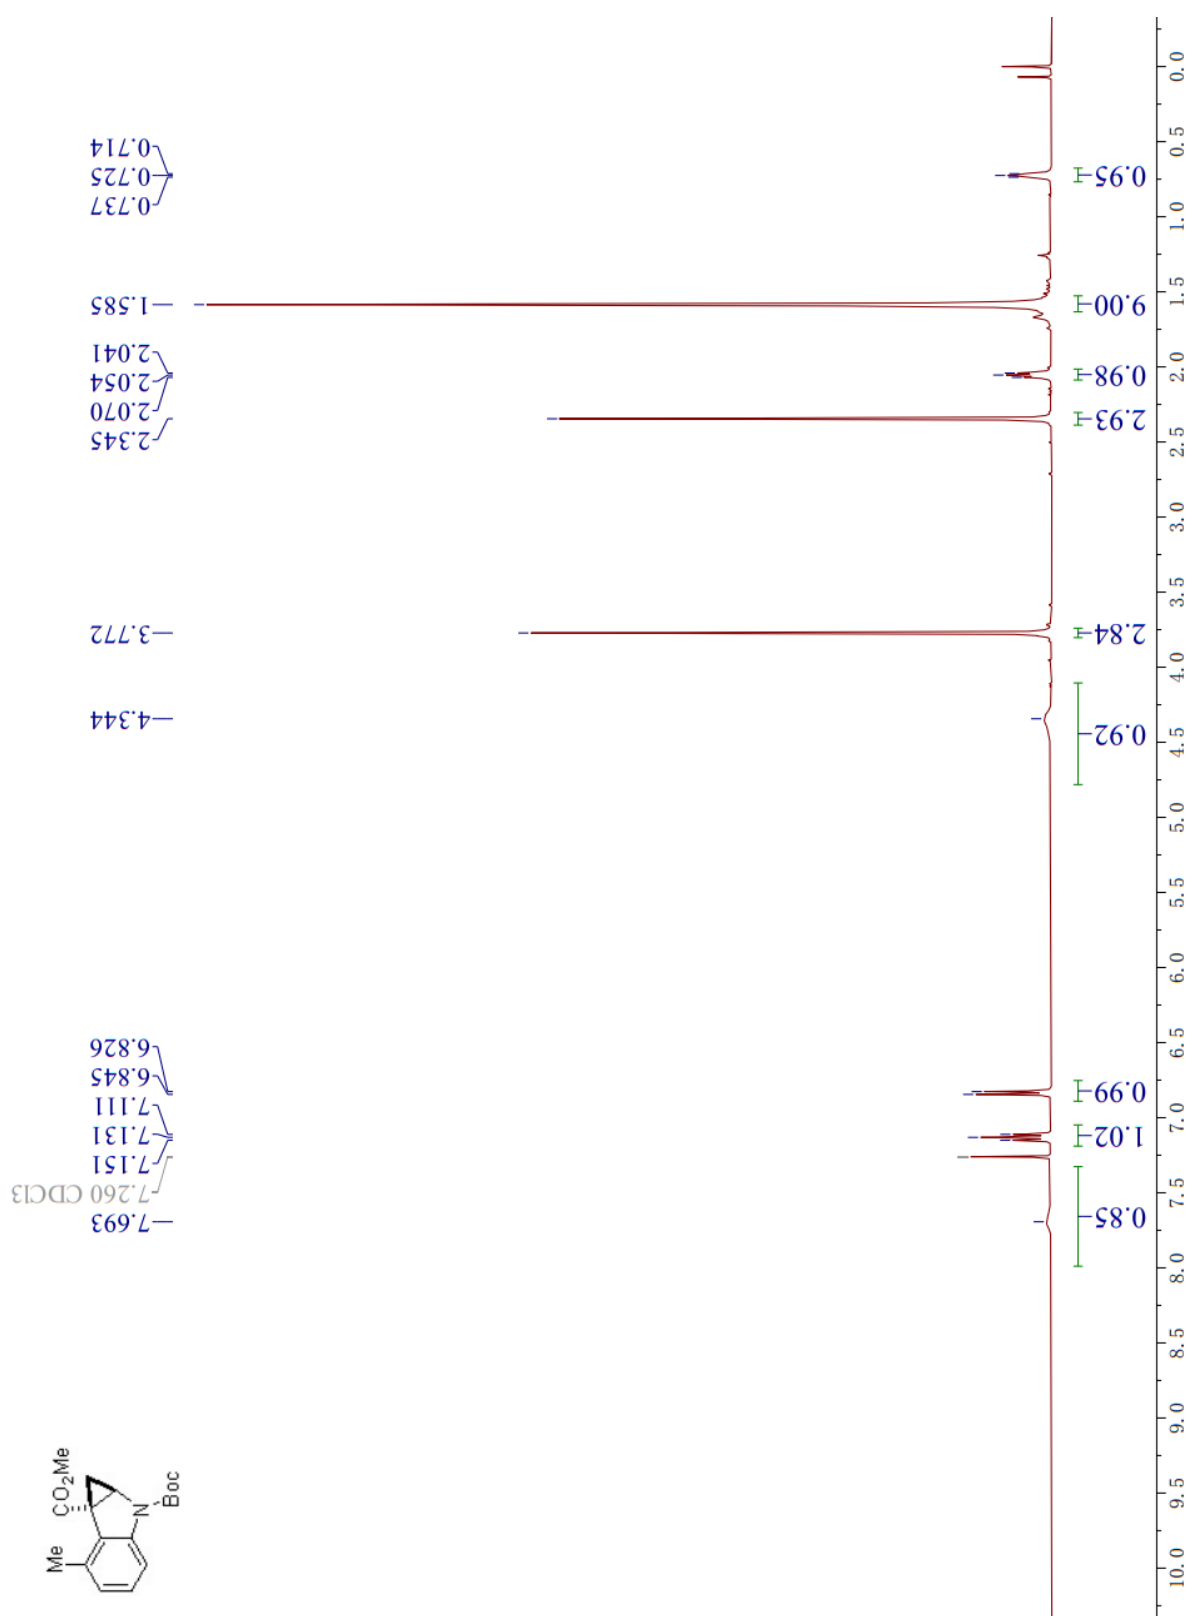

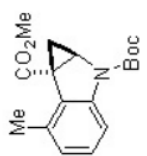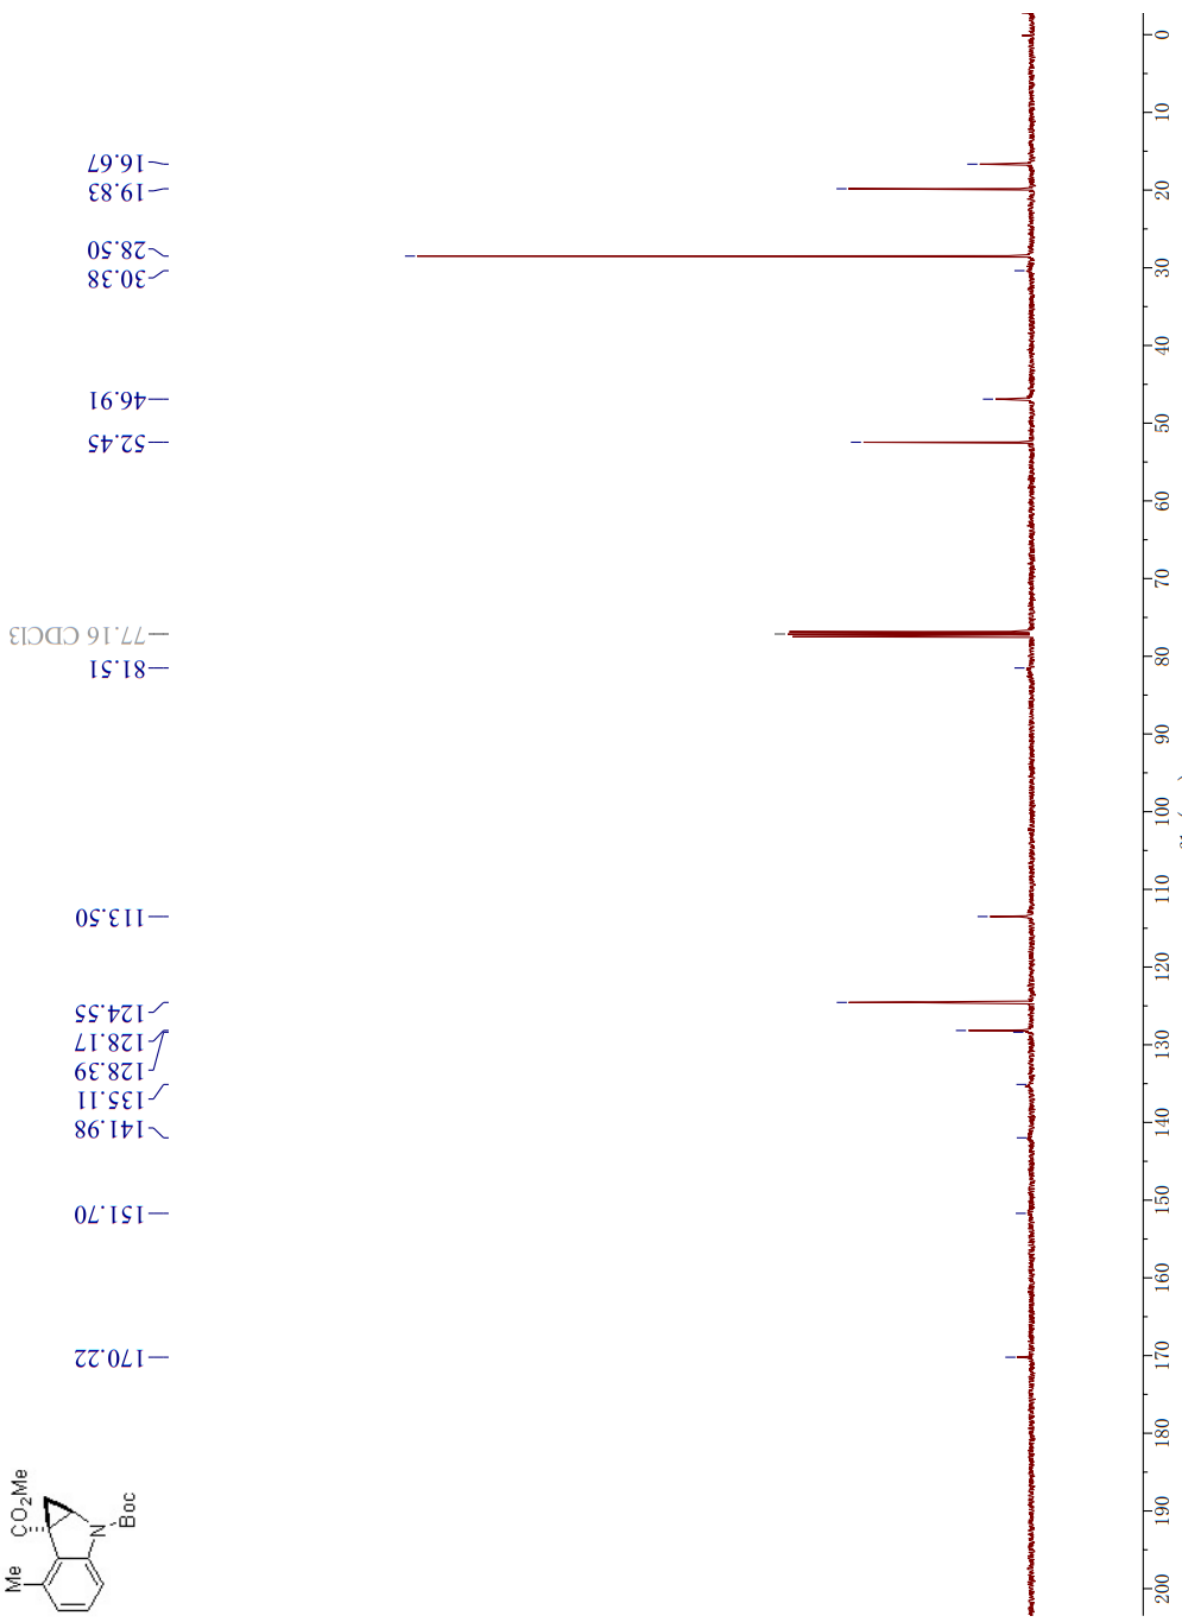

3e

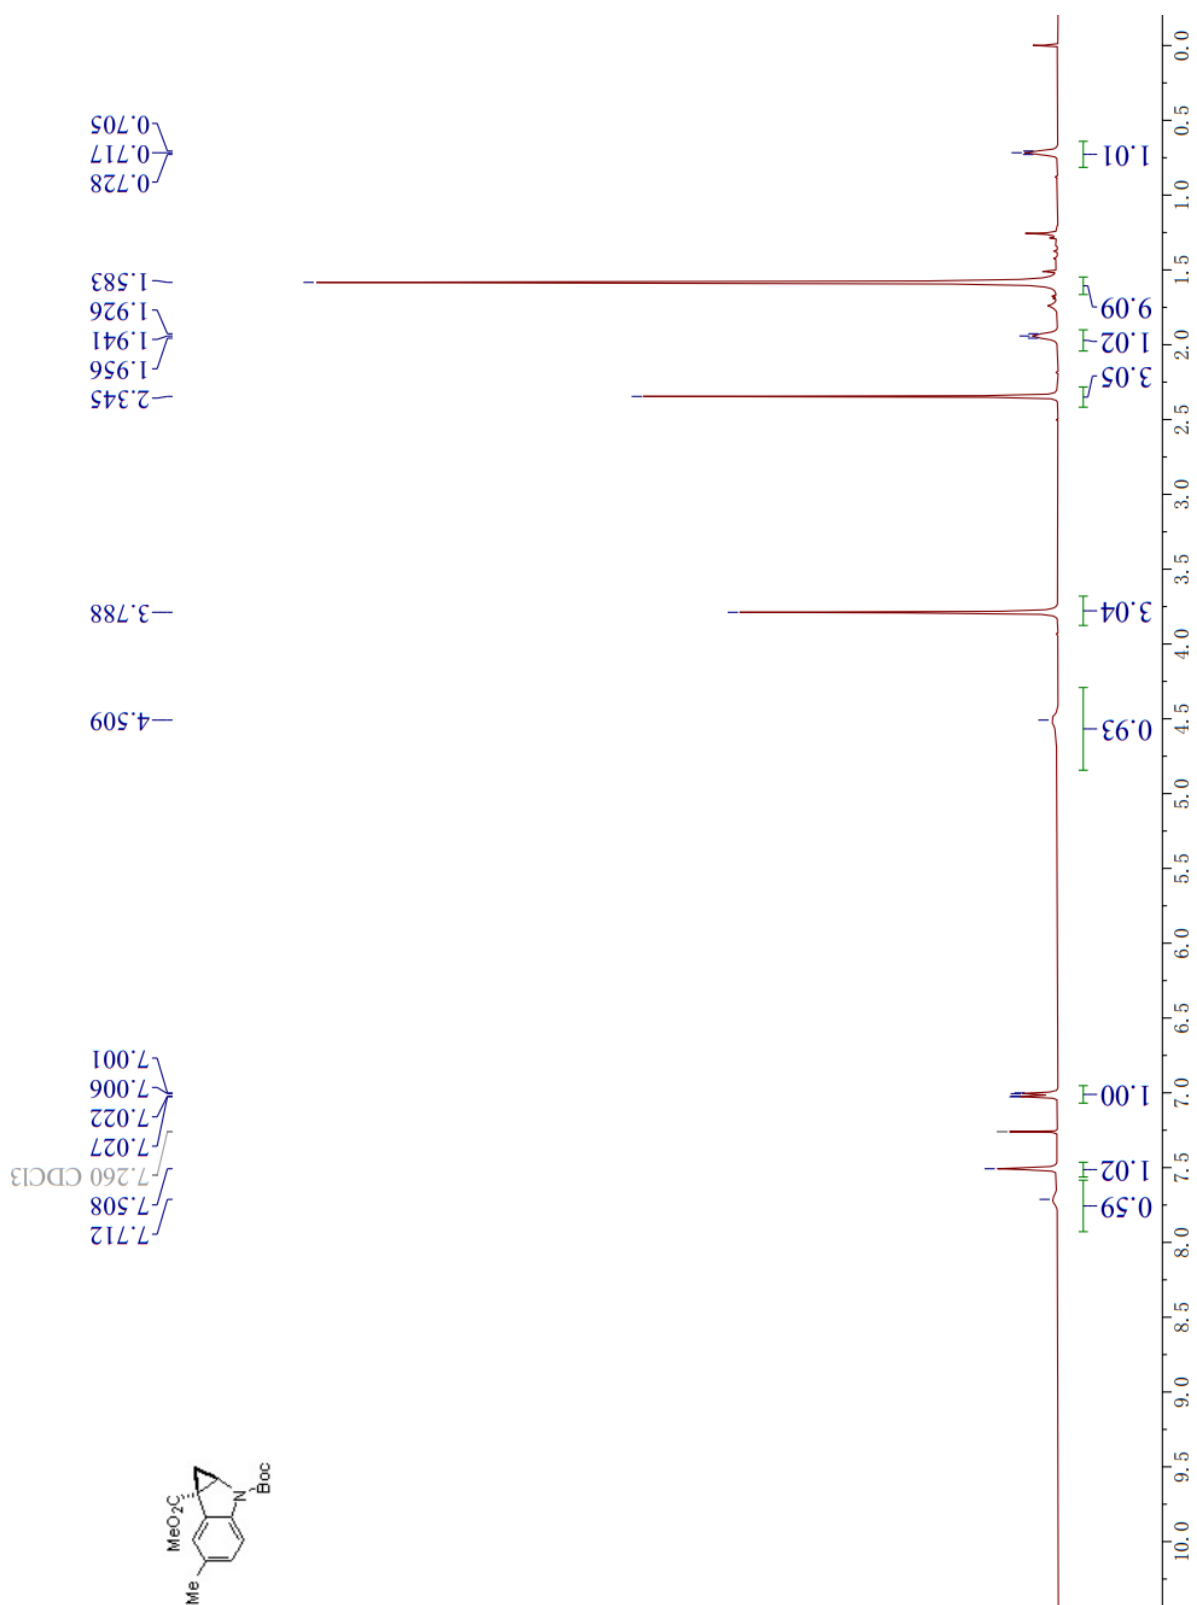

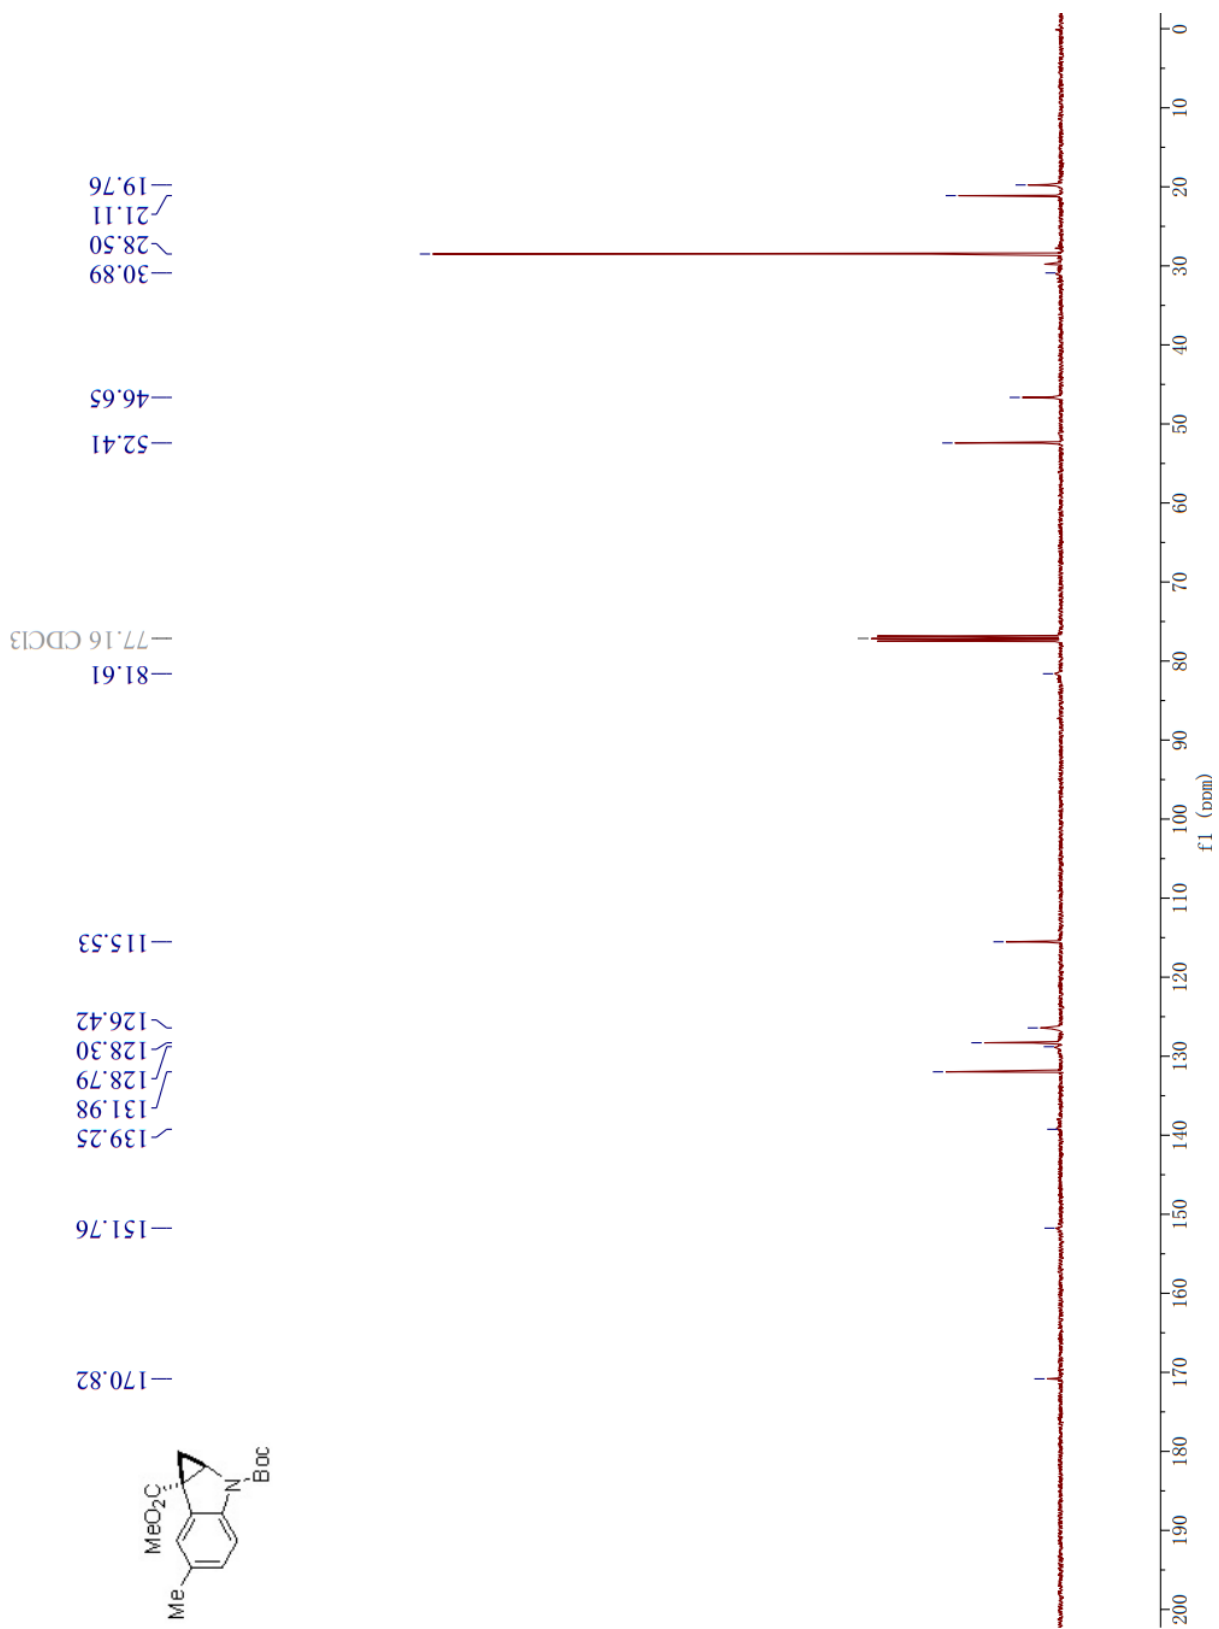

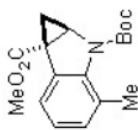

7.579  
7.571  
7.569  
7.564  
7.556  
7.260 CDCl<sub>3</sub>  
7.079  
7.068  
7.060  
7.053  
7.034

4.681  
4.671  
4.663  
4.653

3.807

2.281  
2.028  
2.014  
2.010  
1.997

1.563

0.472  
0.461  
0.459  
0.448

3f

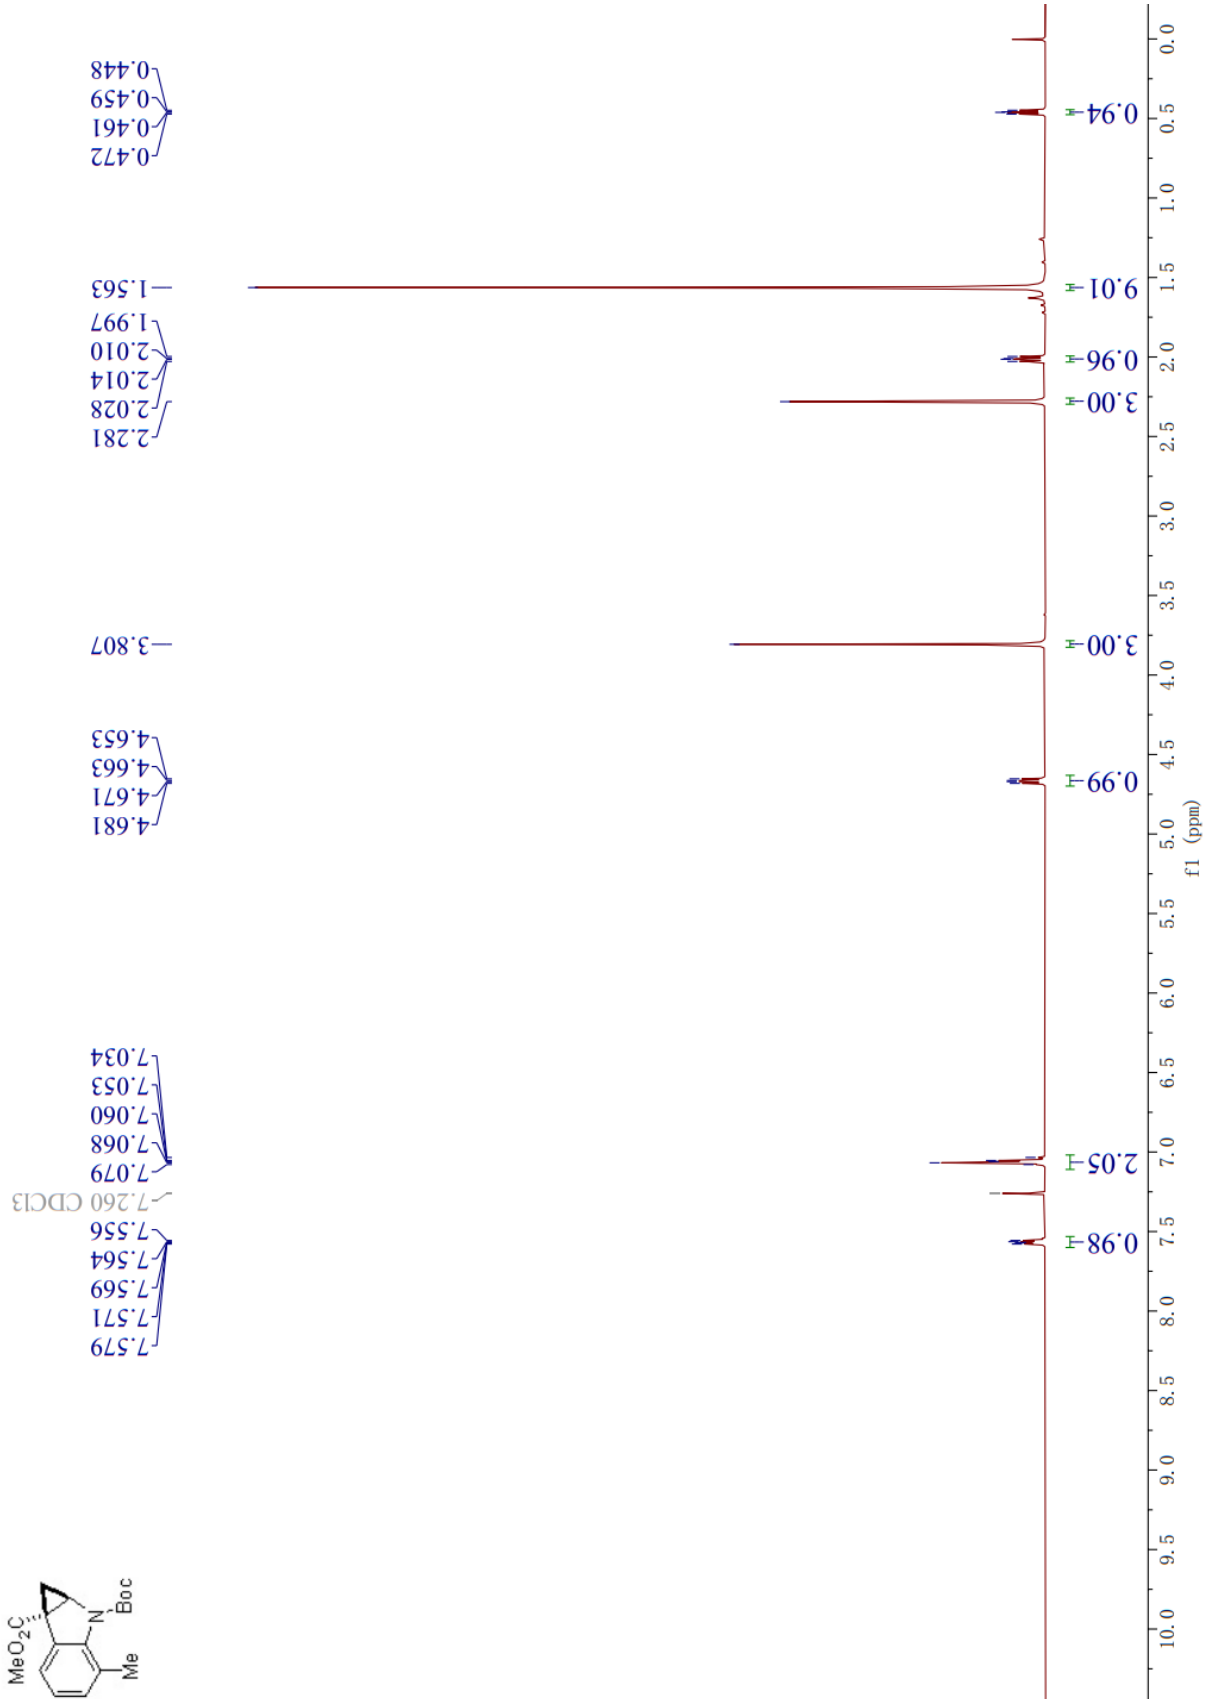

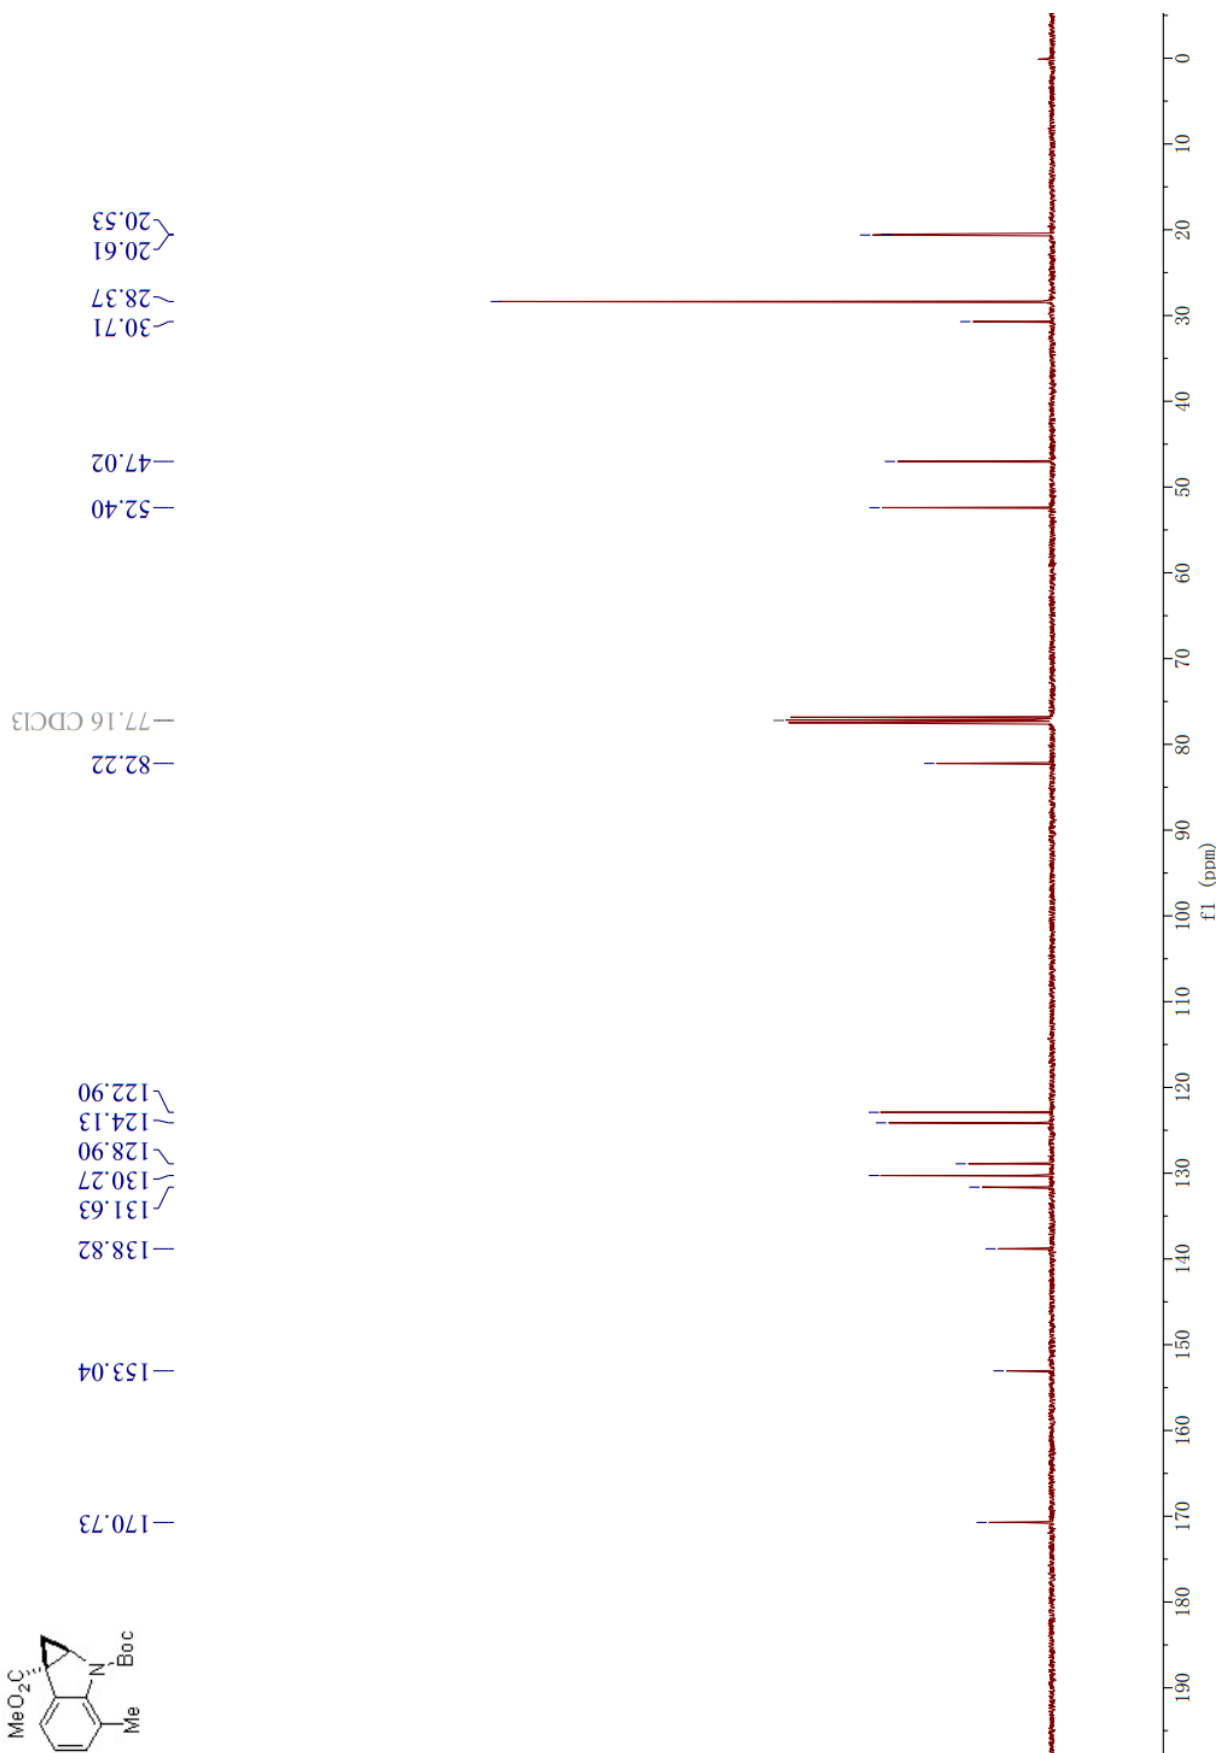

3g

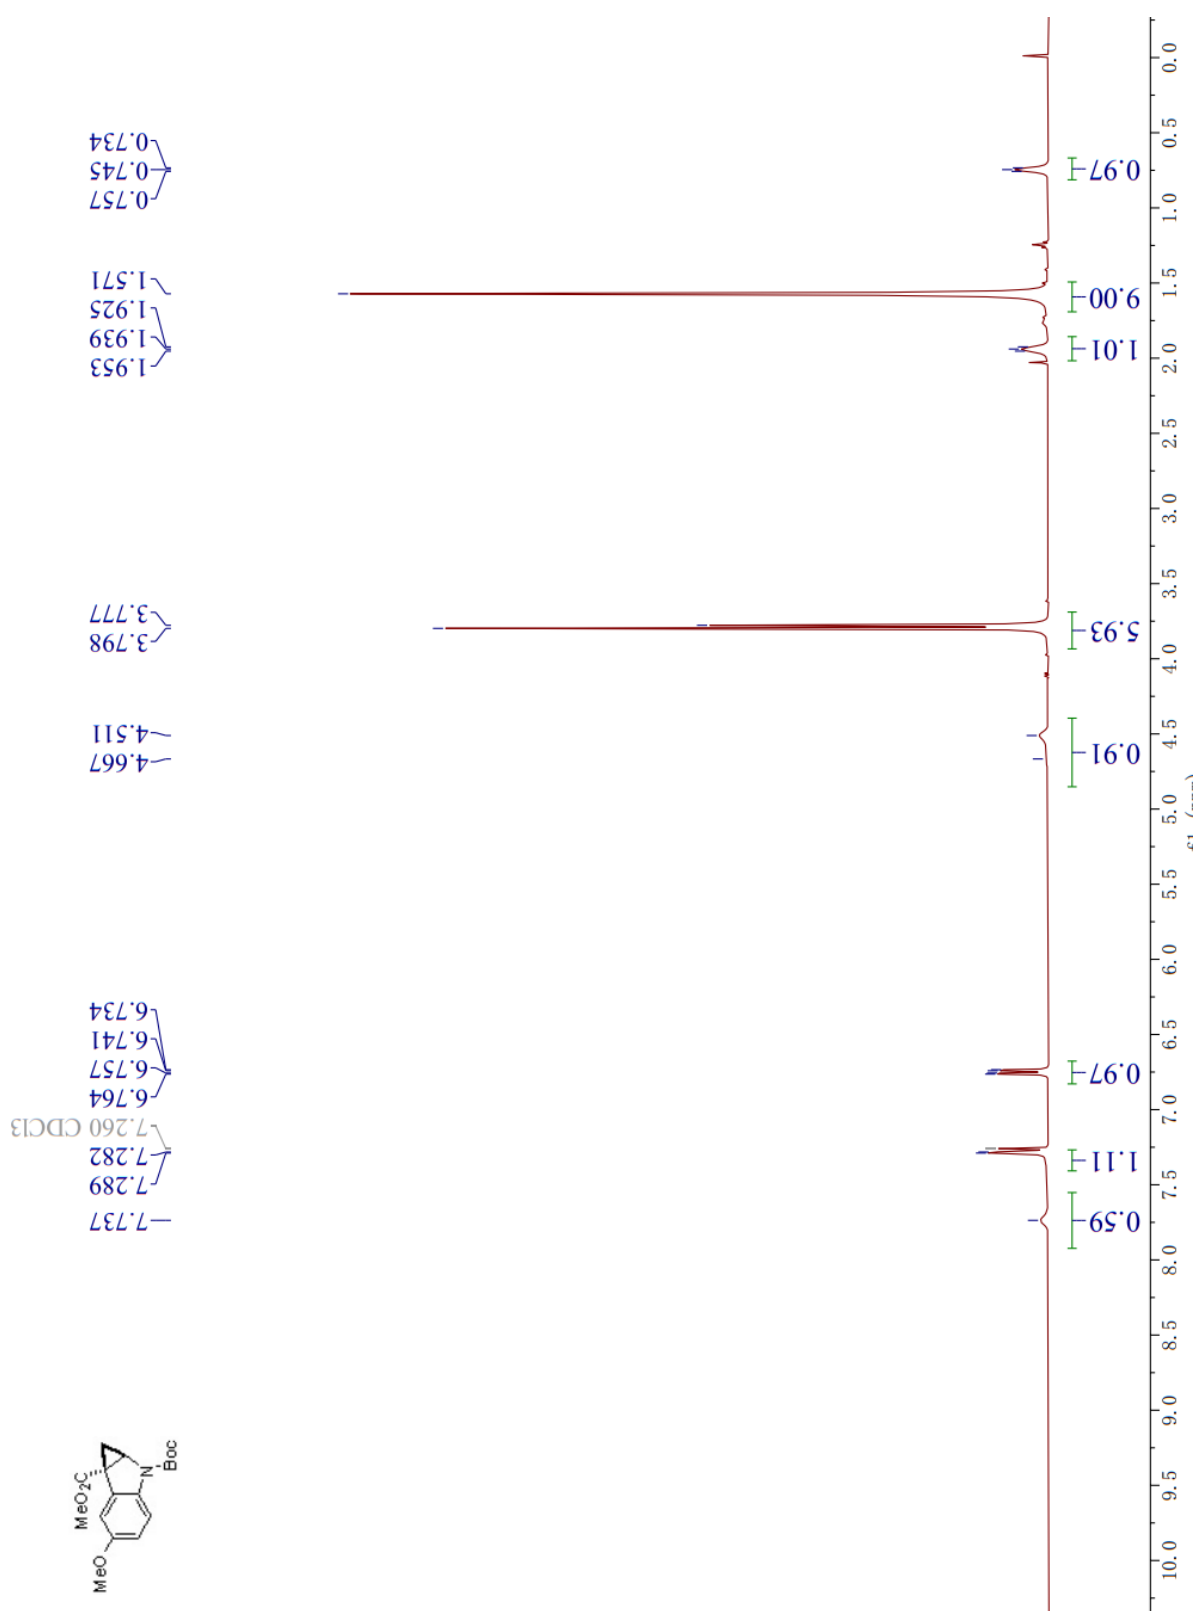

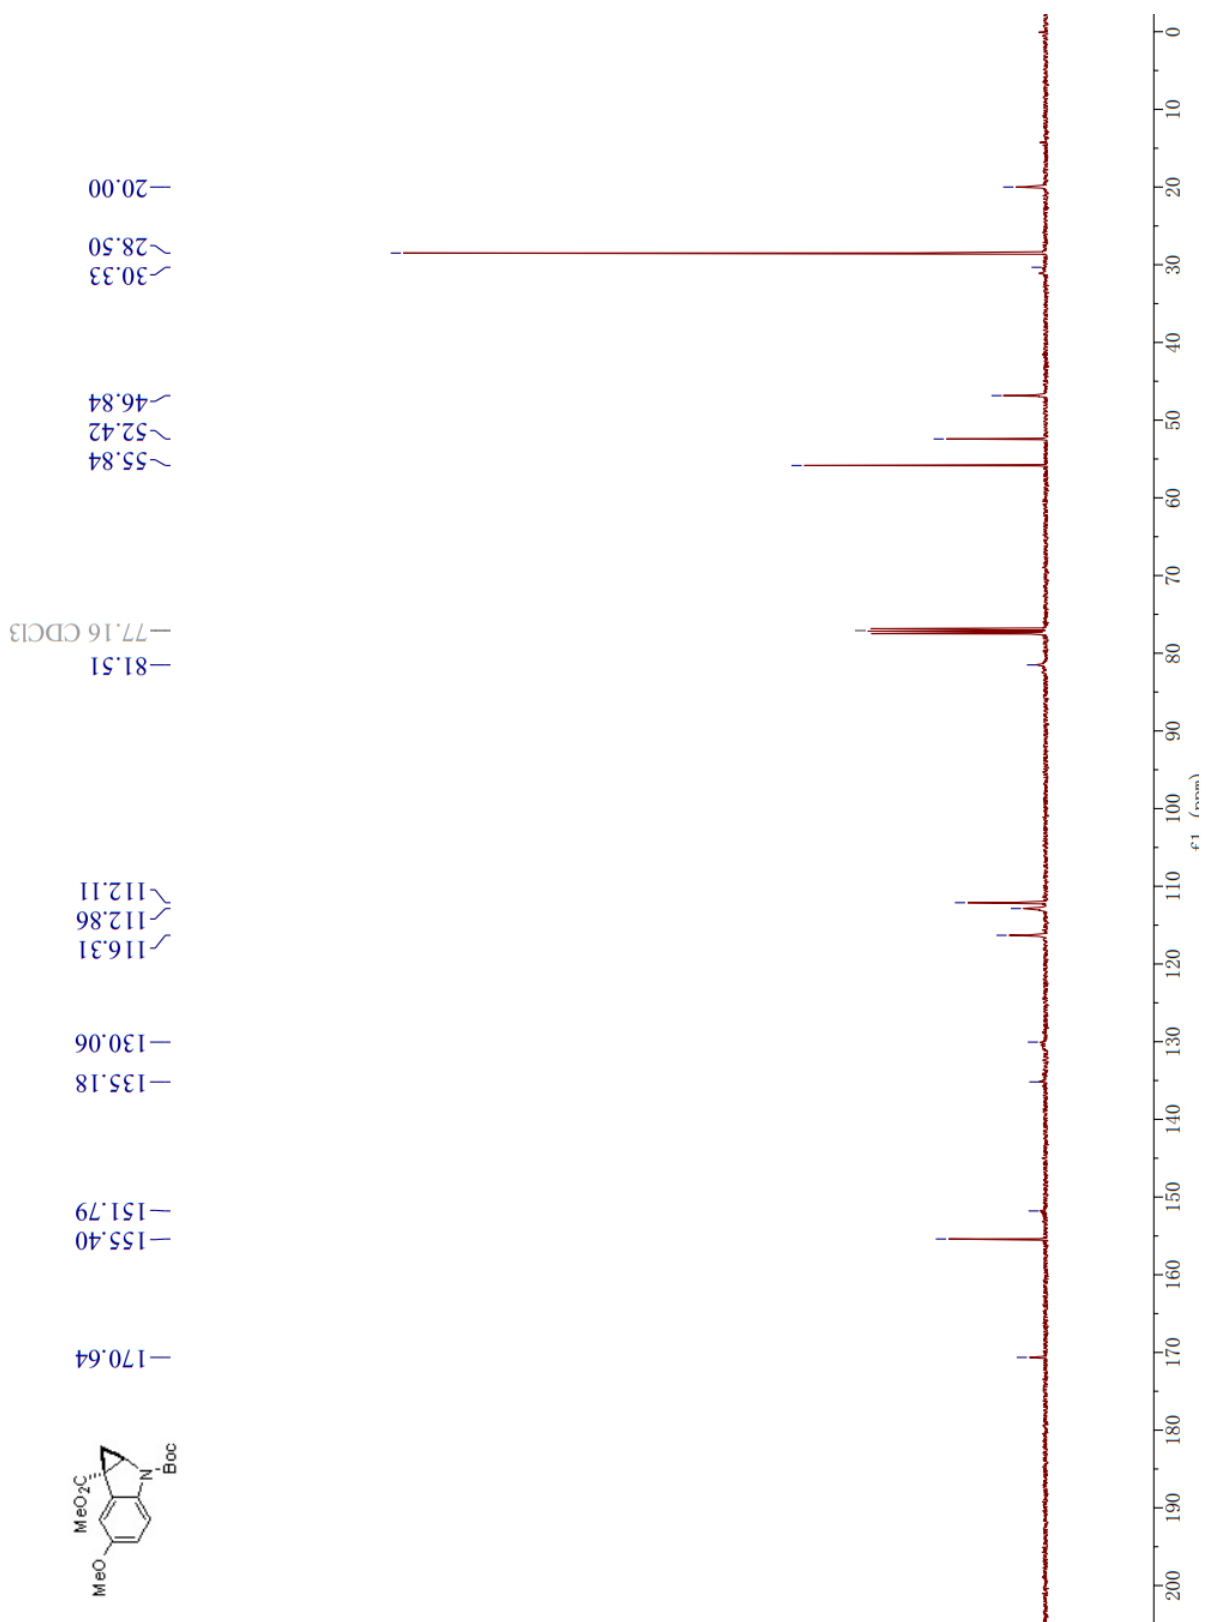



3h

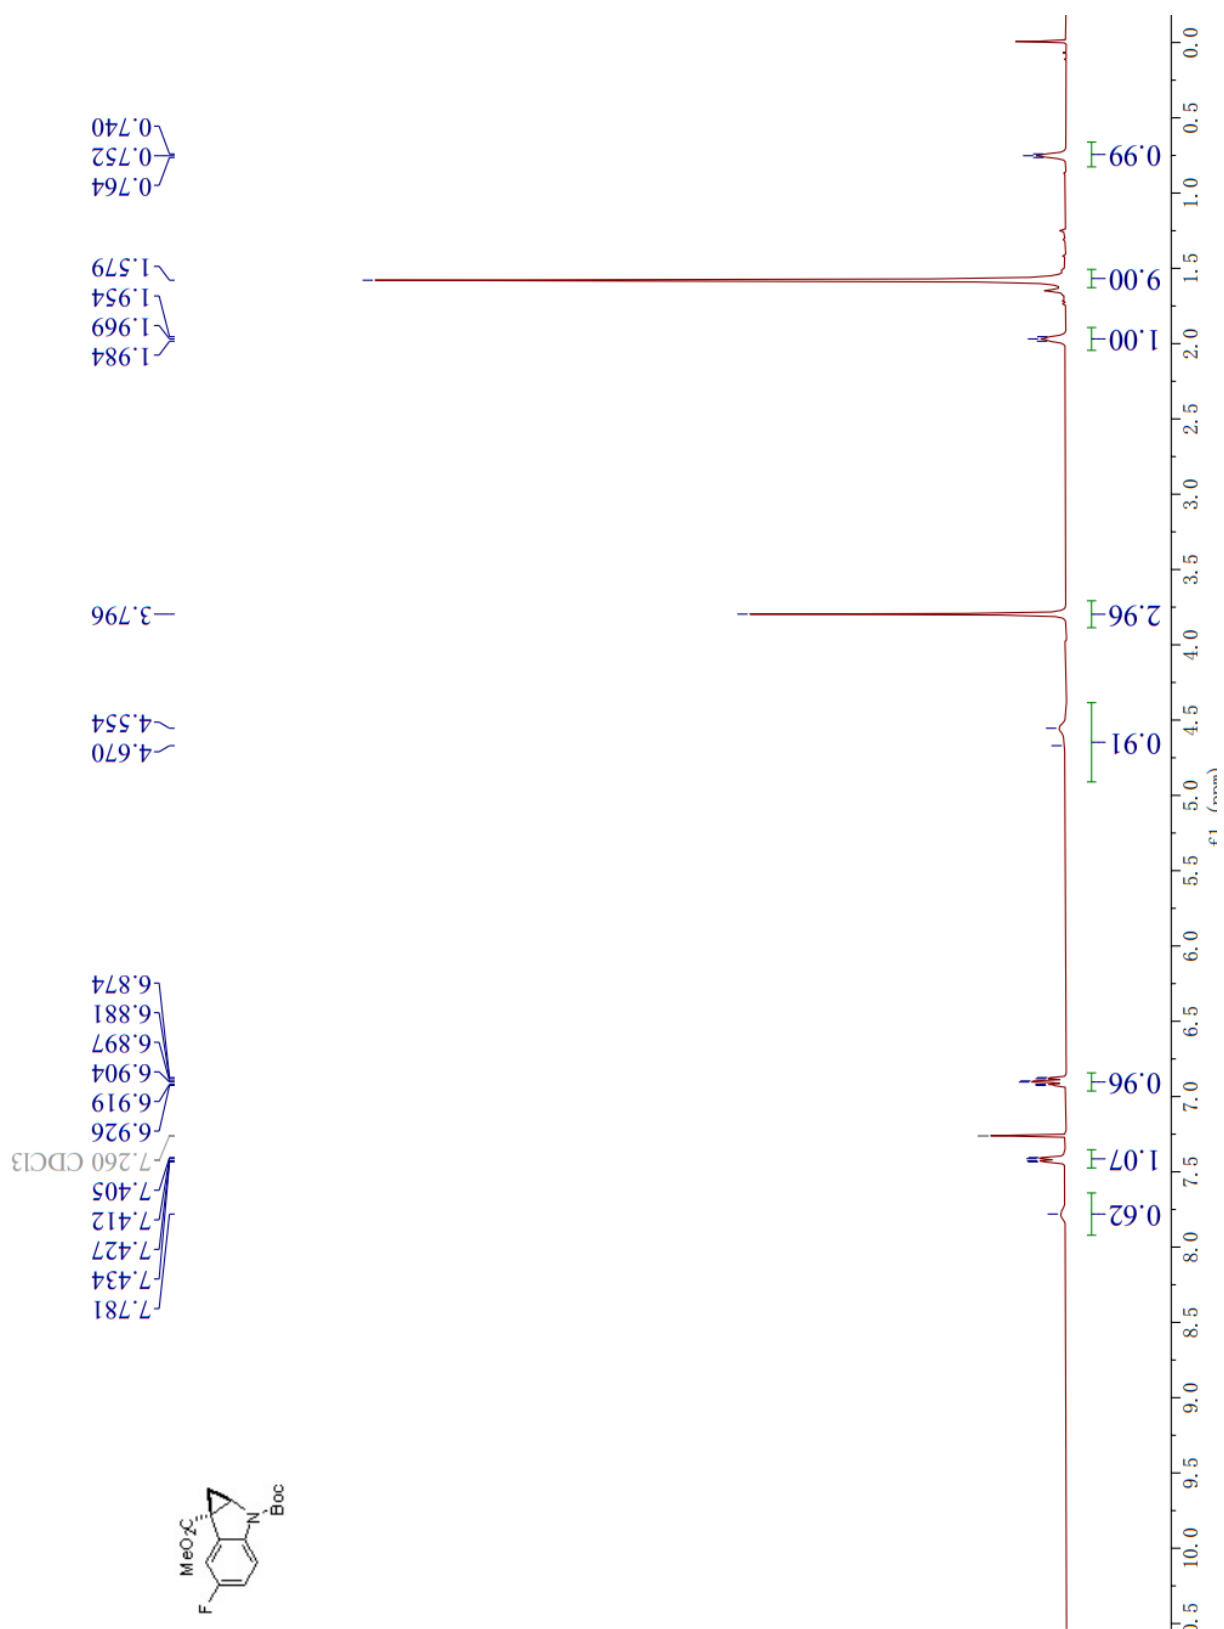

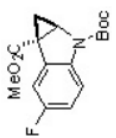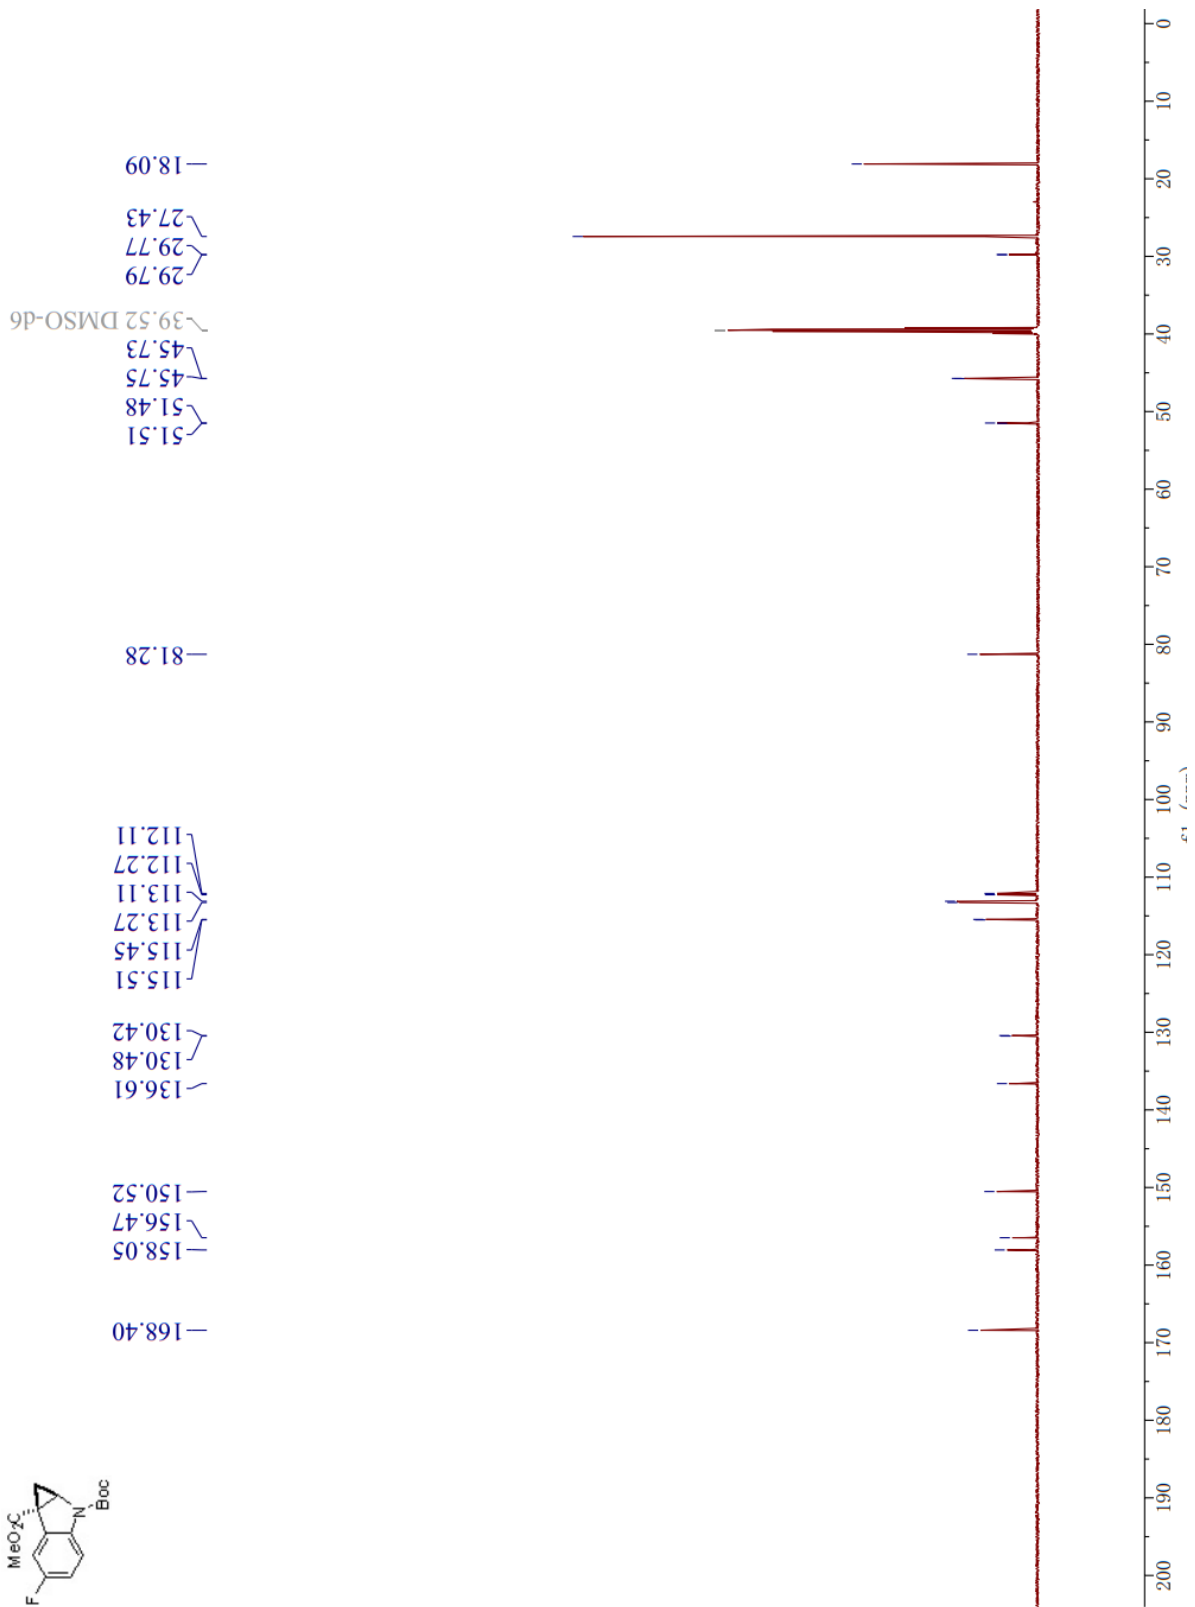

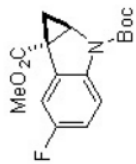

--120.992

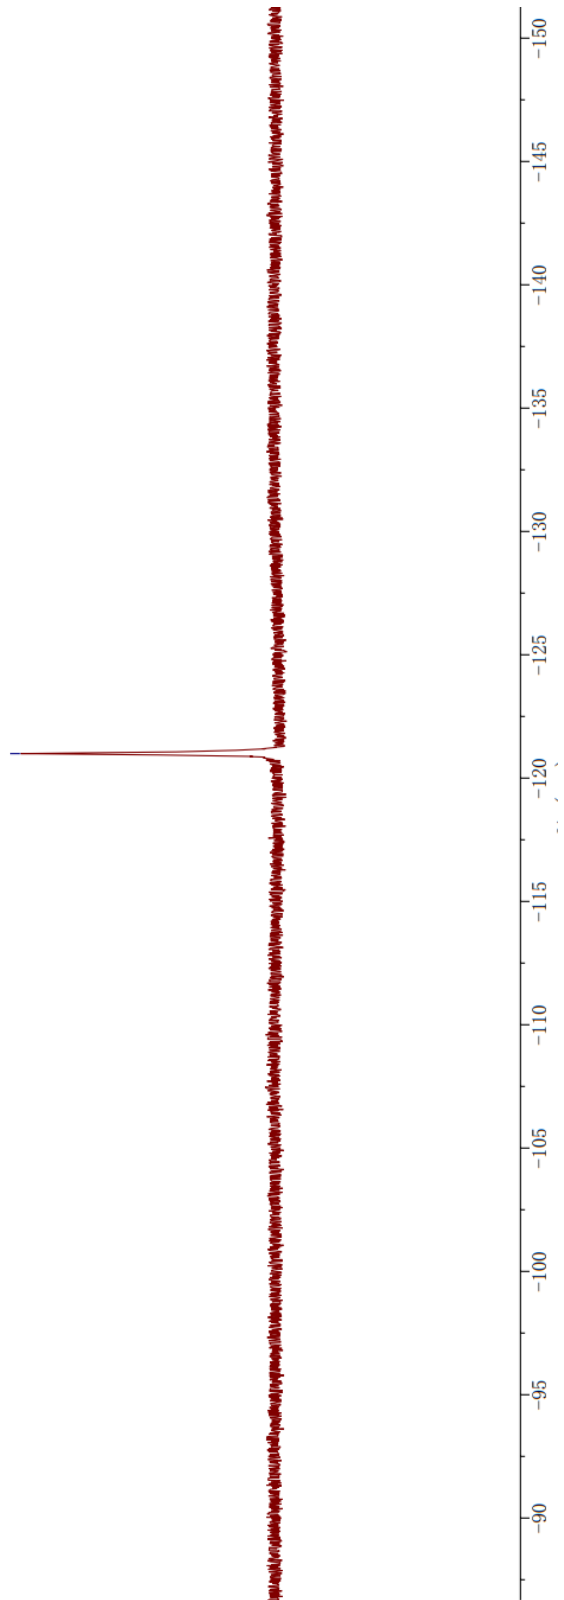

3i

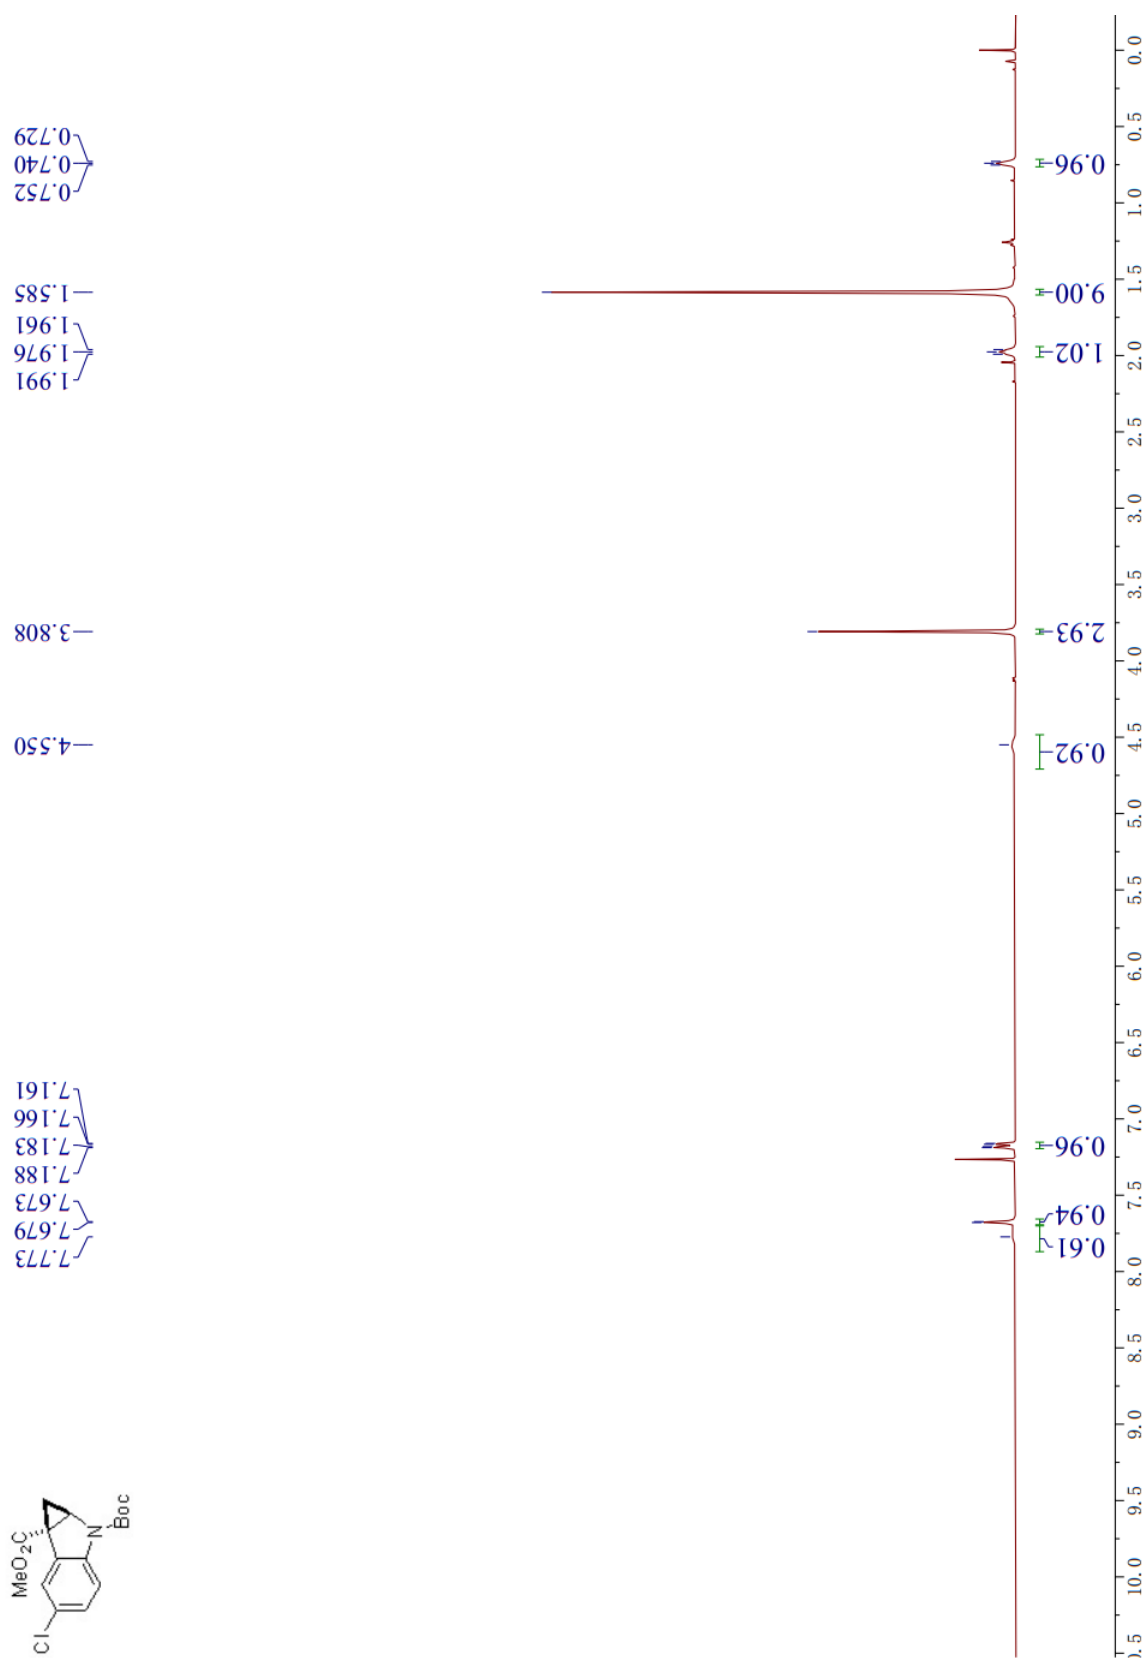

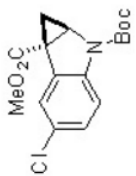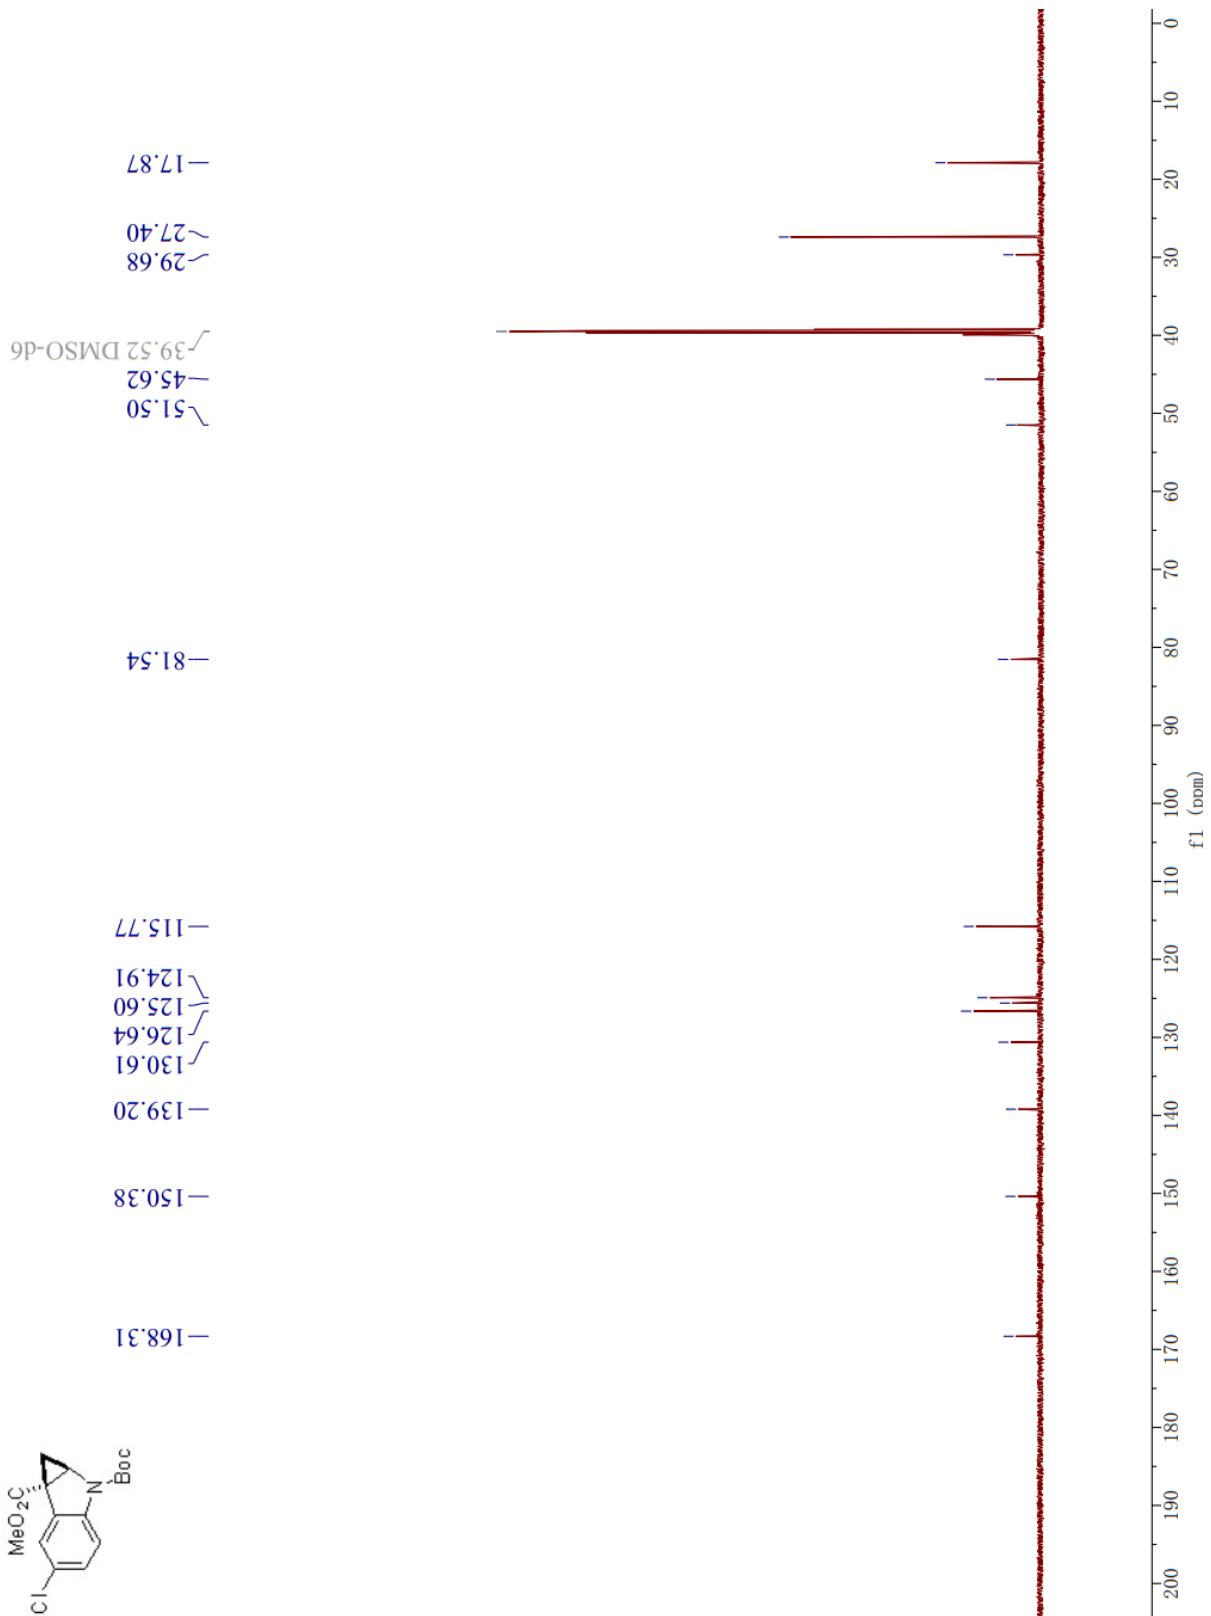

3j

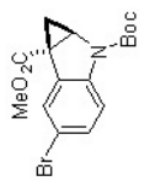

7.816  
7.811  
7.709  
7.325  
7.319  
7.303  
7.298  
7.260 CDCl<sub>3</sub>

—4.550

—3.799

1.980  
1.965  
1.950

1.577

0.736  
0.725  
0.714

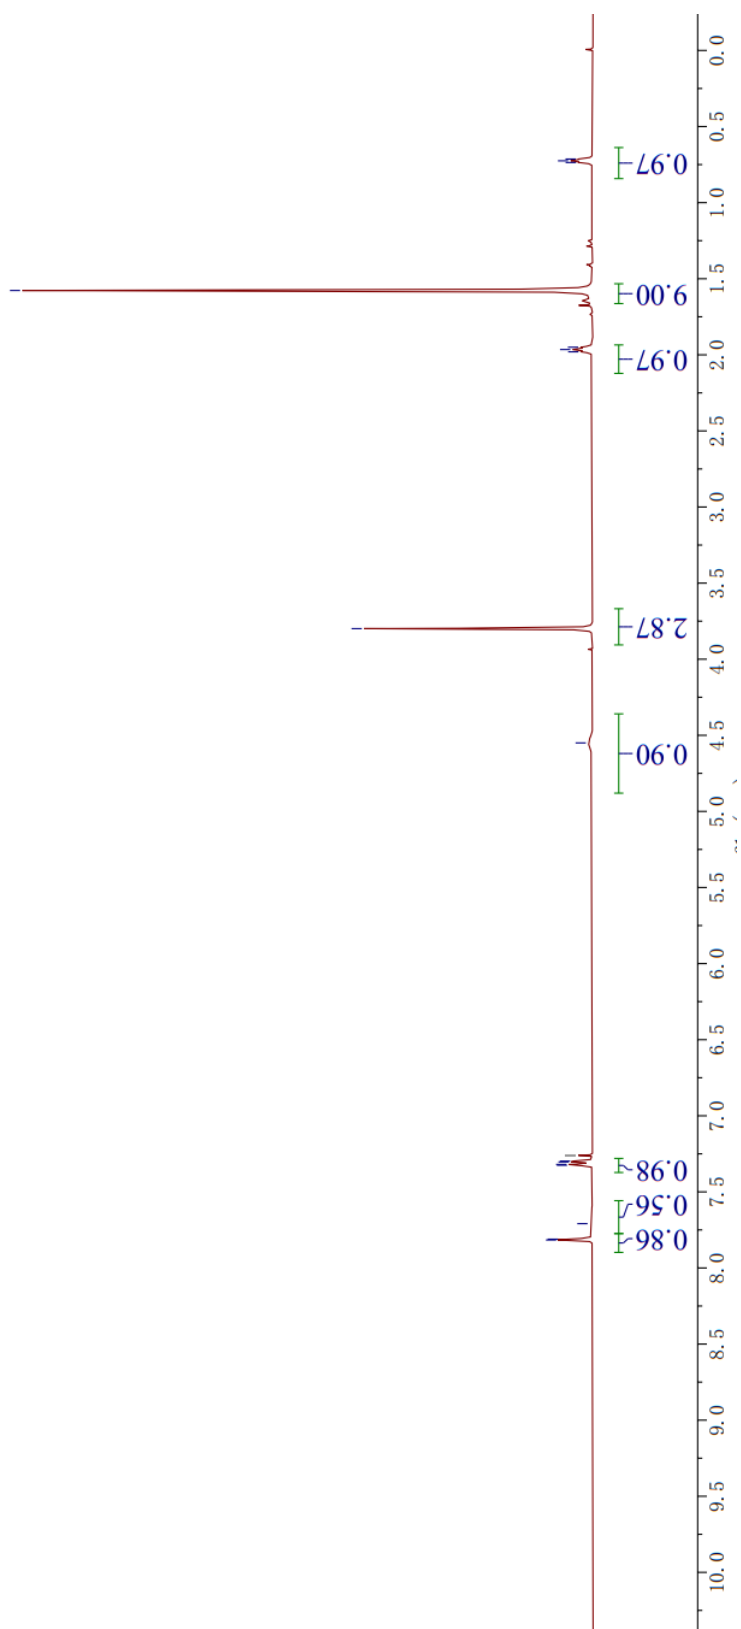

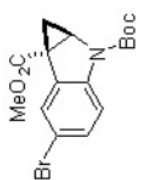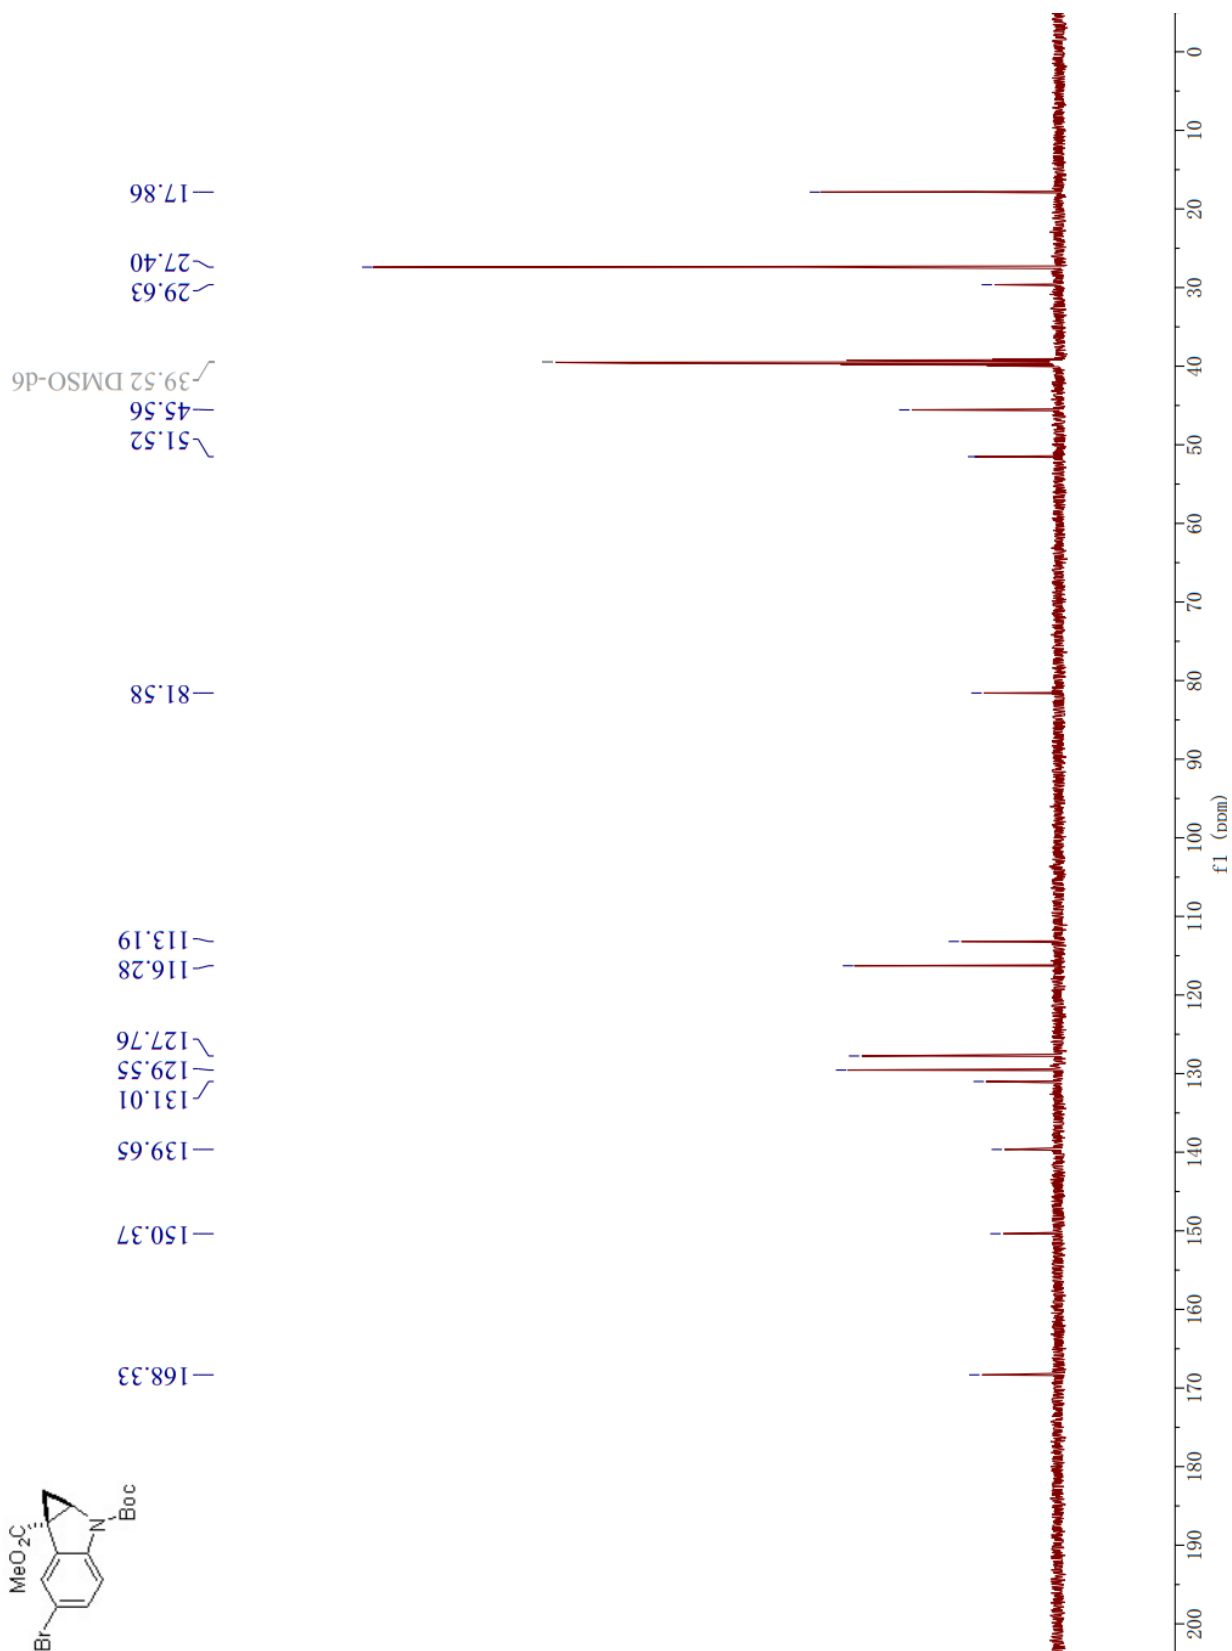

3k

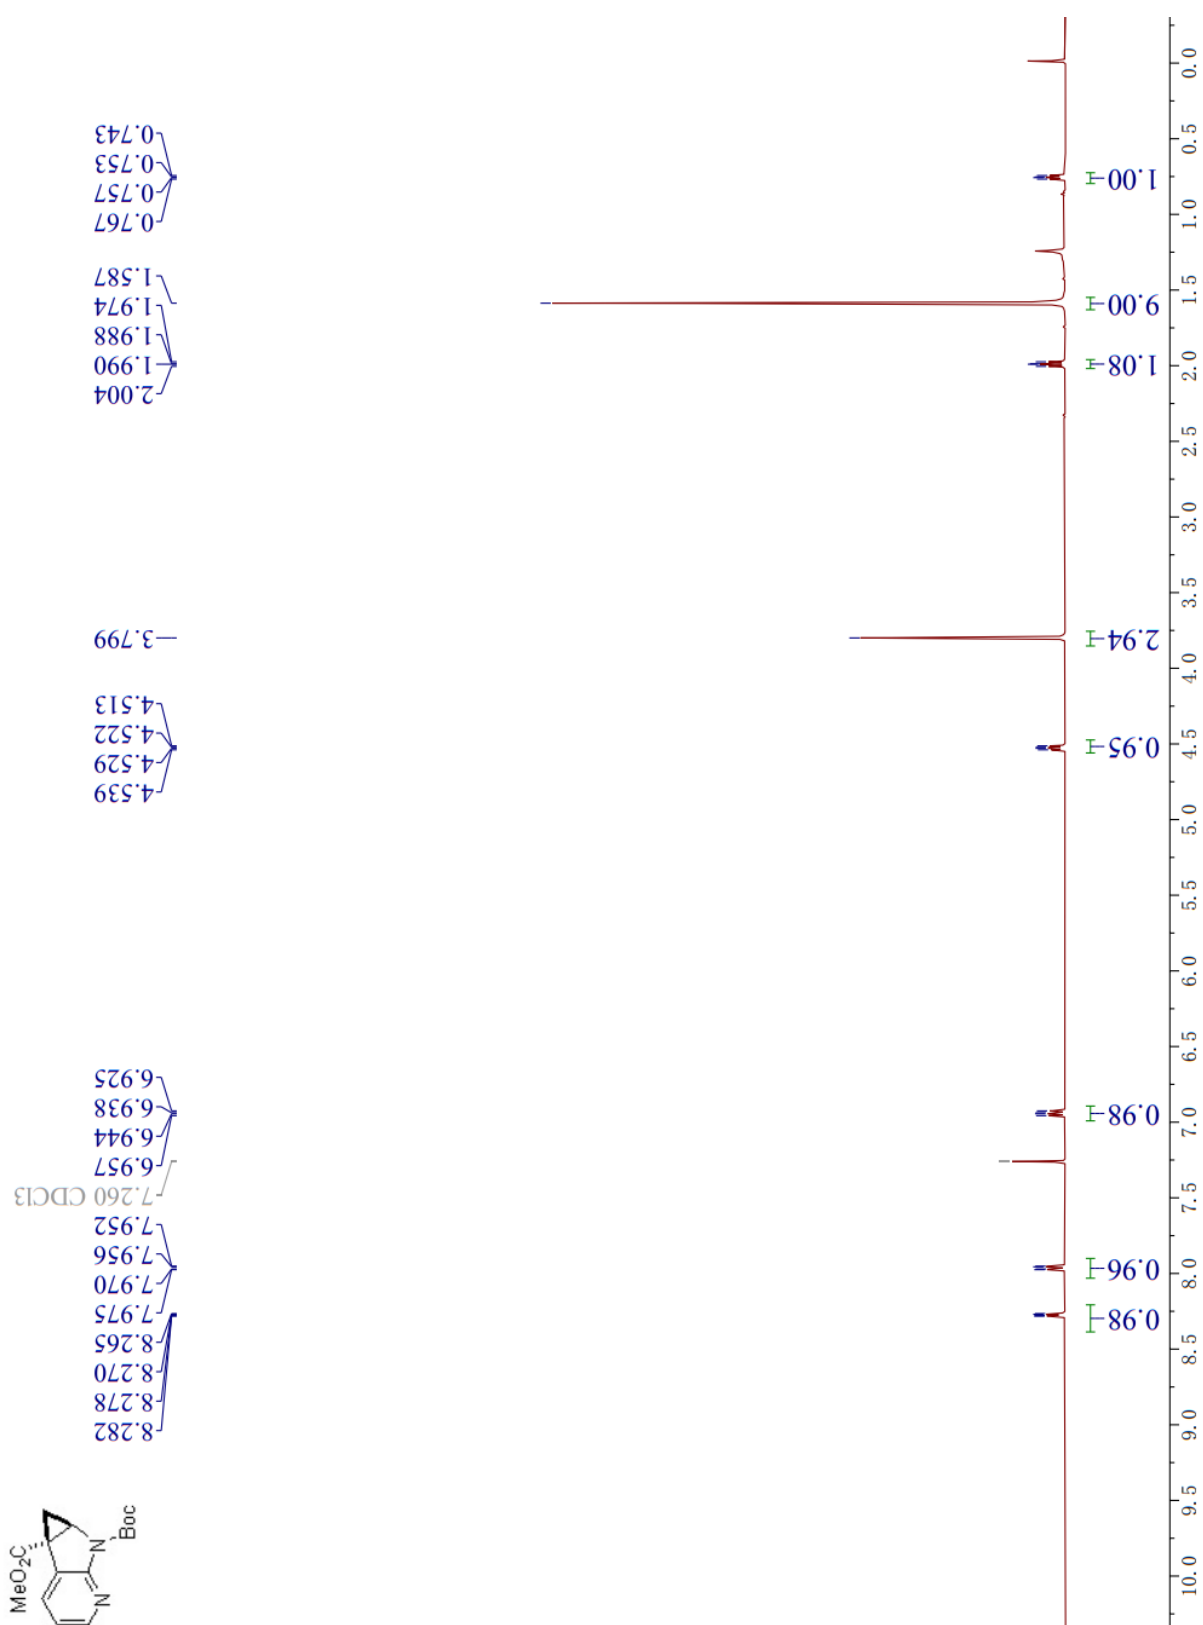



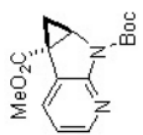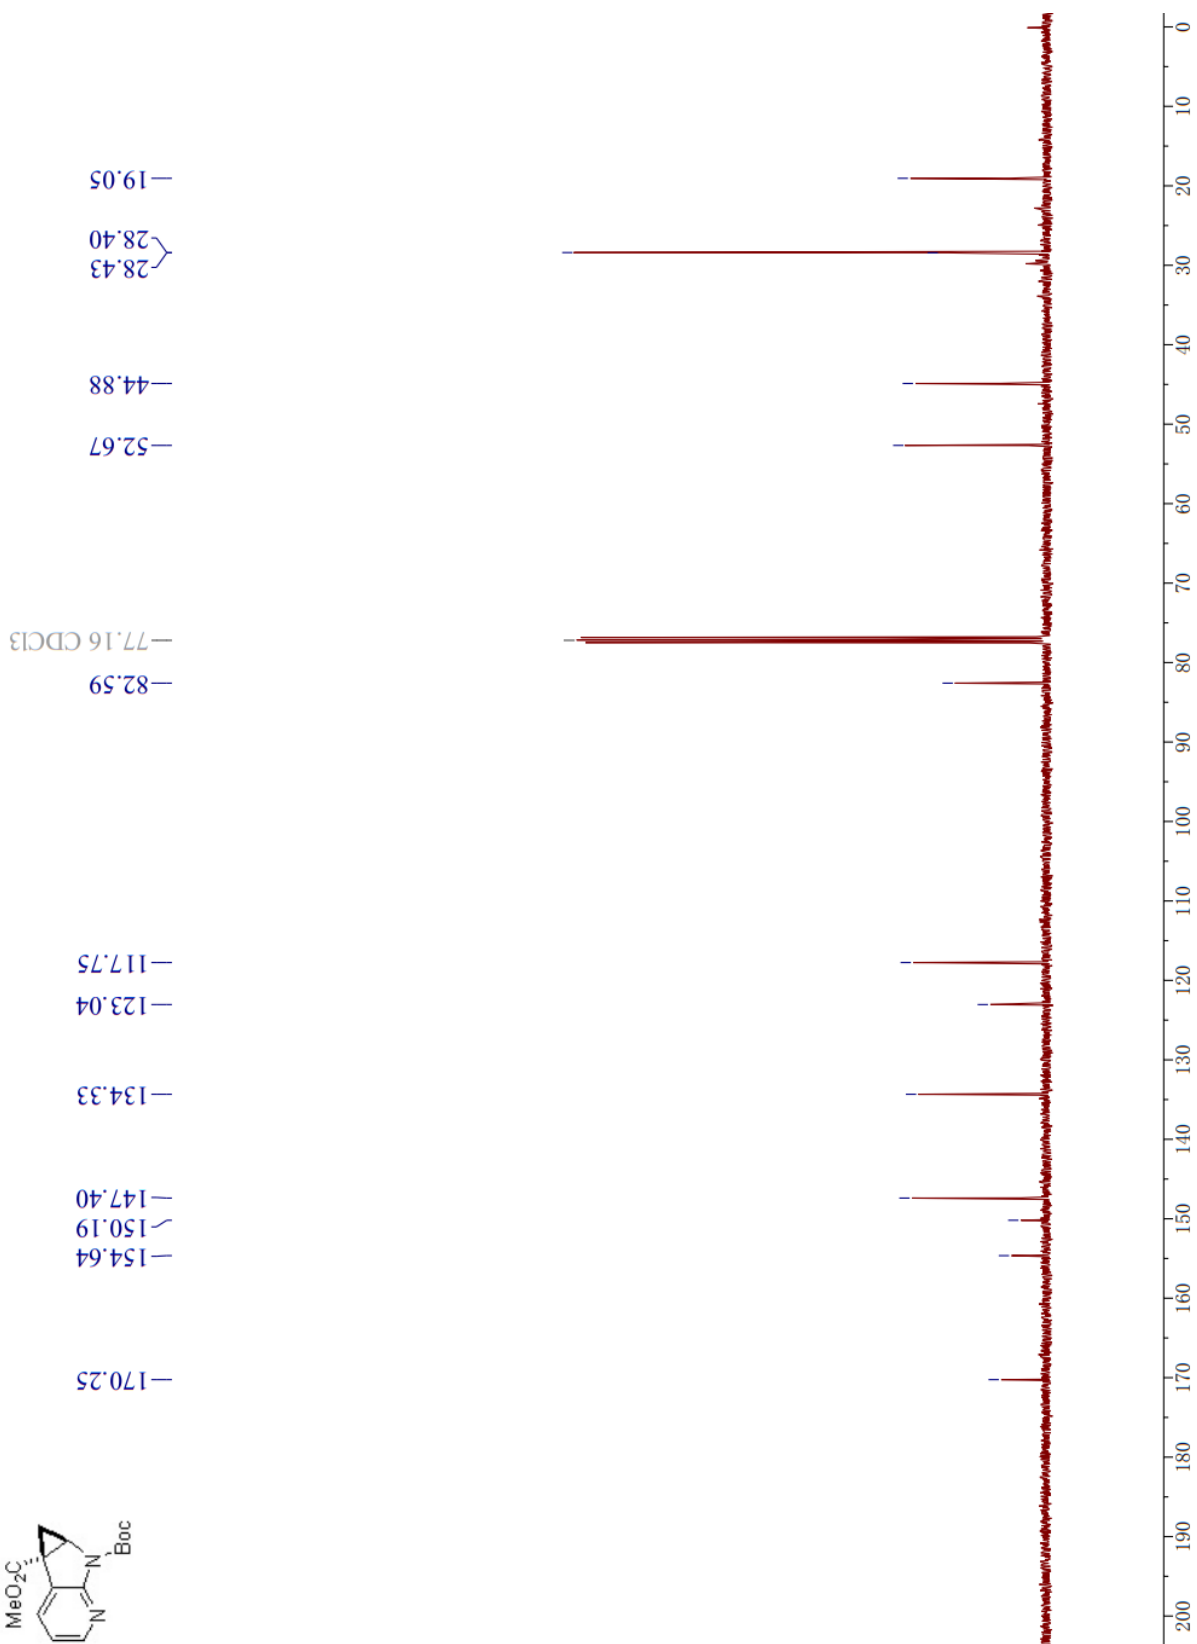

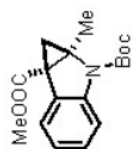

7.730  
7.710  
7.482  
7.463  
7.260 CDCl<sub>3</sub>  
7.203  
7.184  
7.165  
7.021  
7.003  
6.984

— 3.809

2.030  
2.017  
1.778  
1.589  
0.992  
0.978

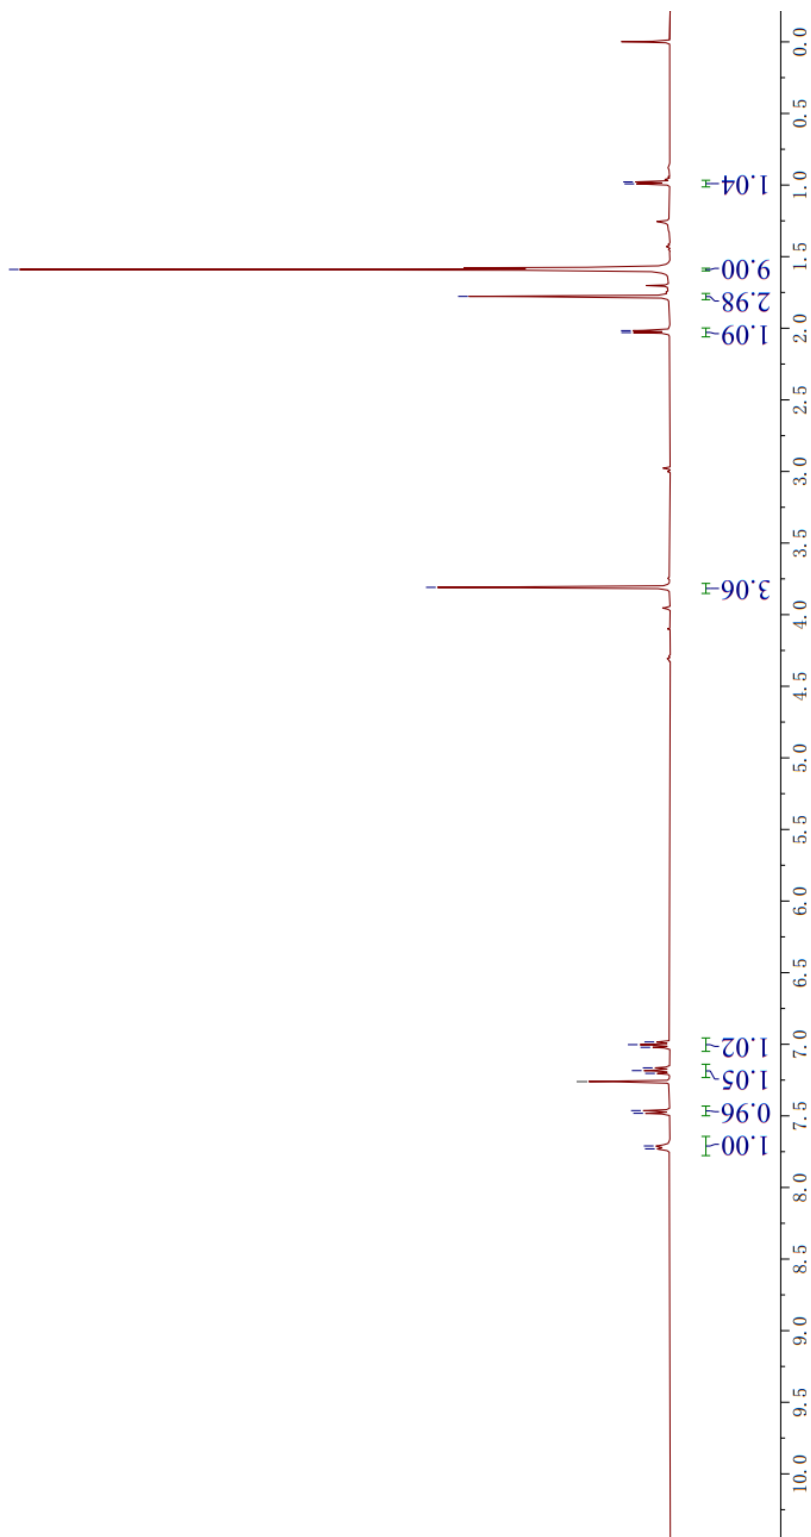

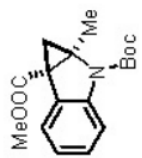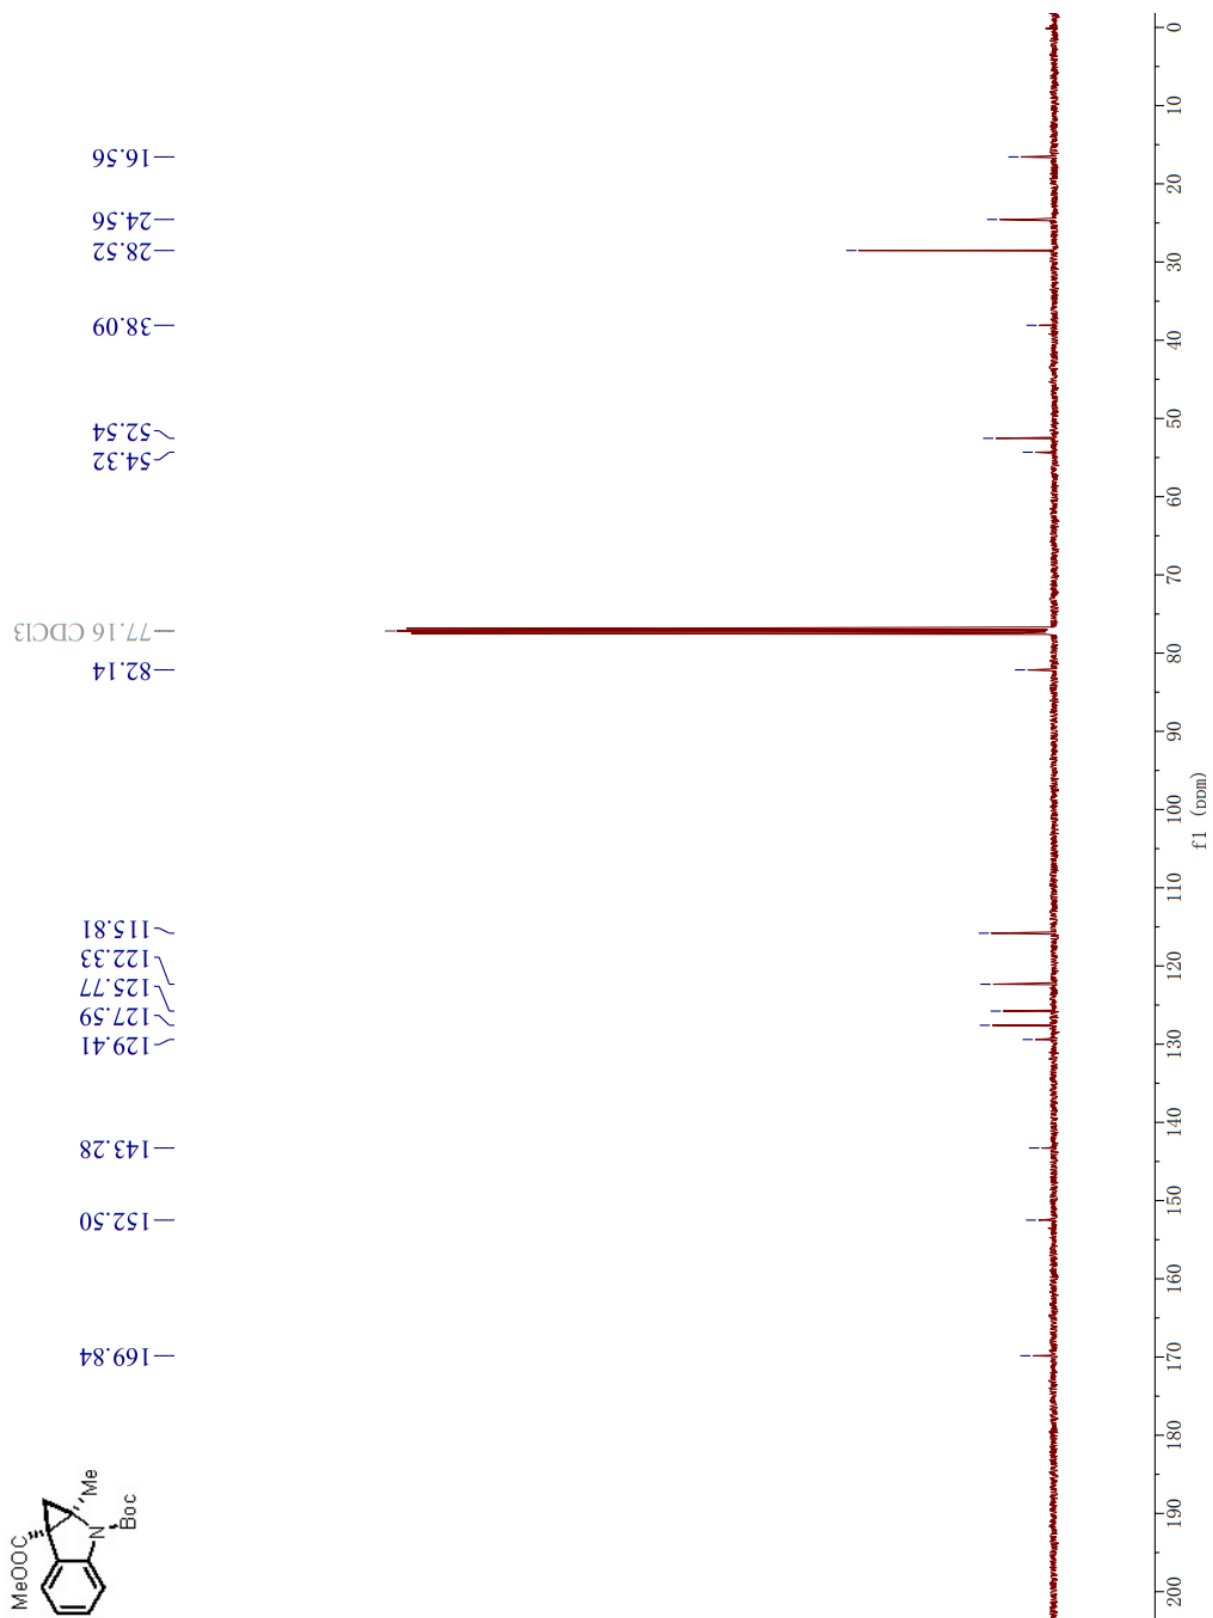

3m

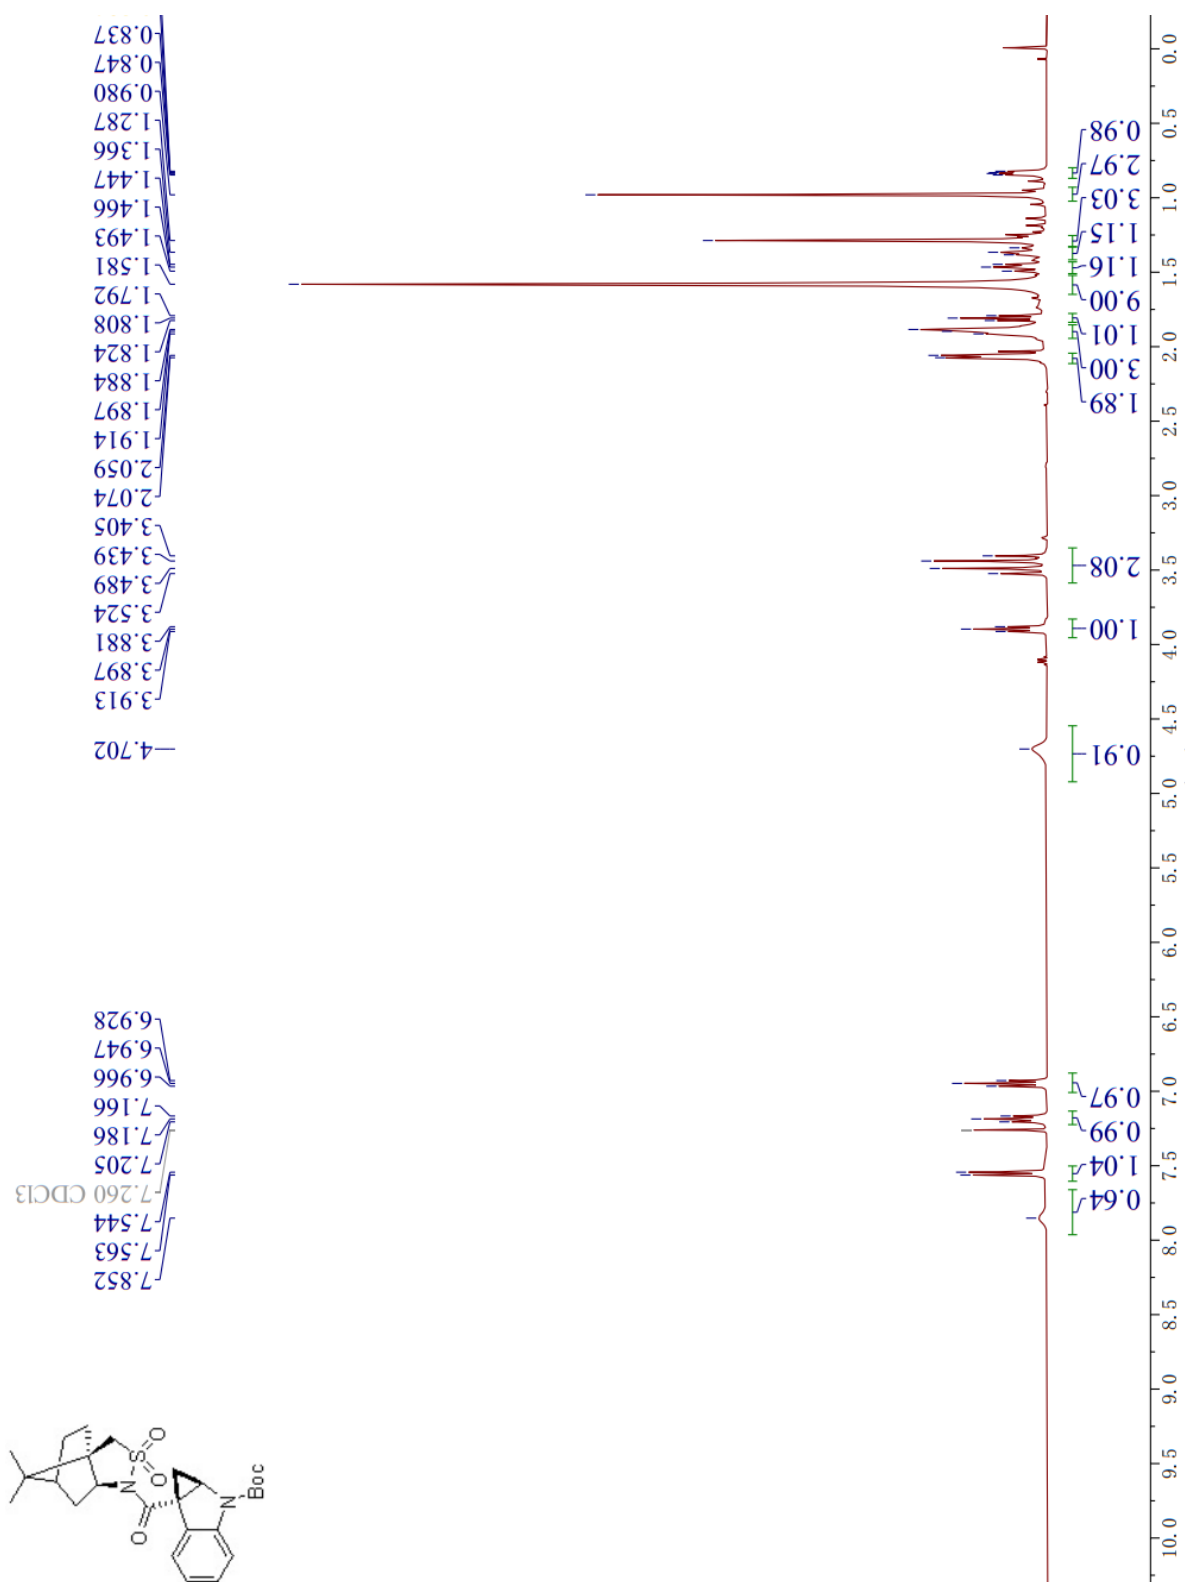

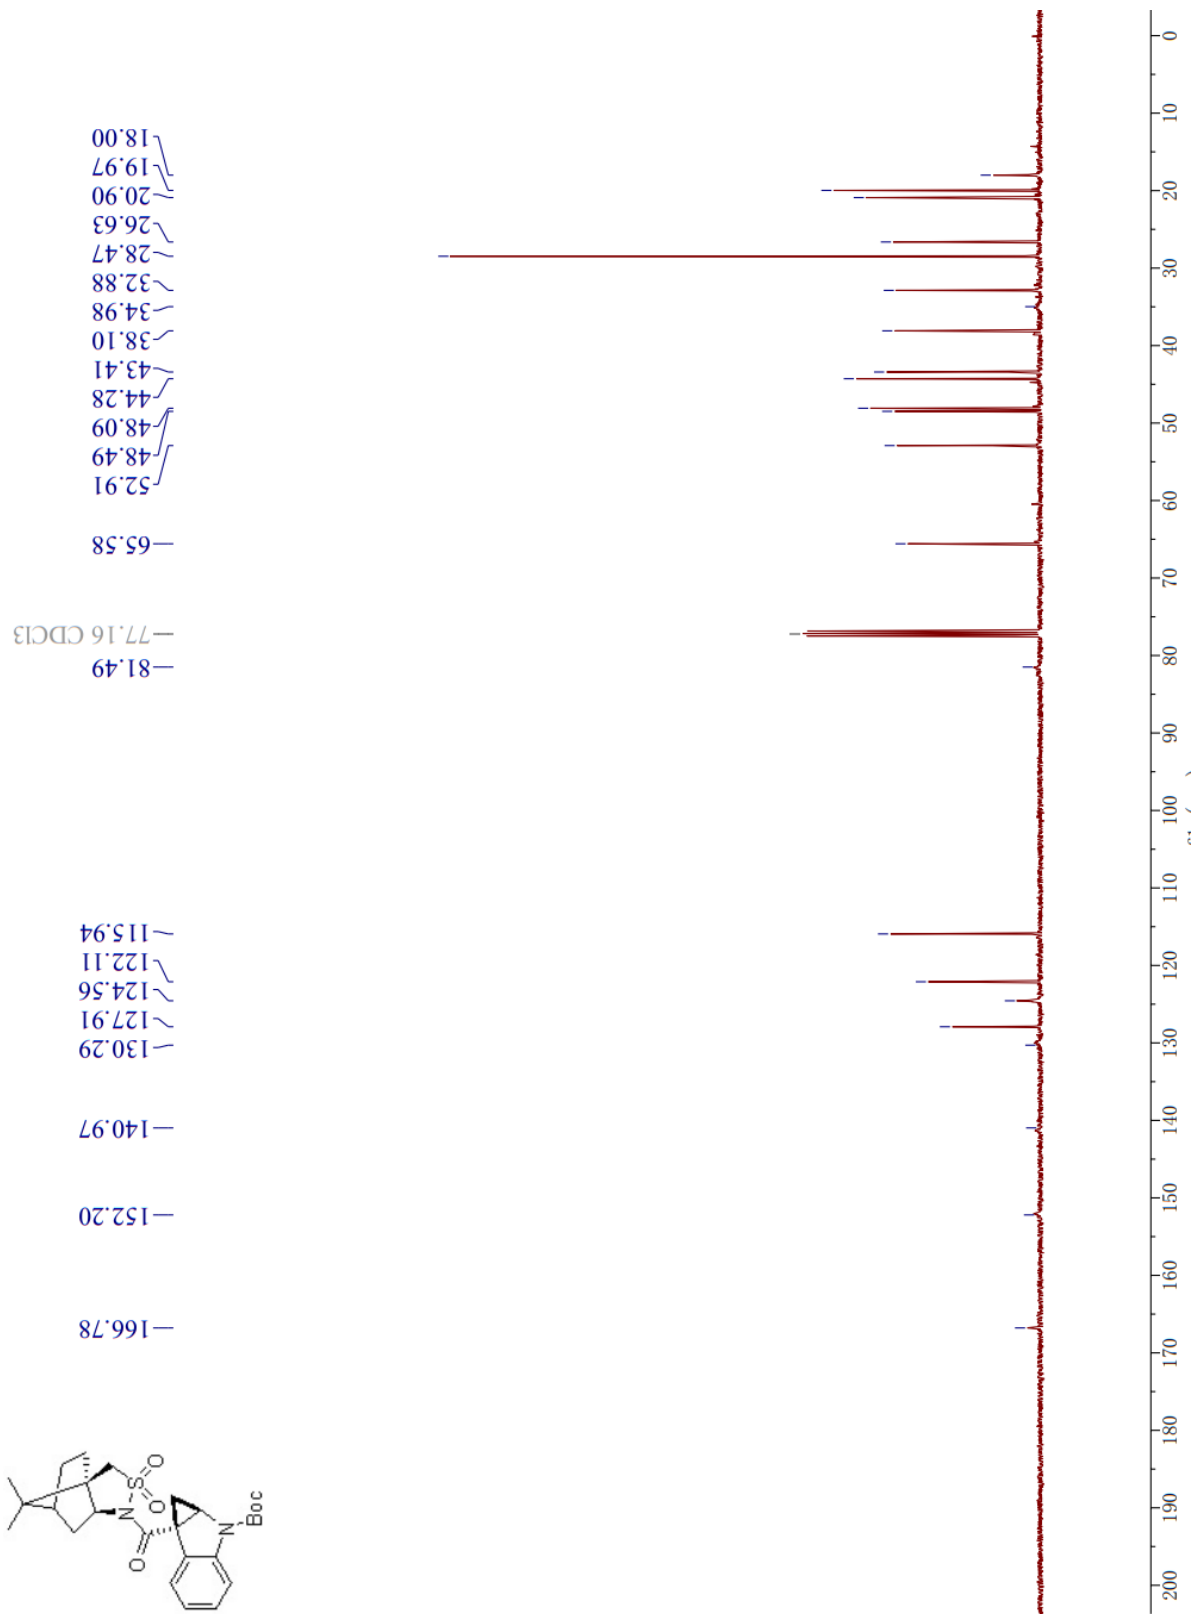

5a

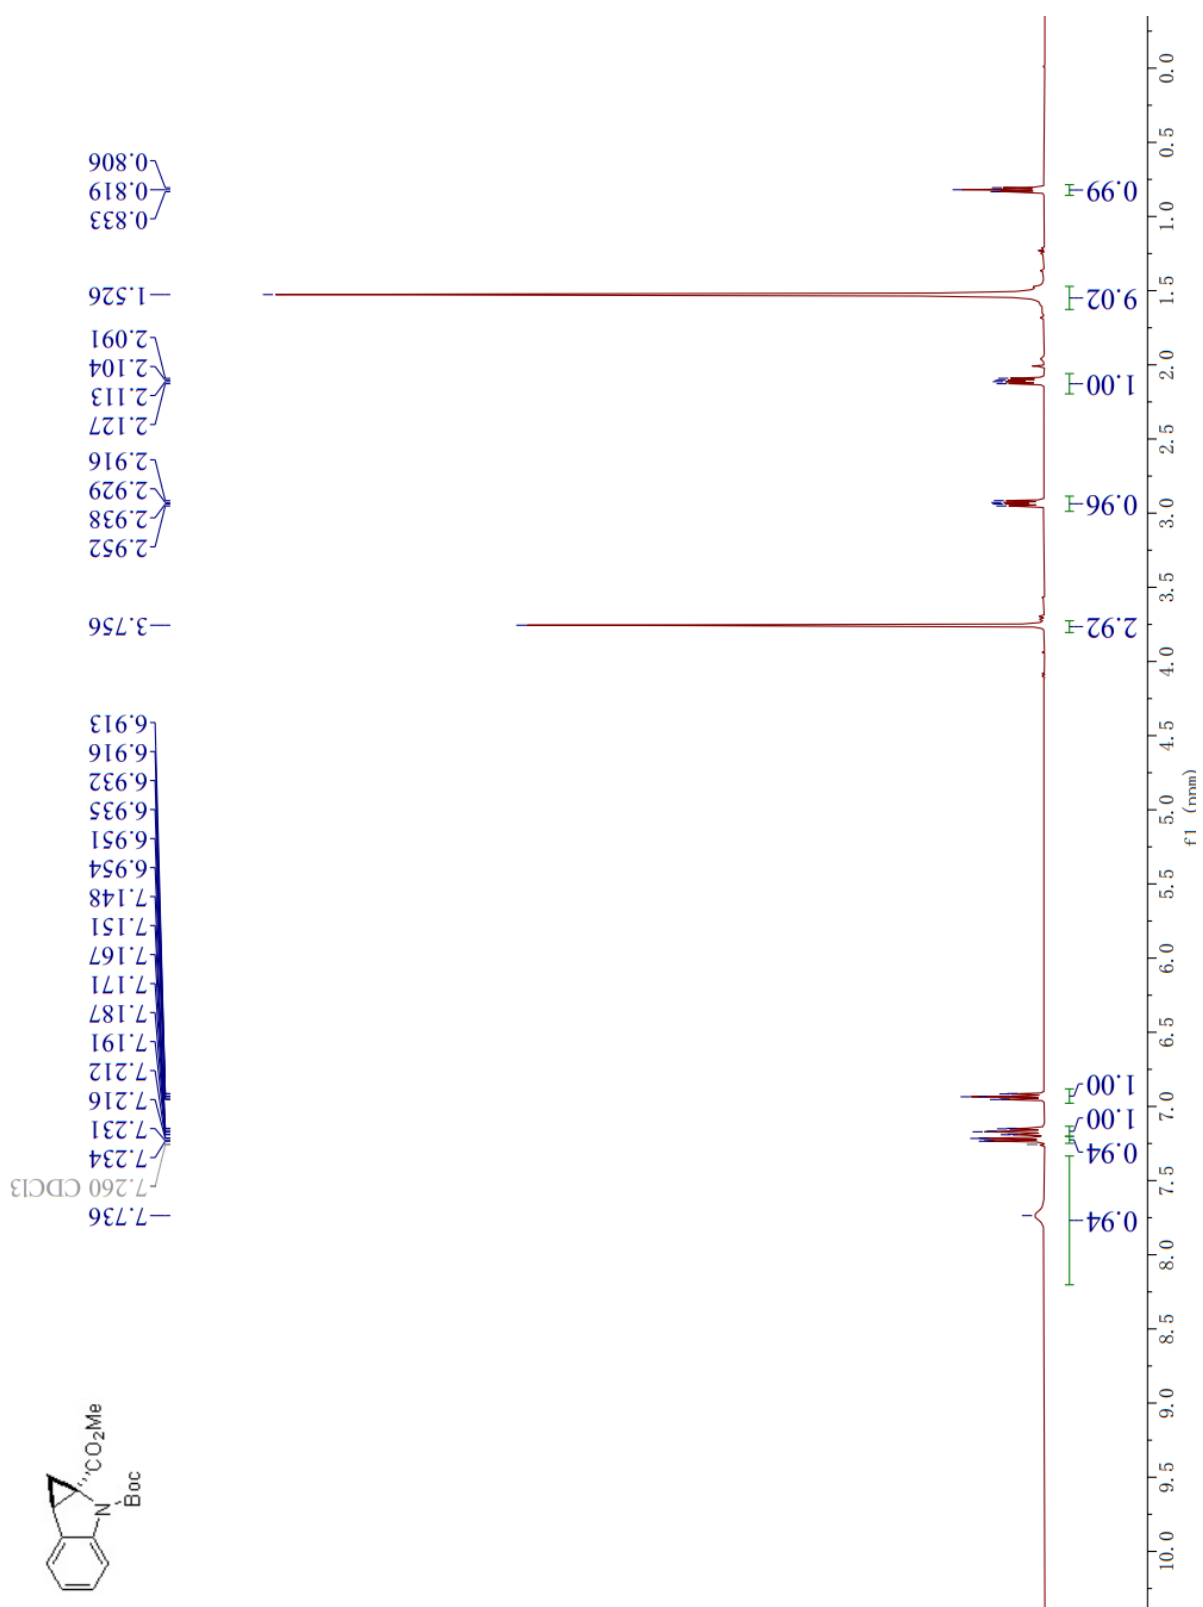

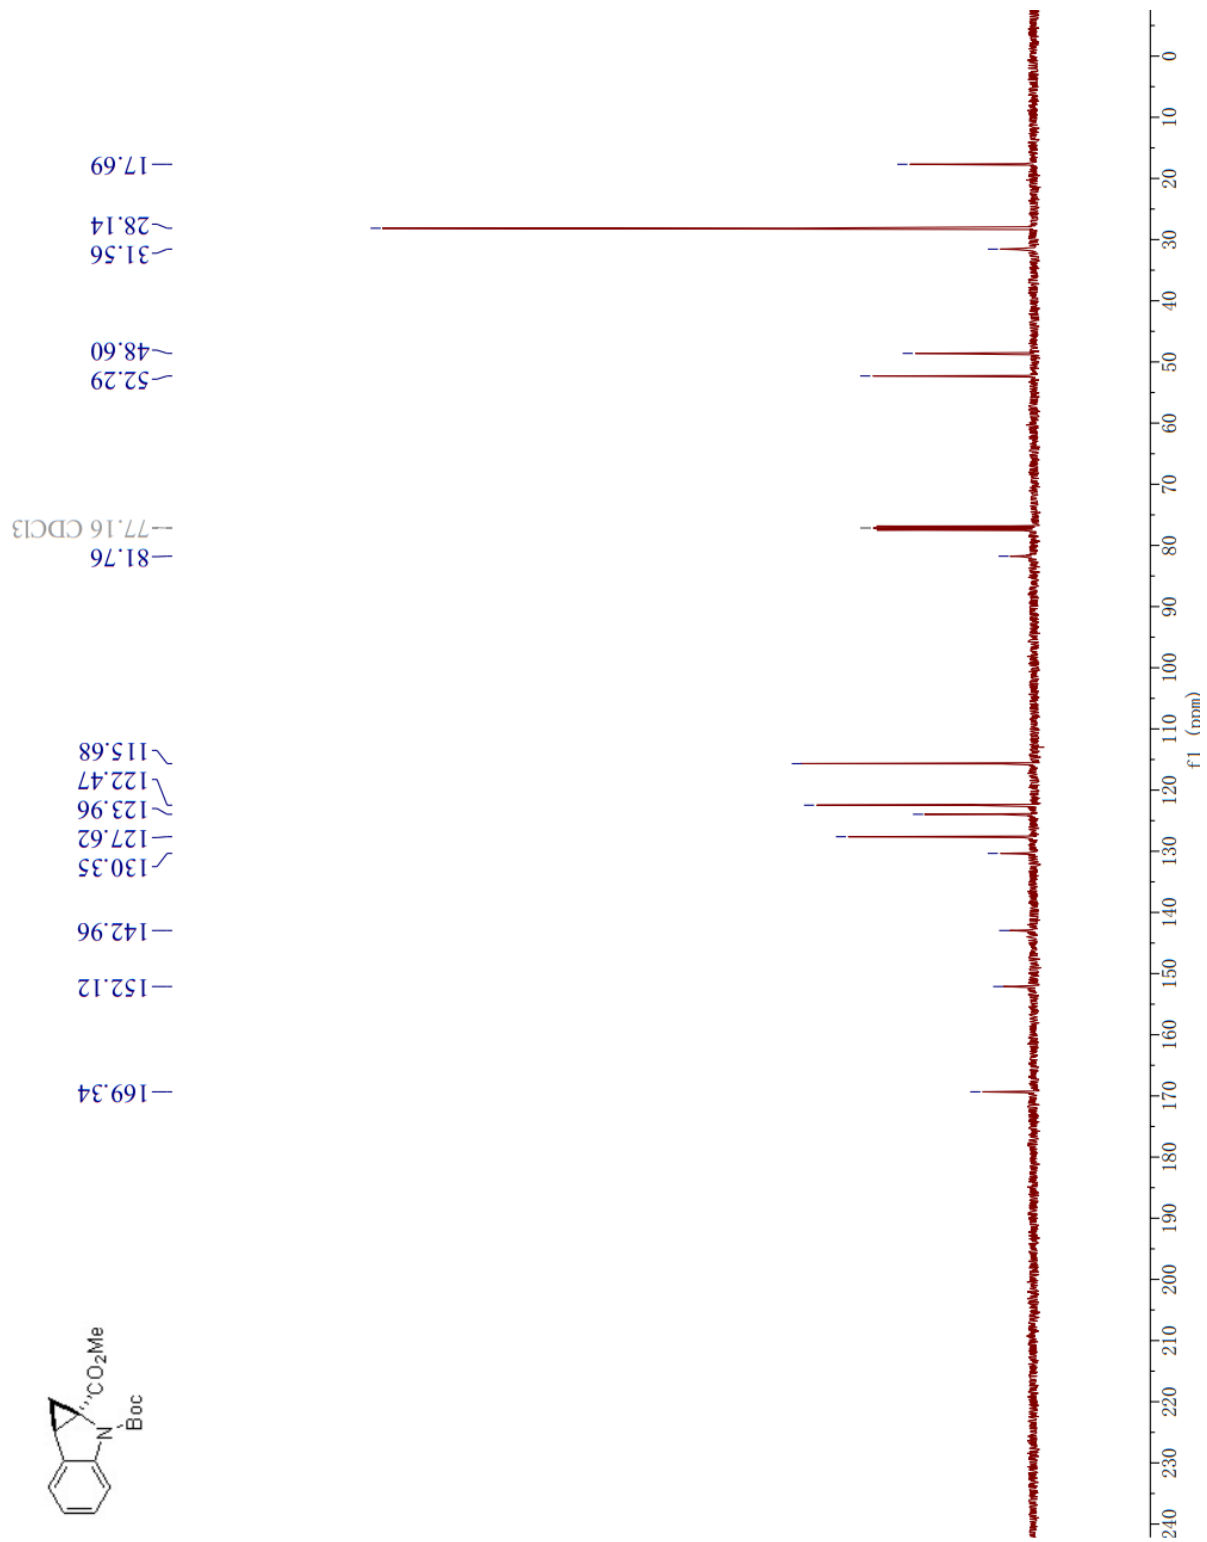

5b

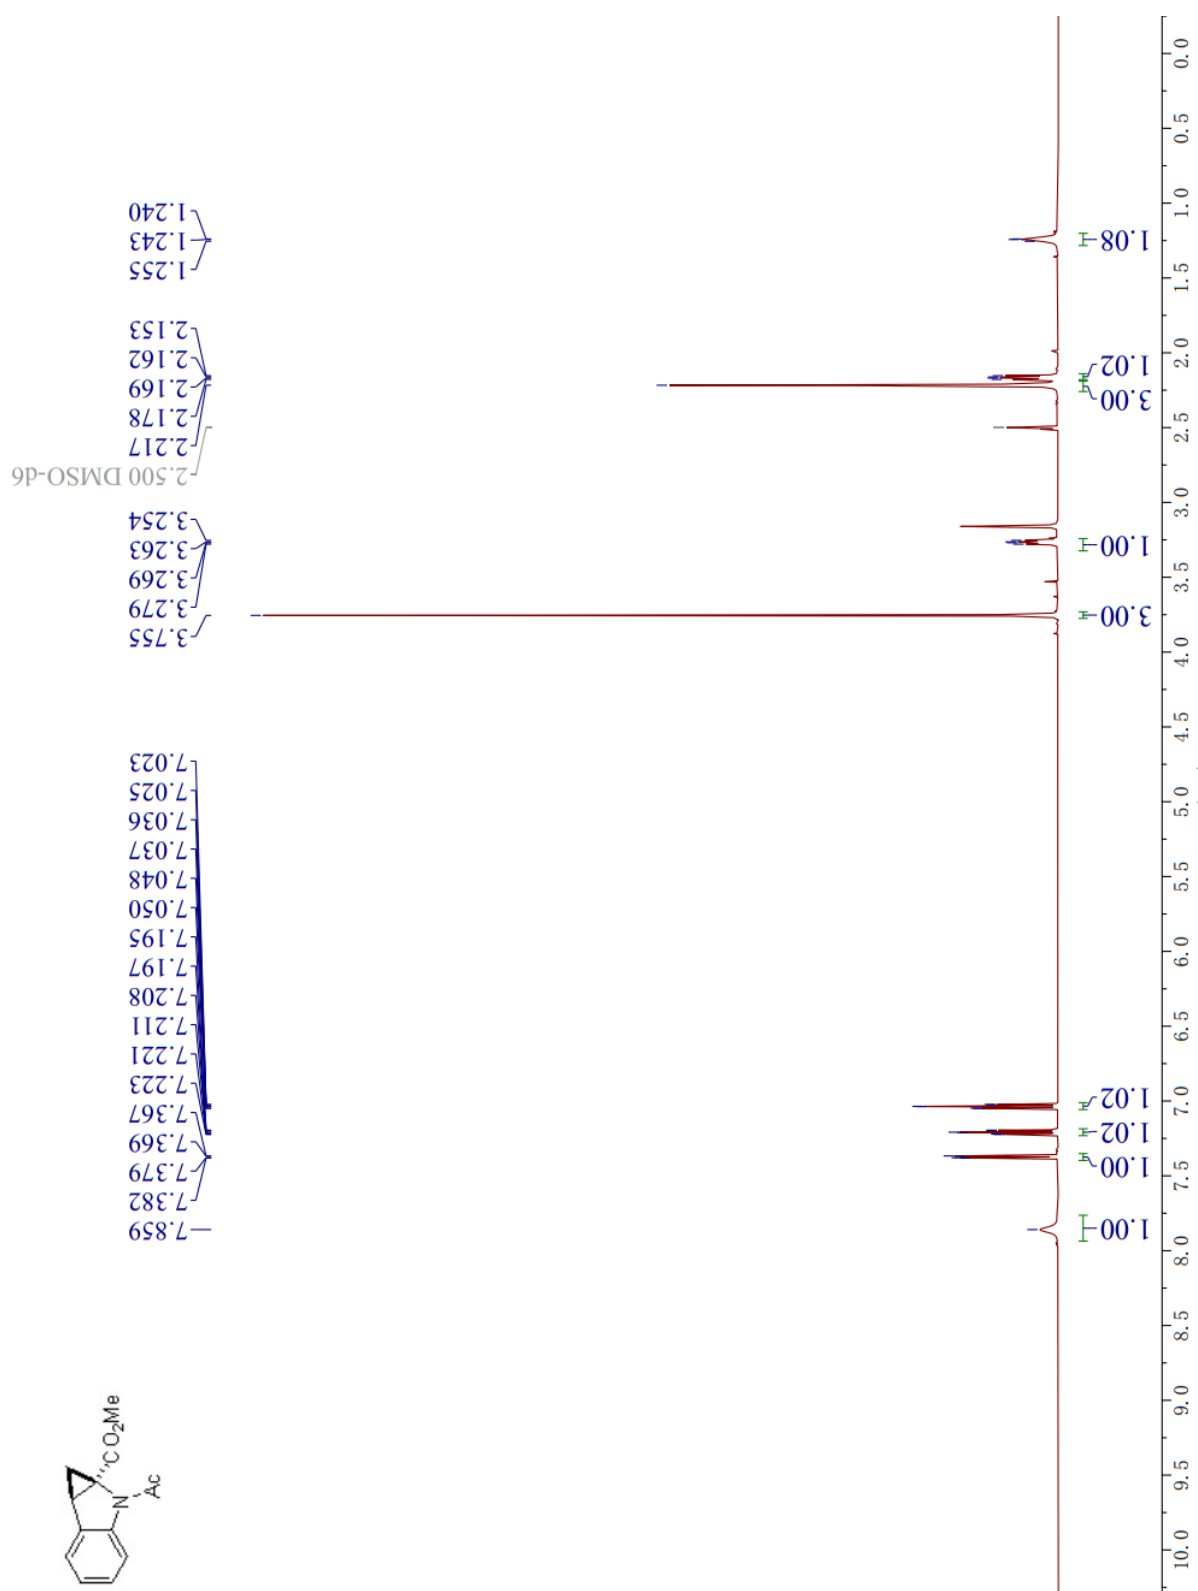



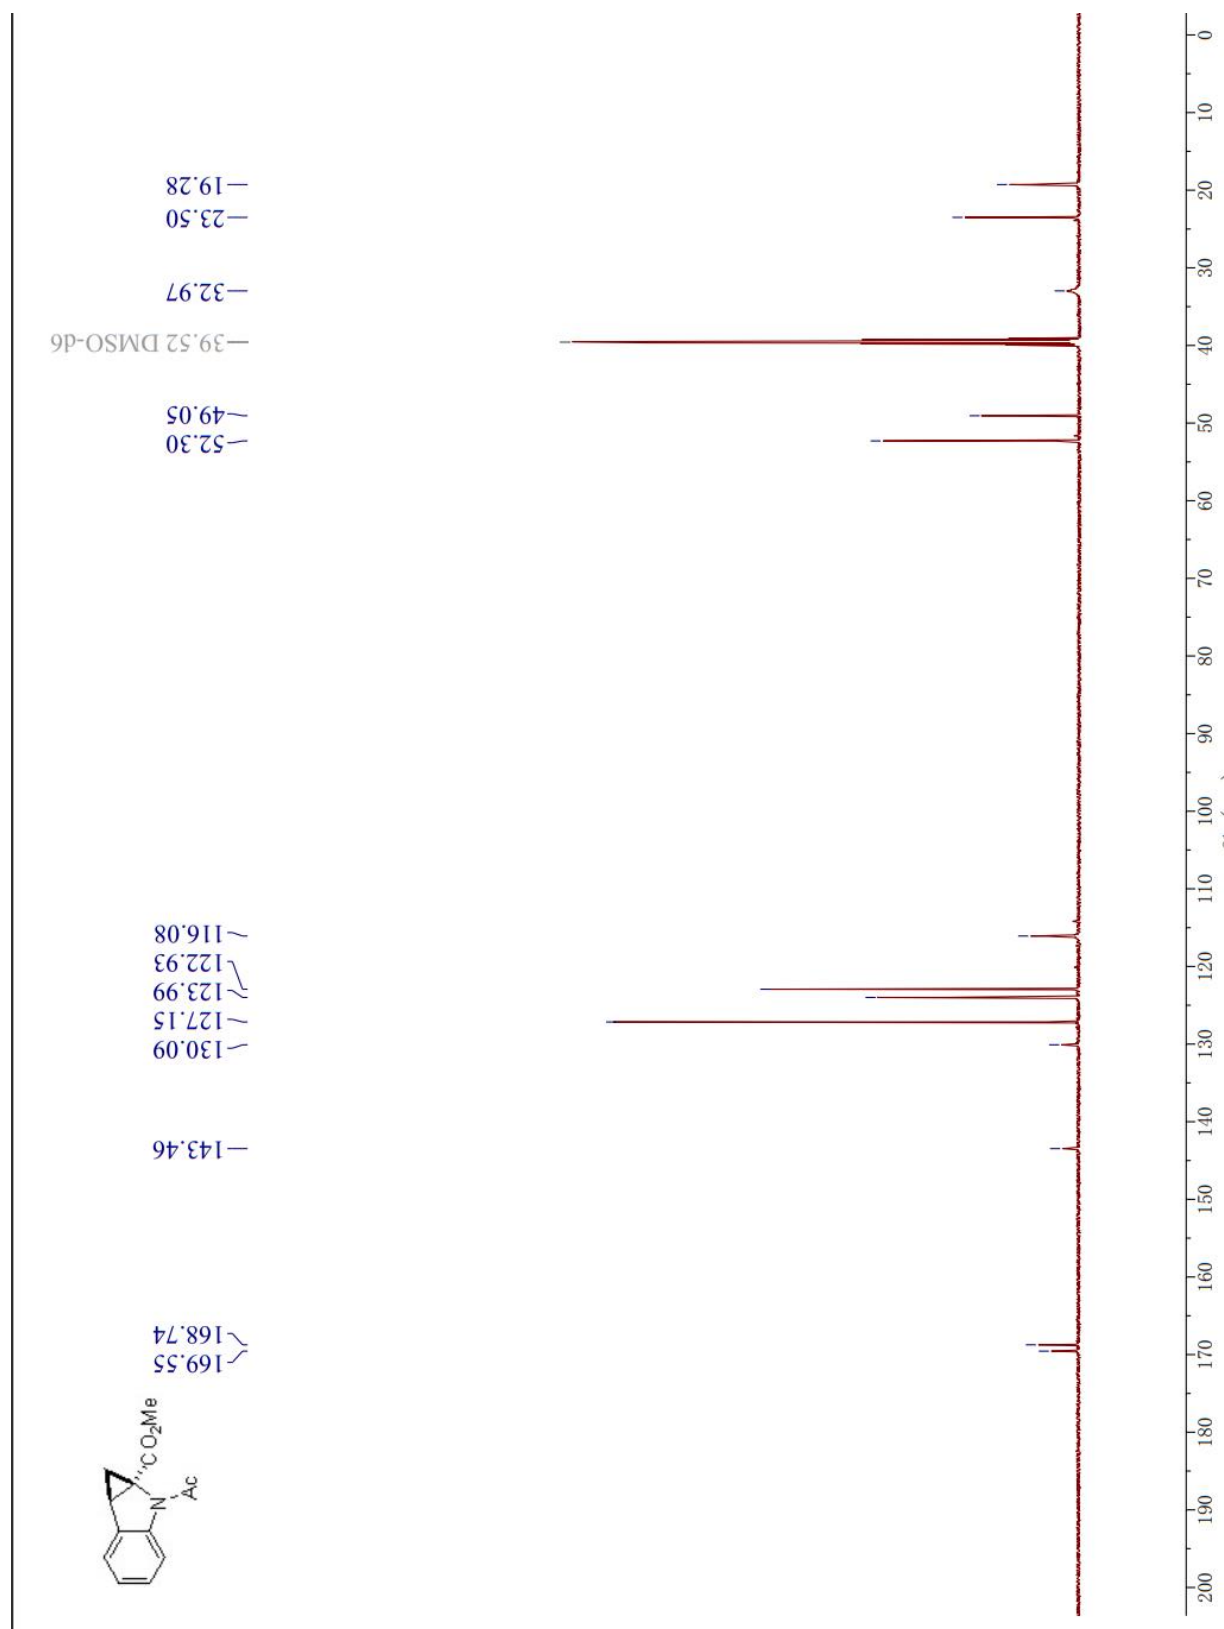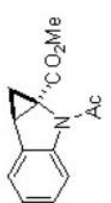

5c

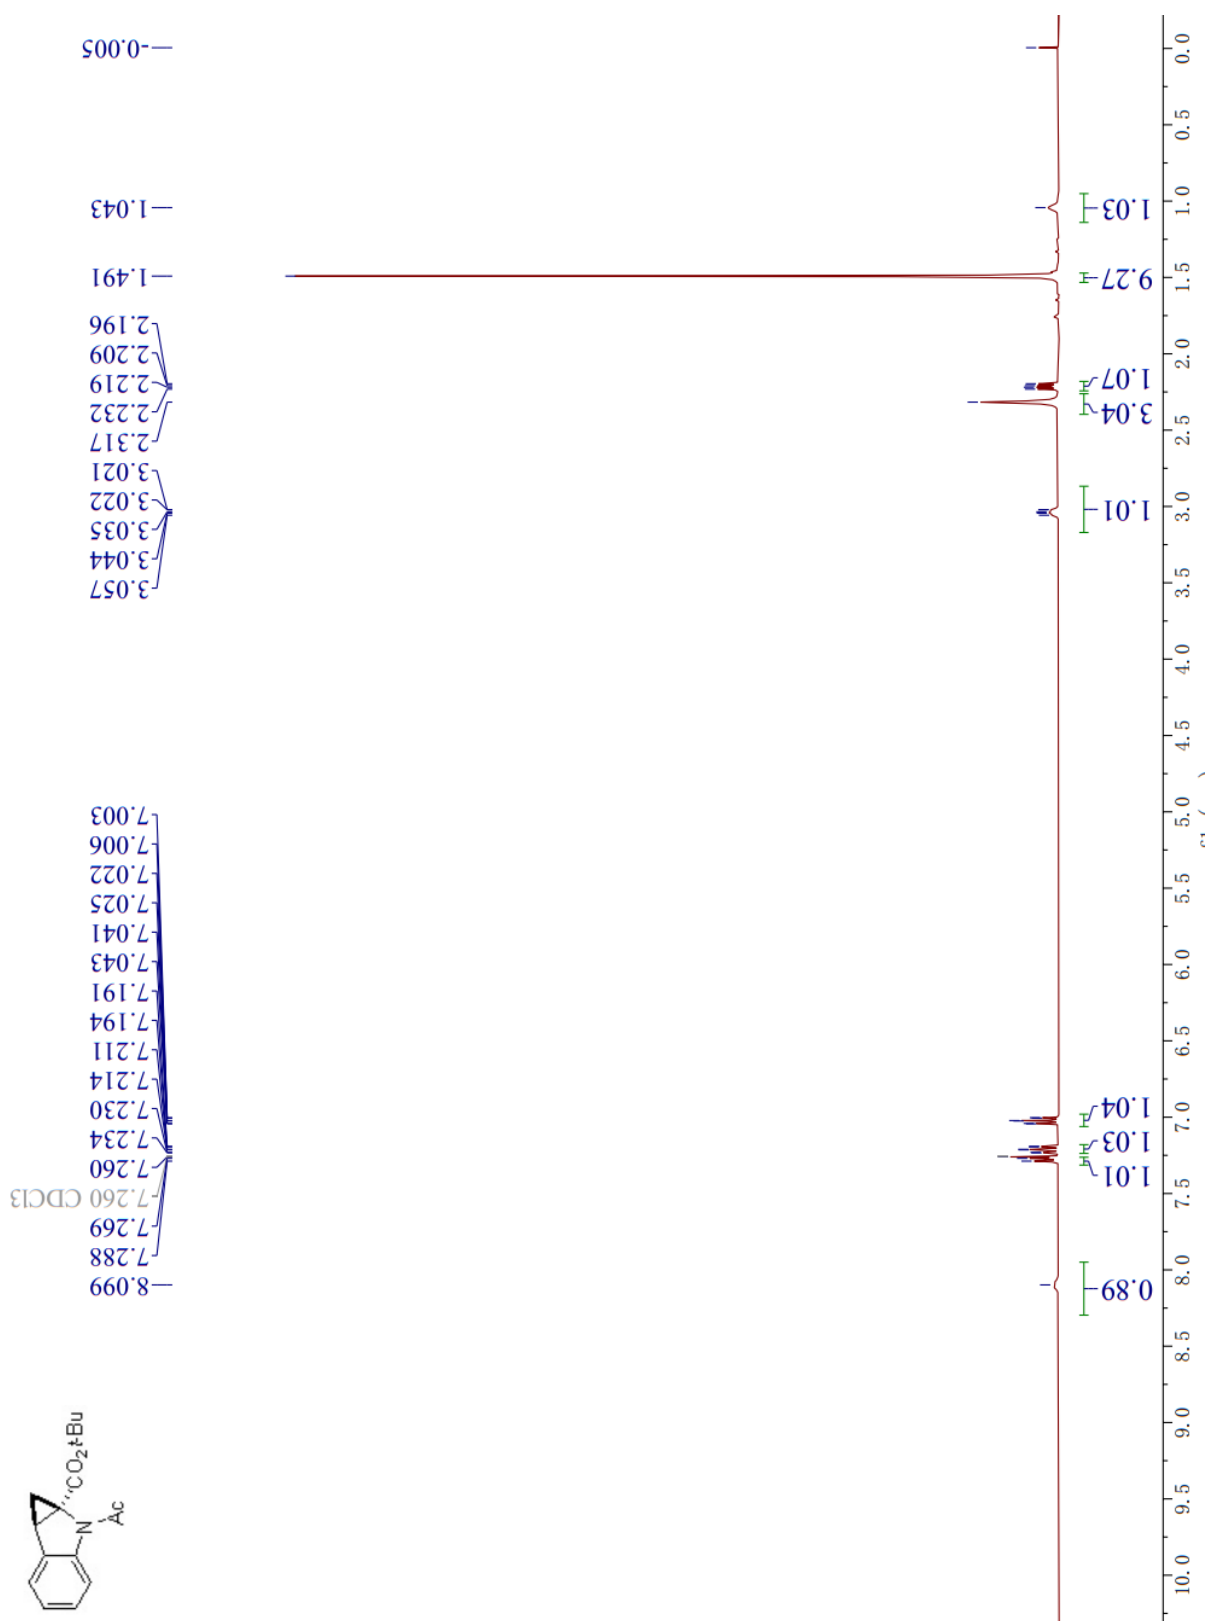

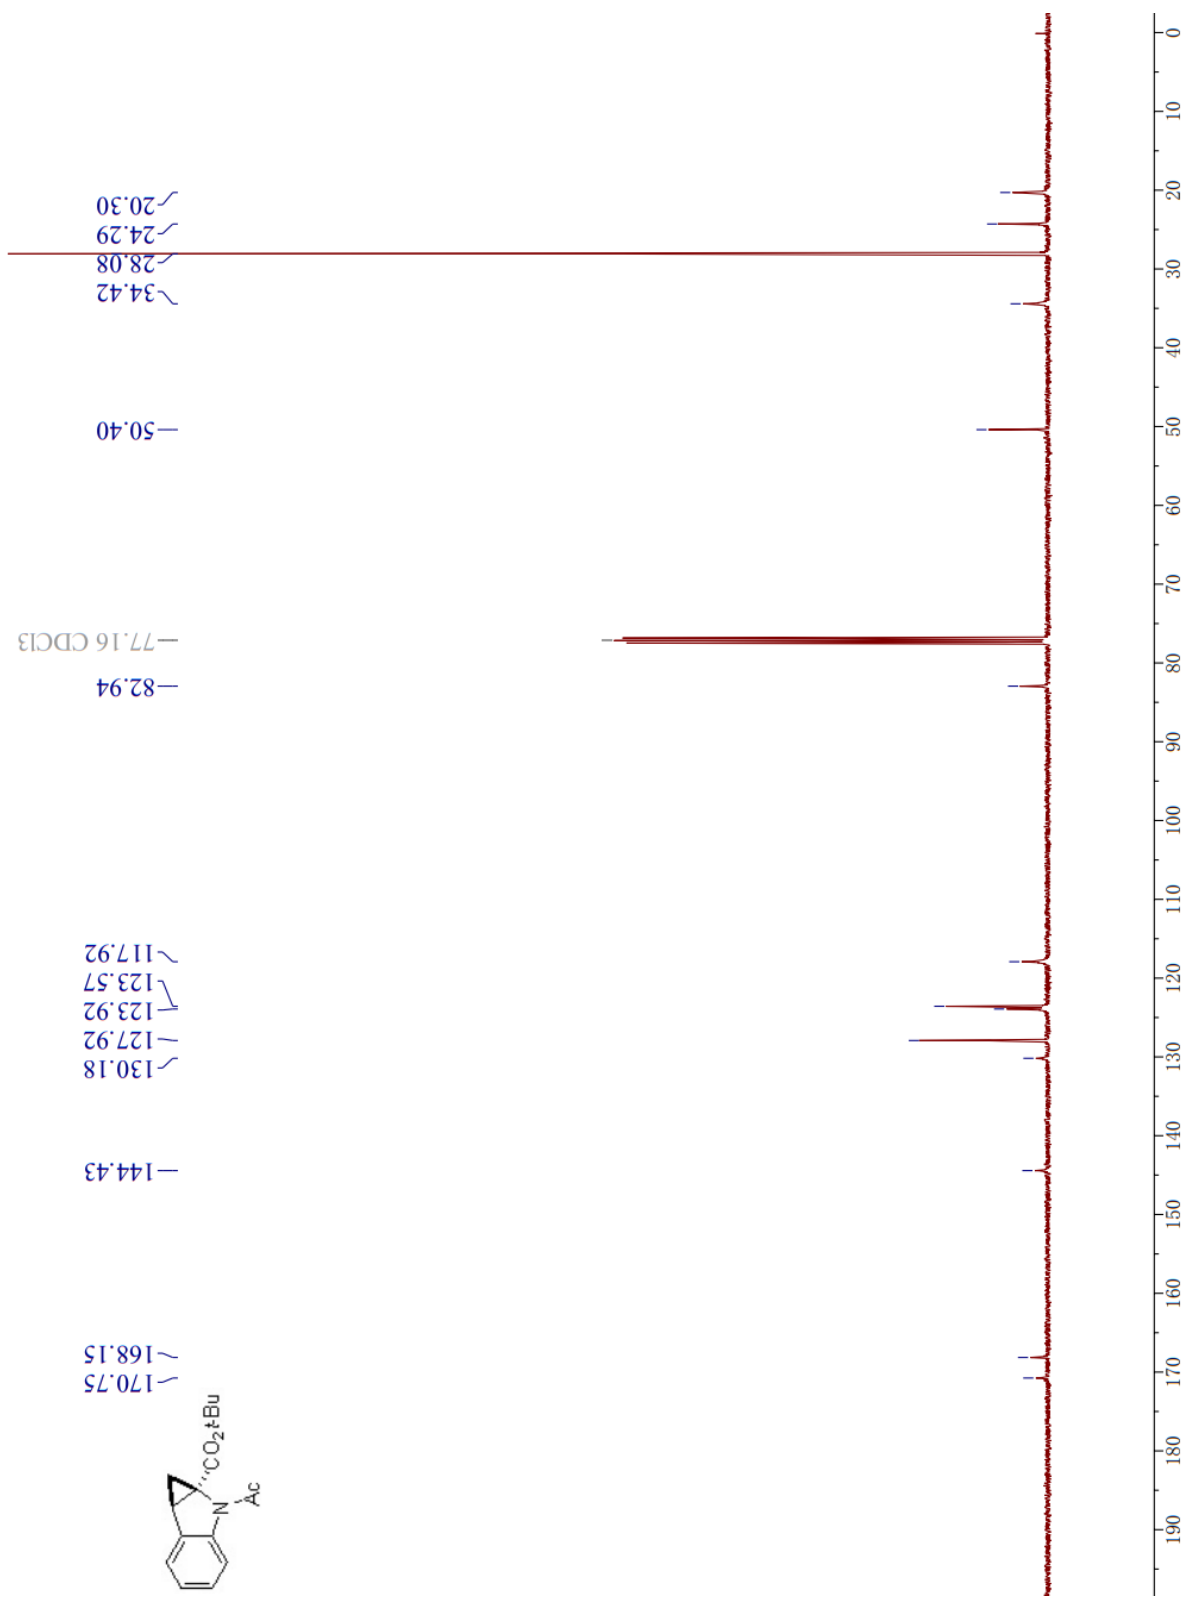

5d

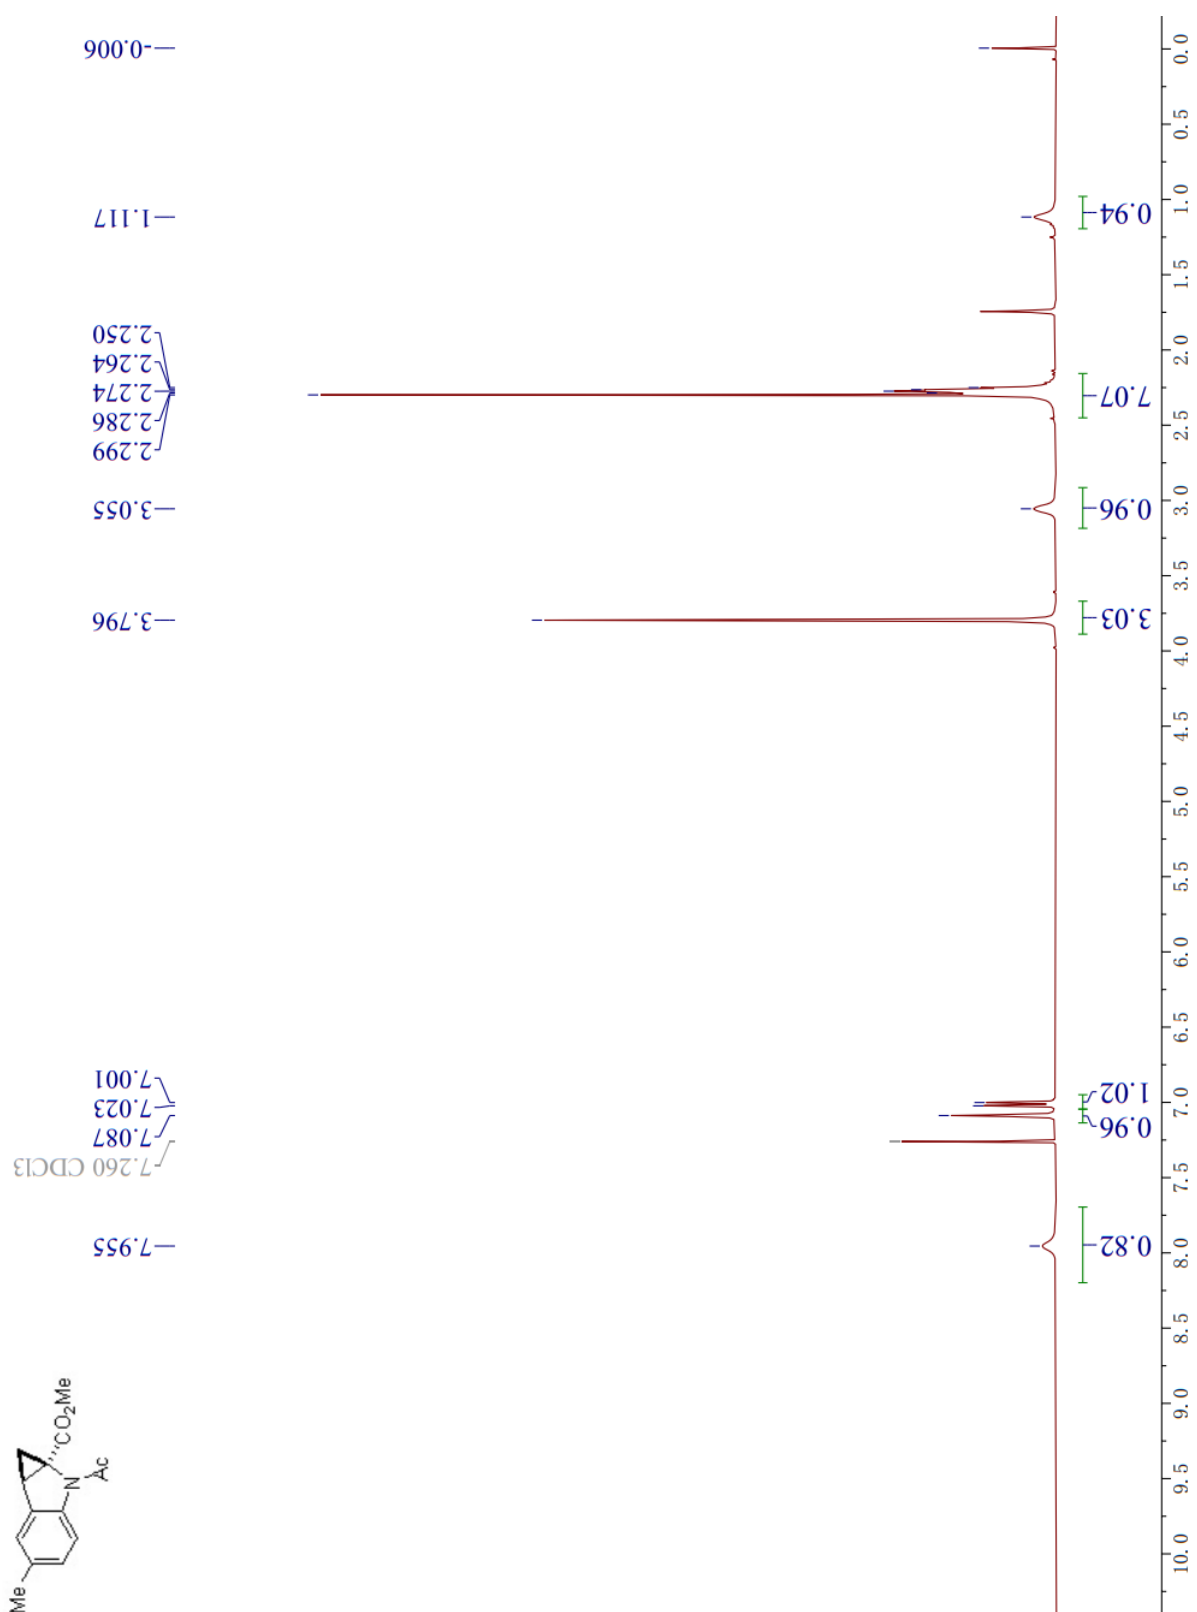

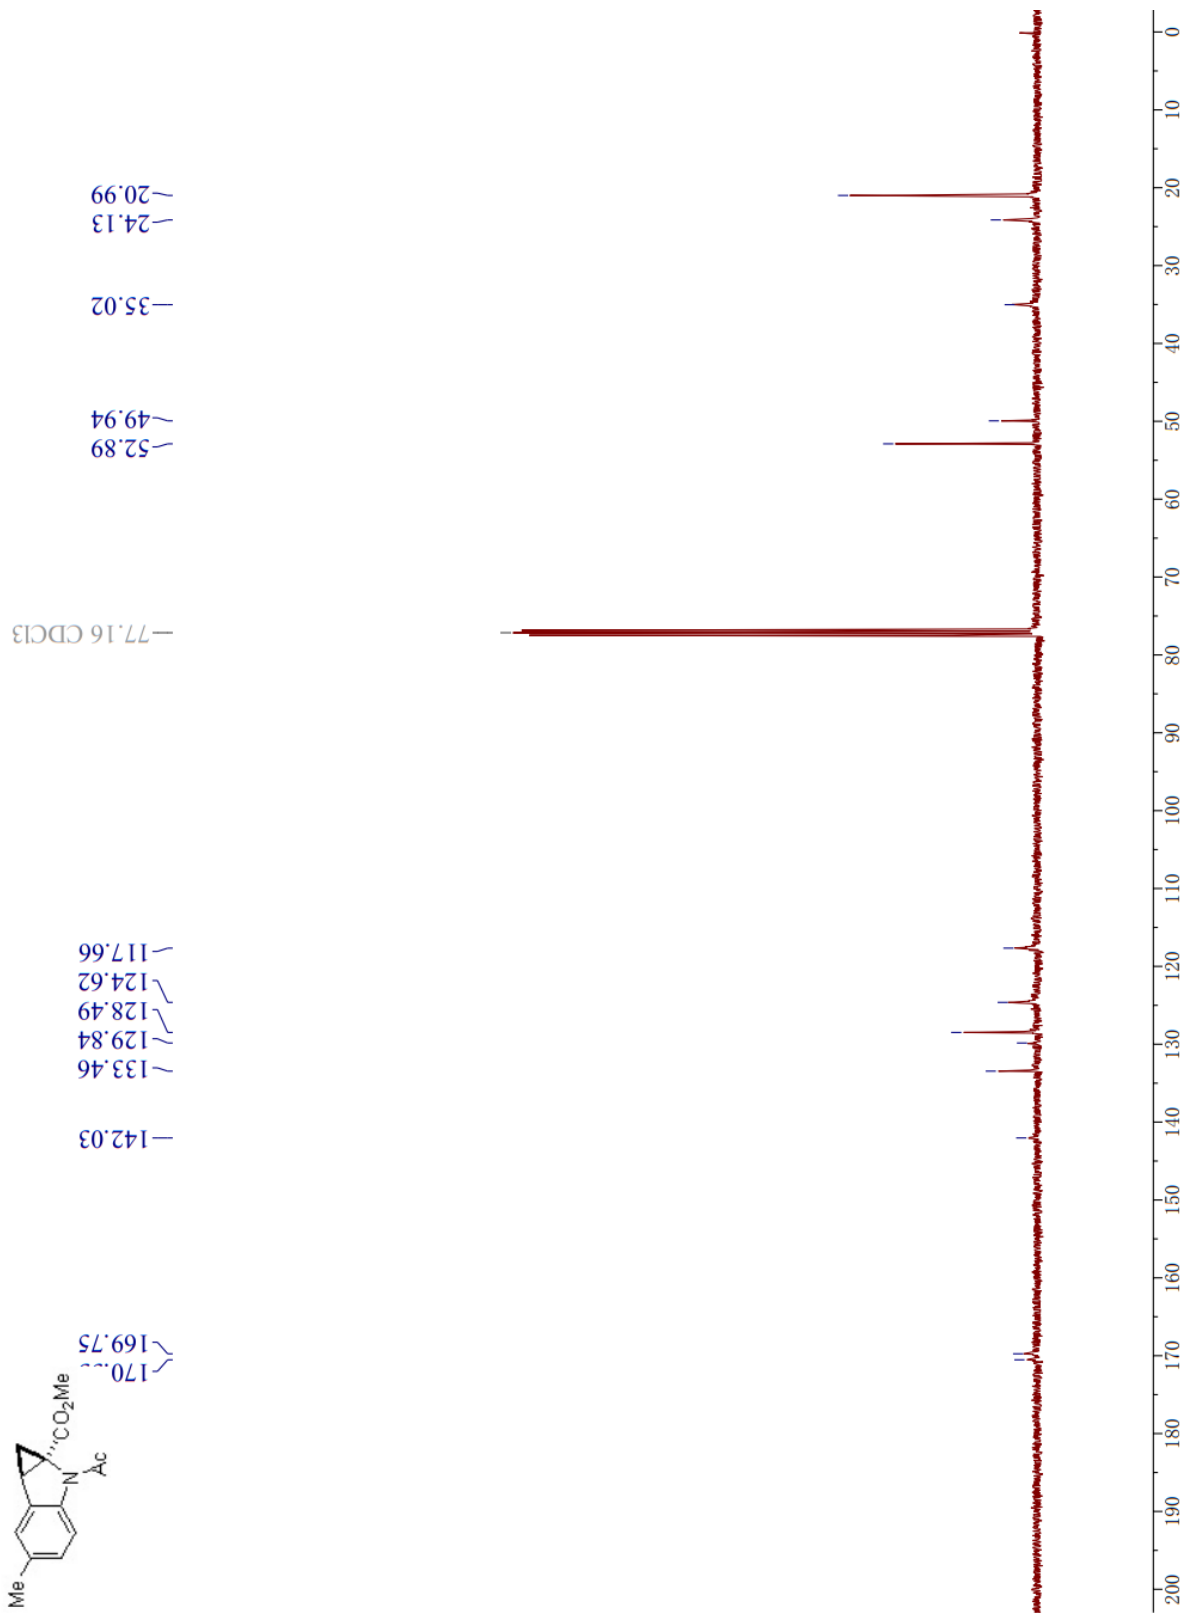

5e

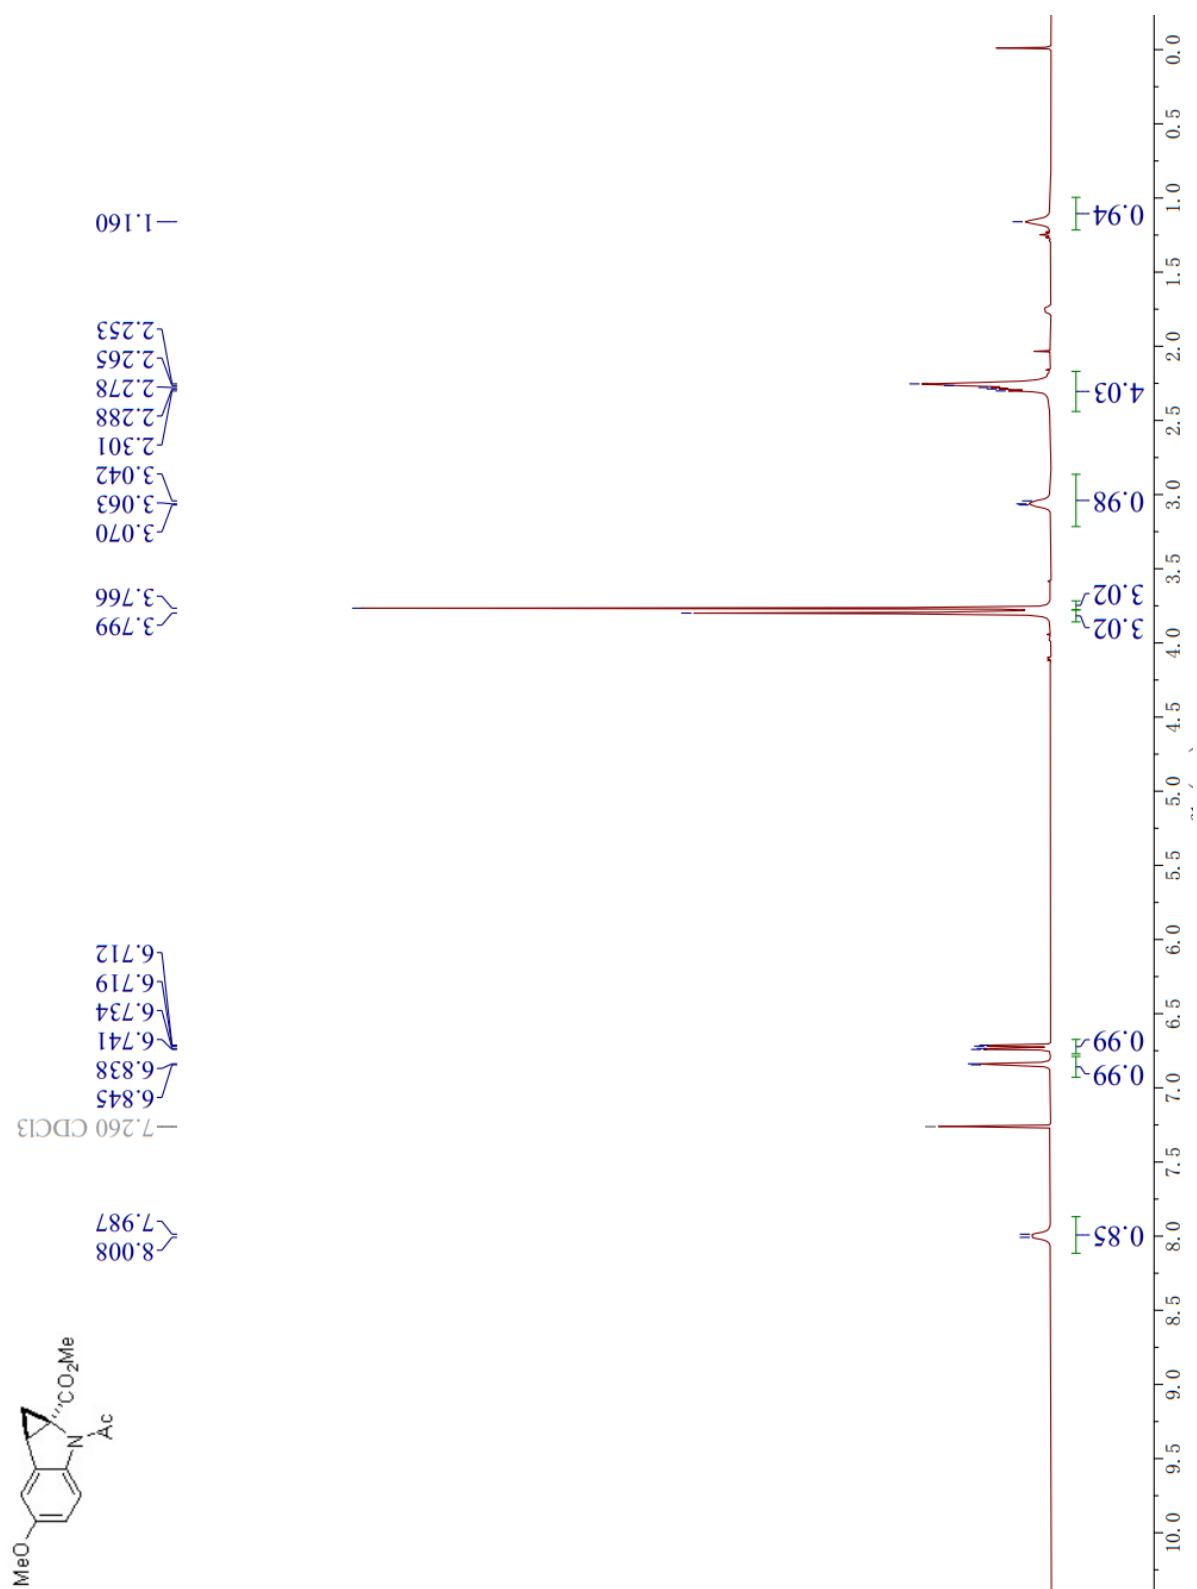

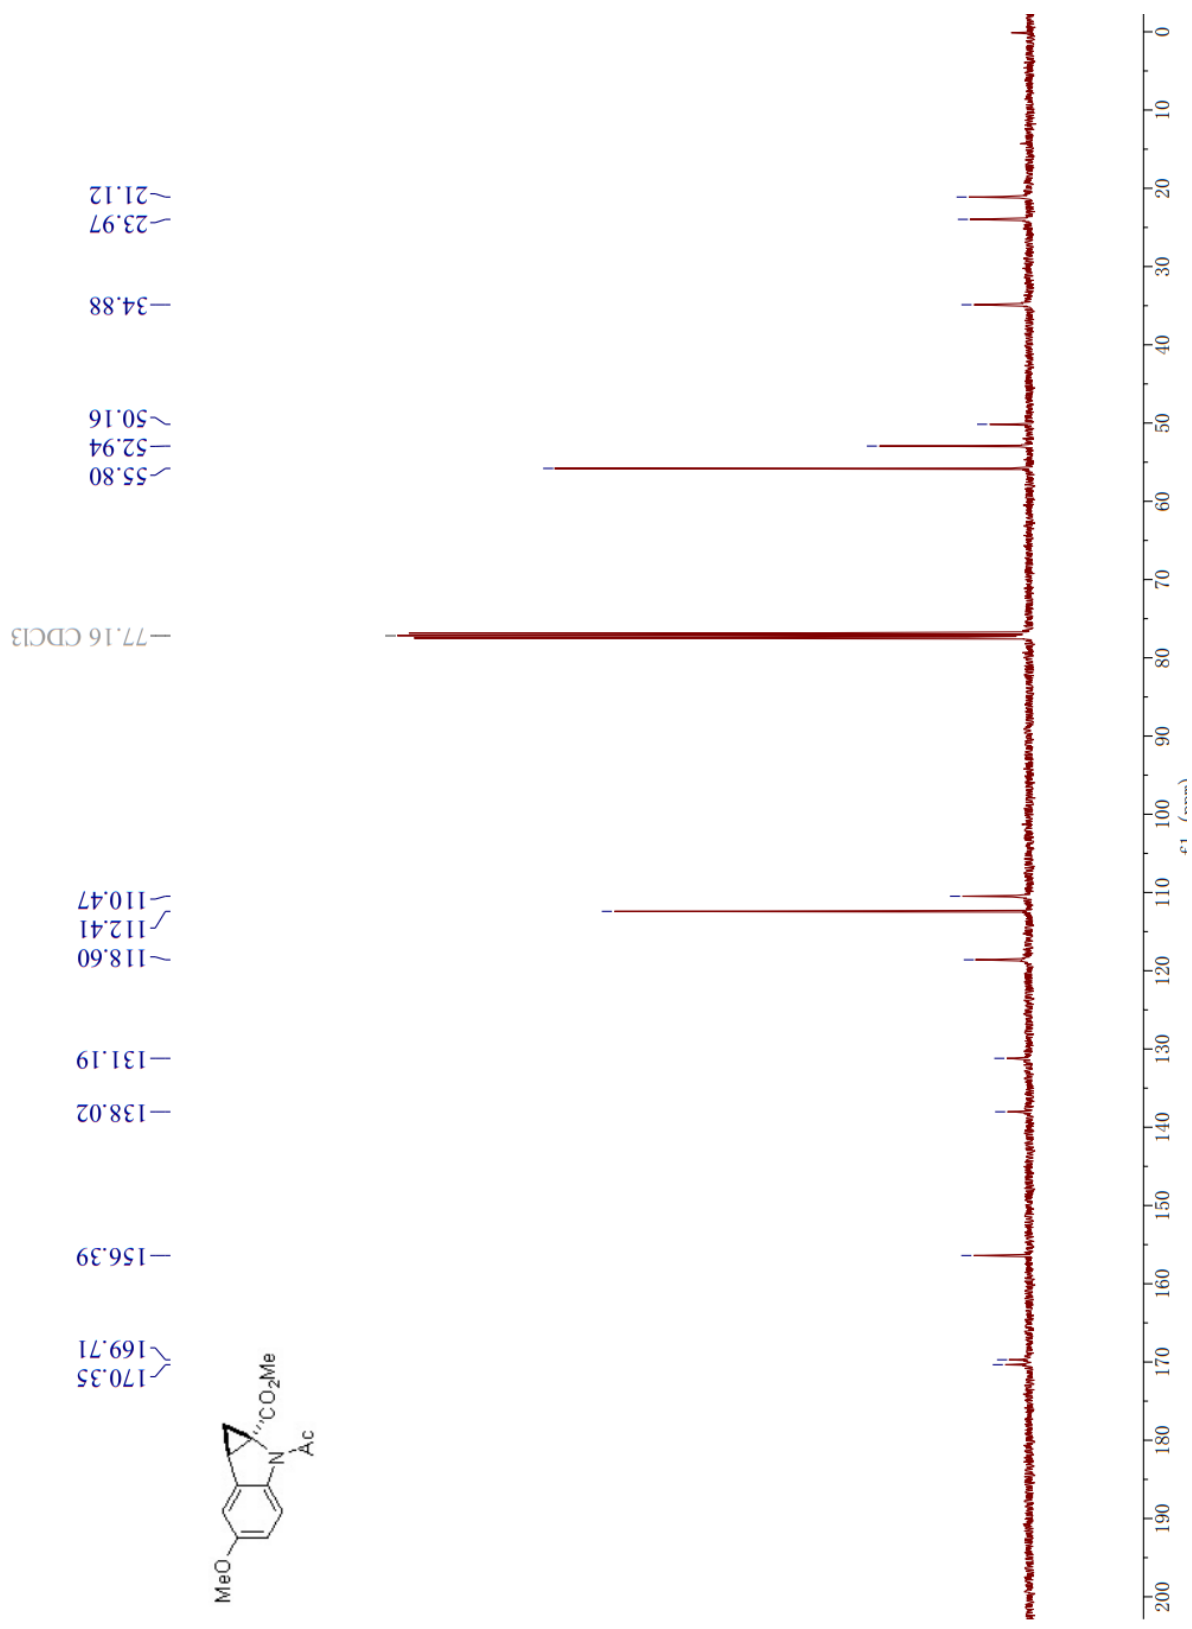

5f

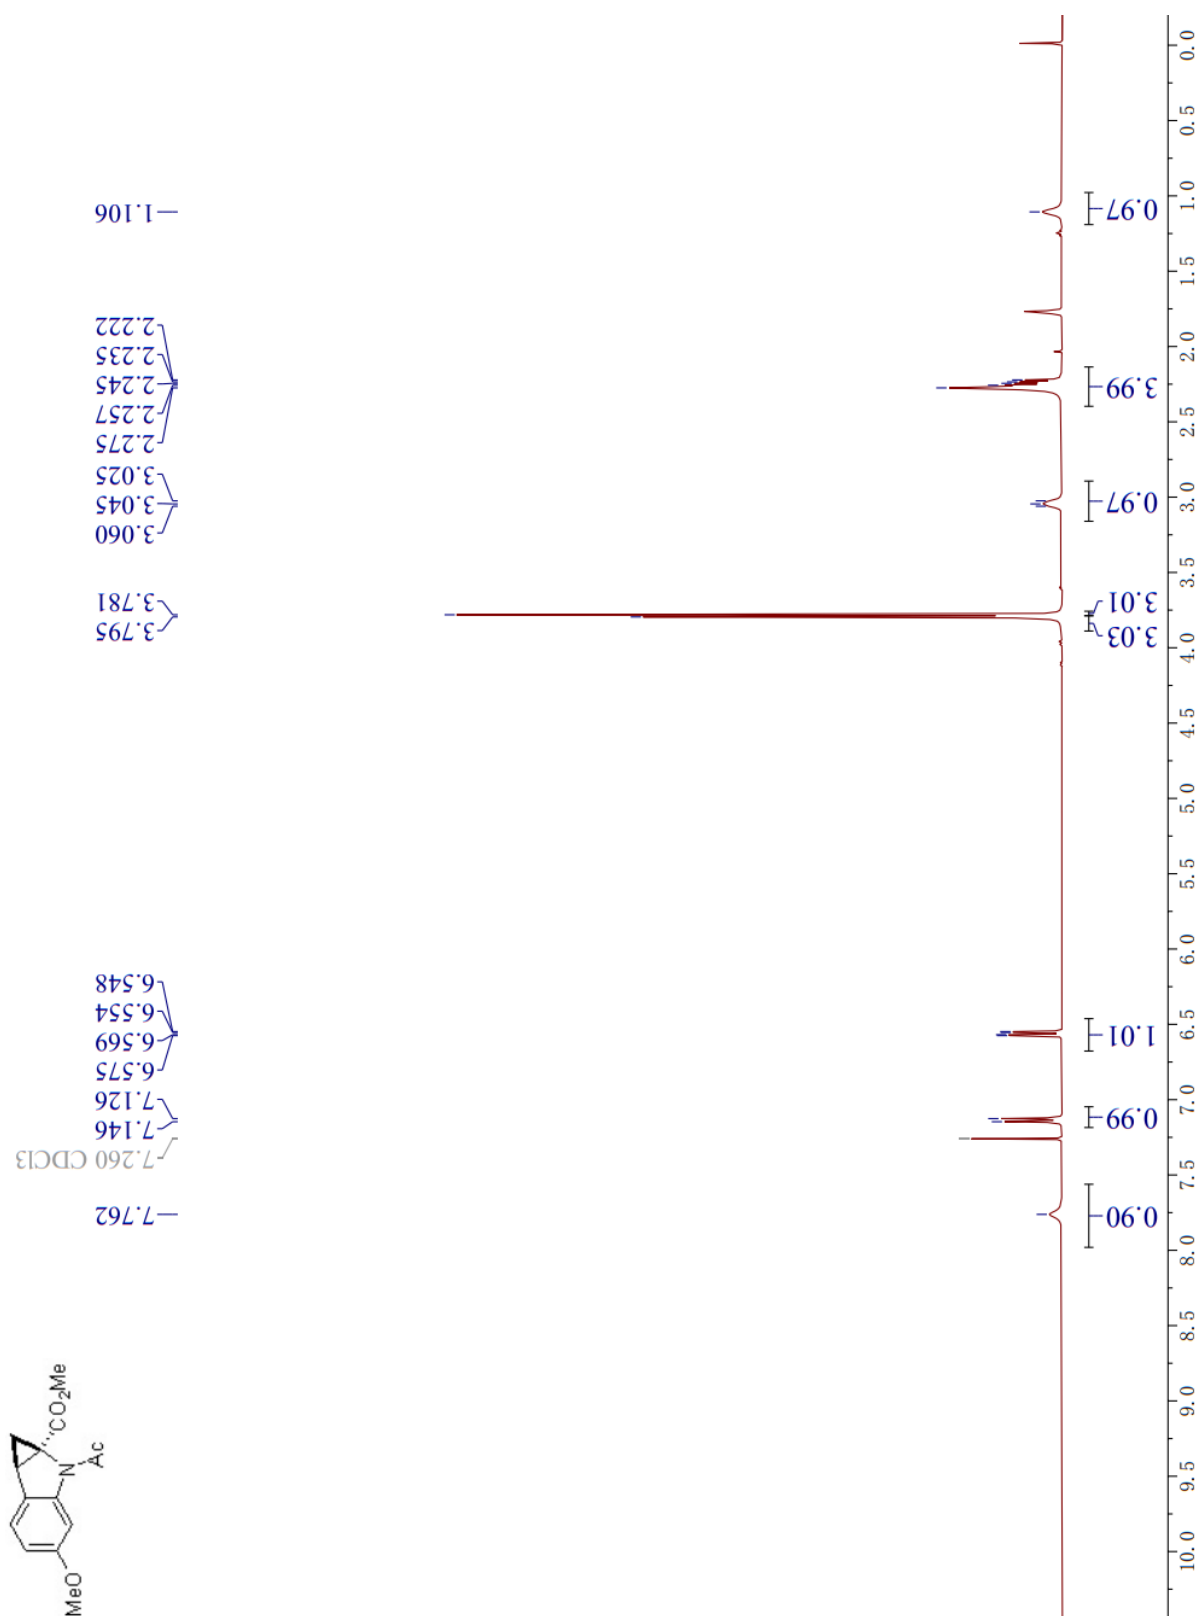



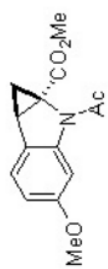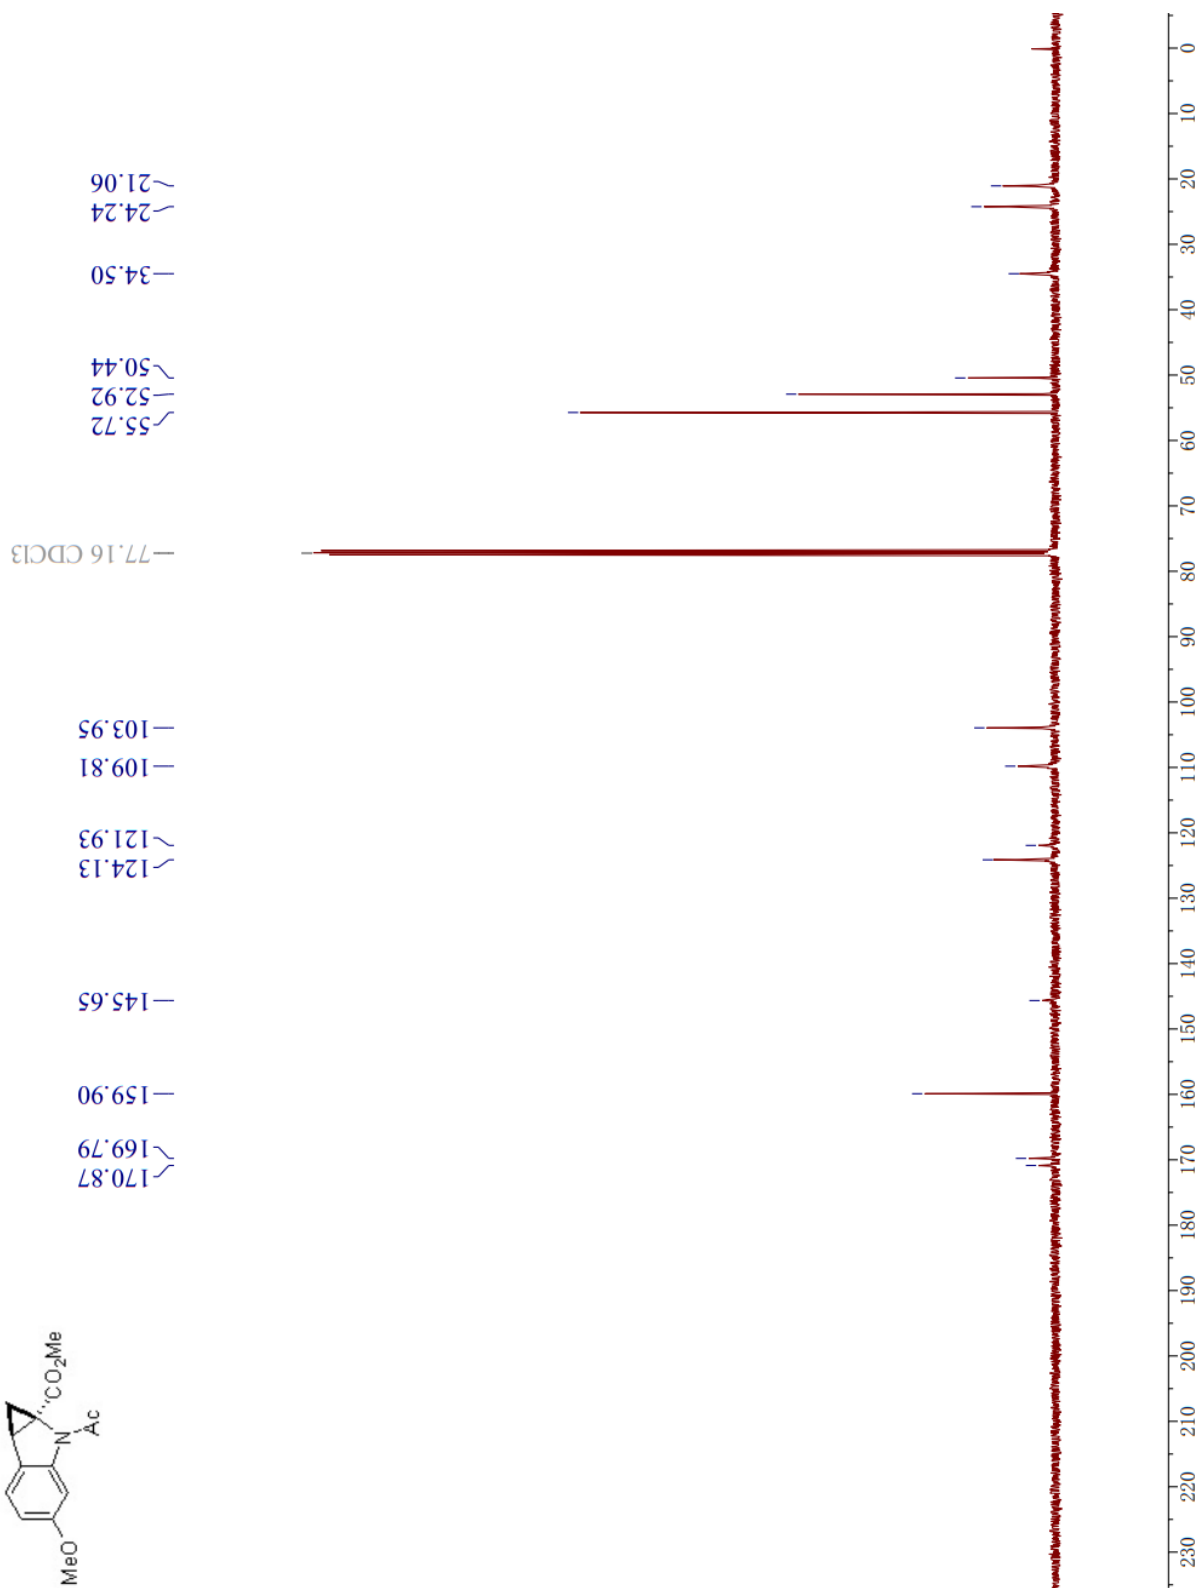

5g

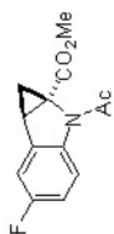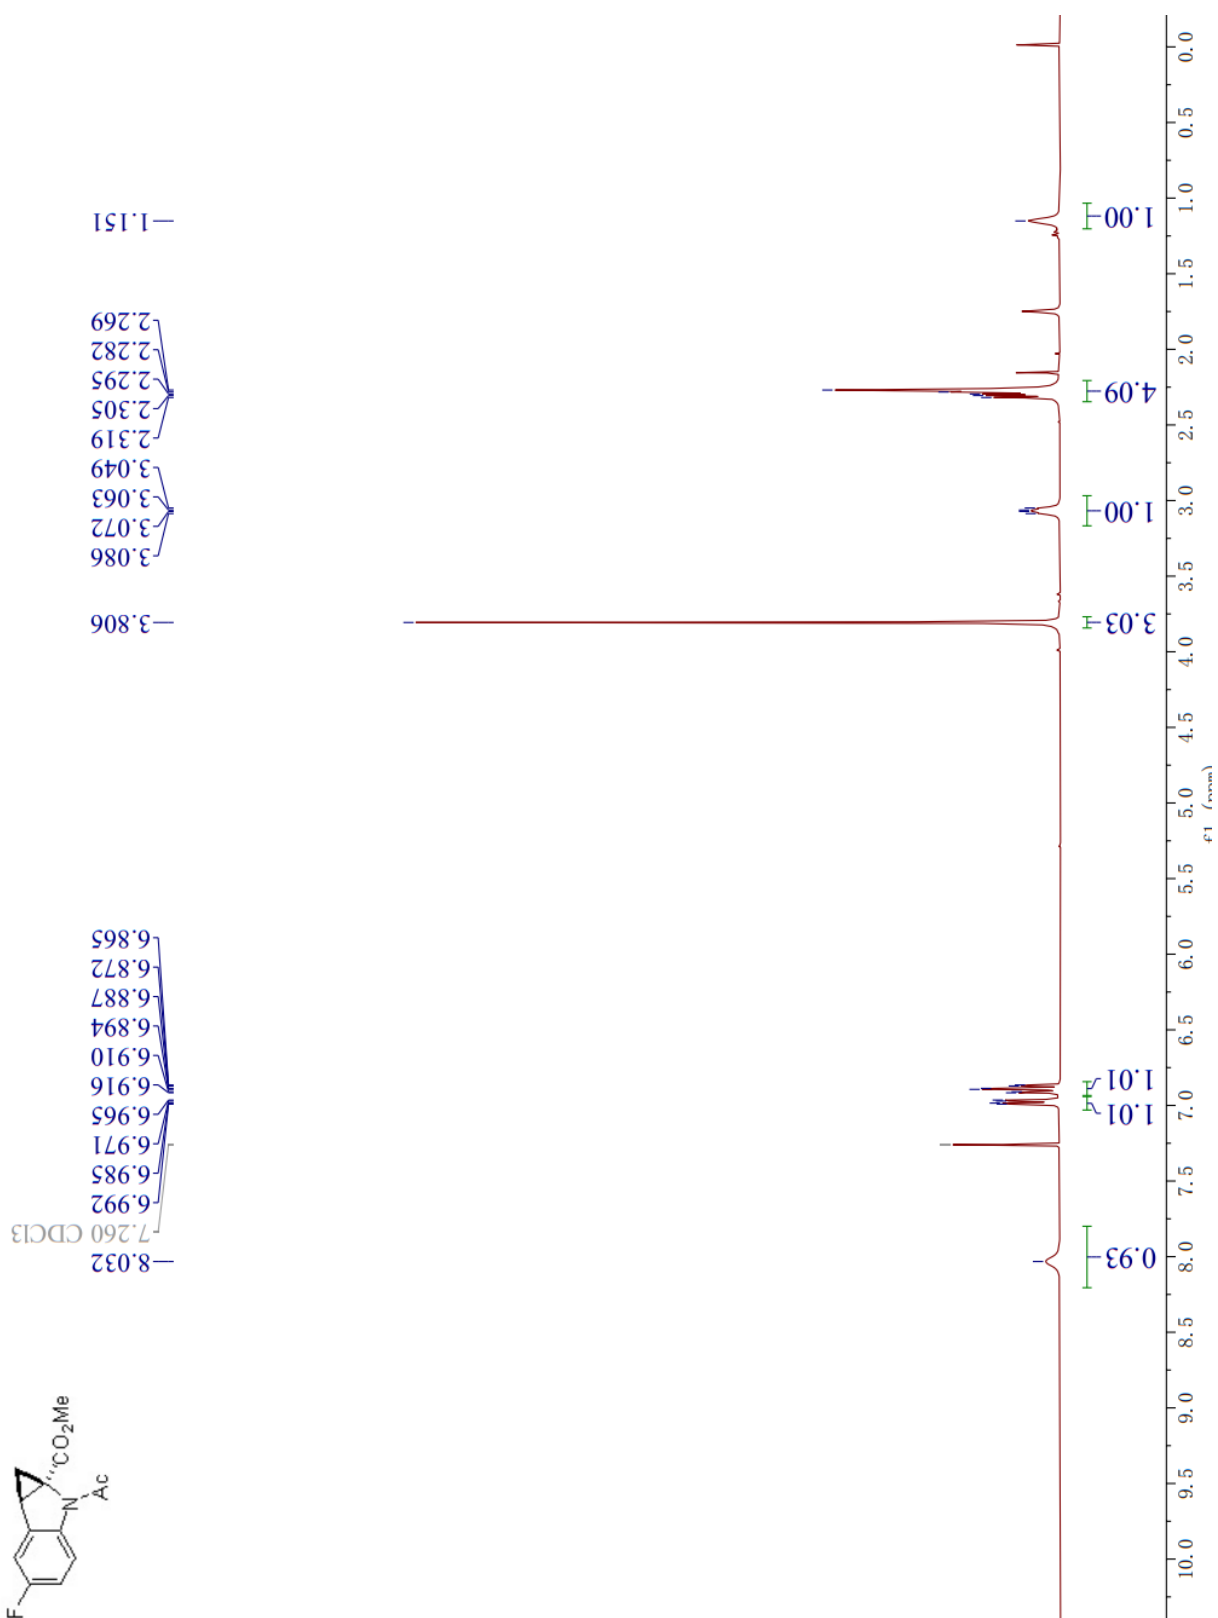

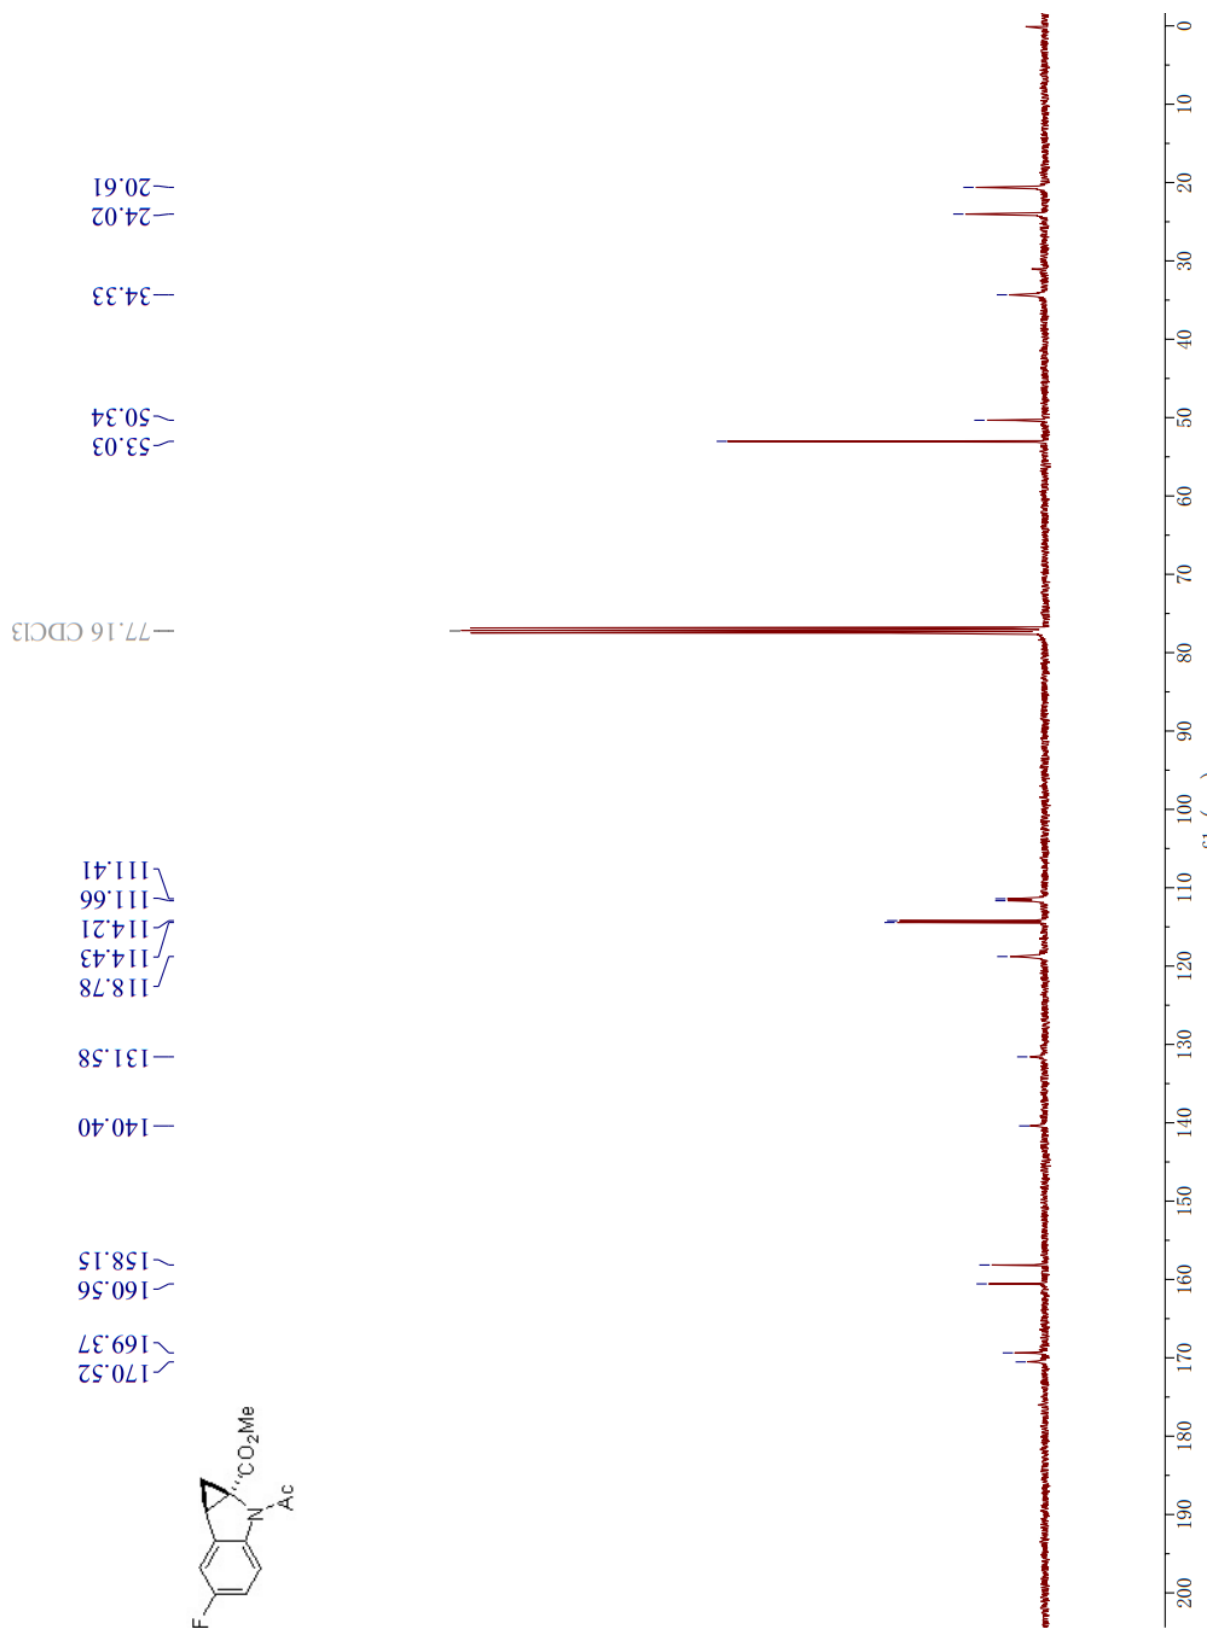

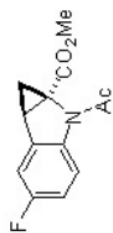

—119.27

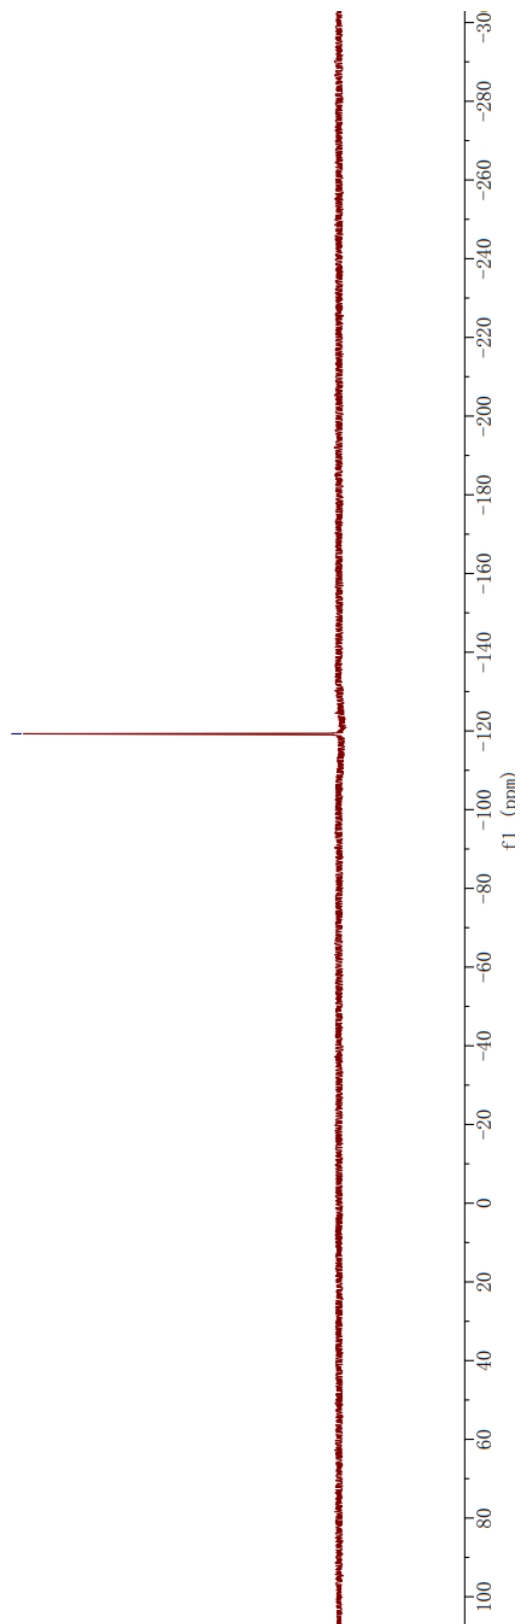

5h

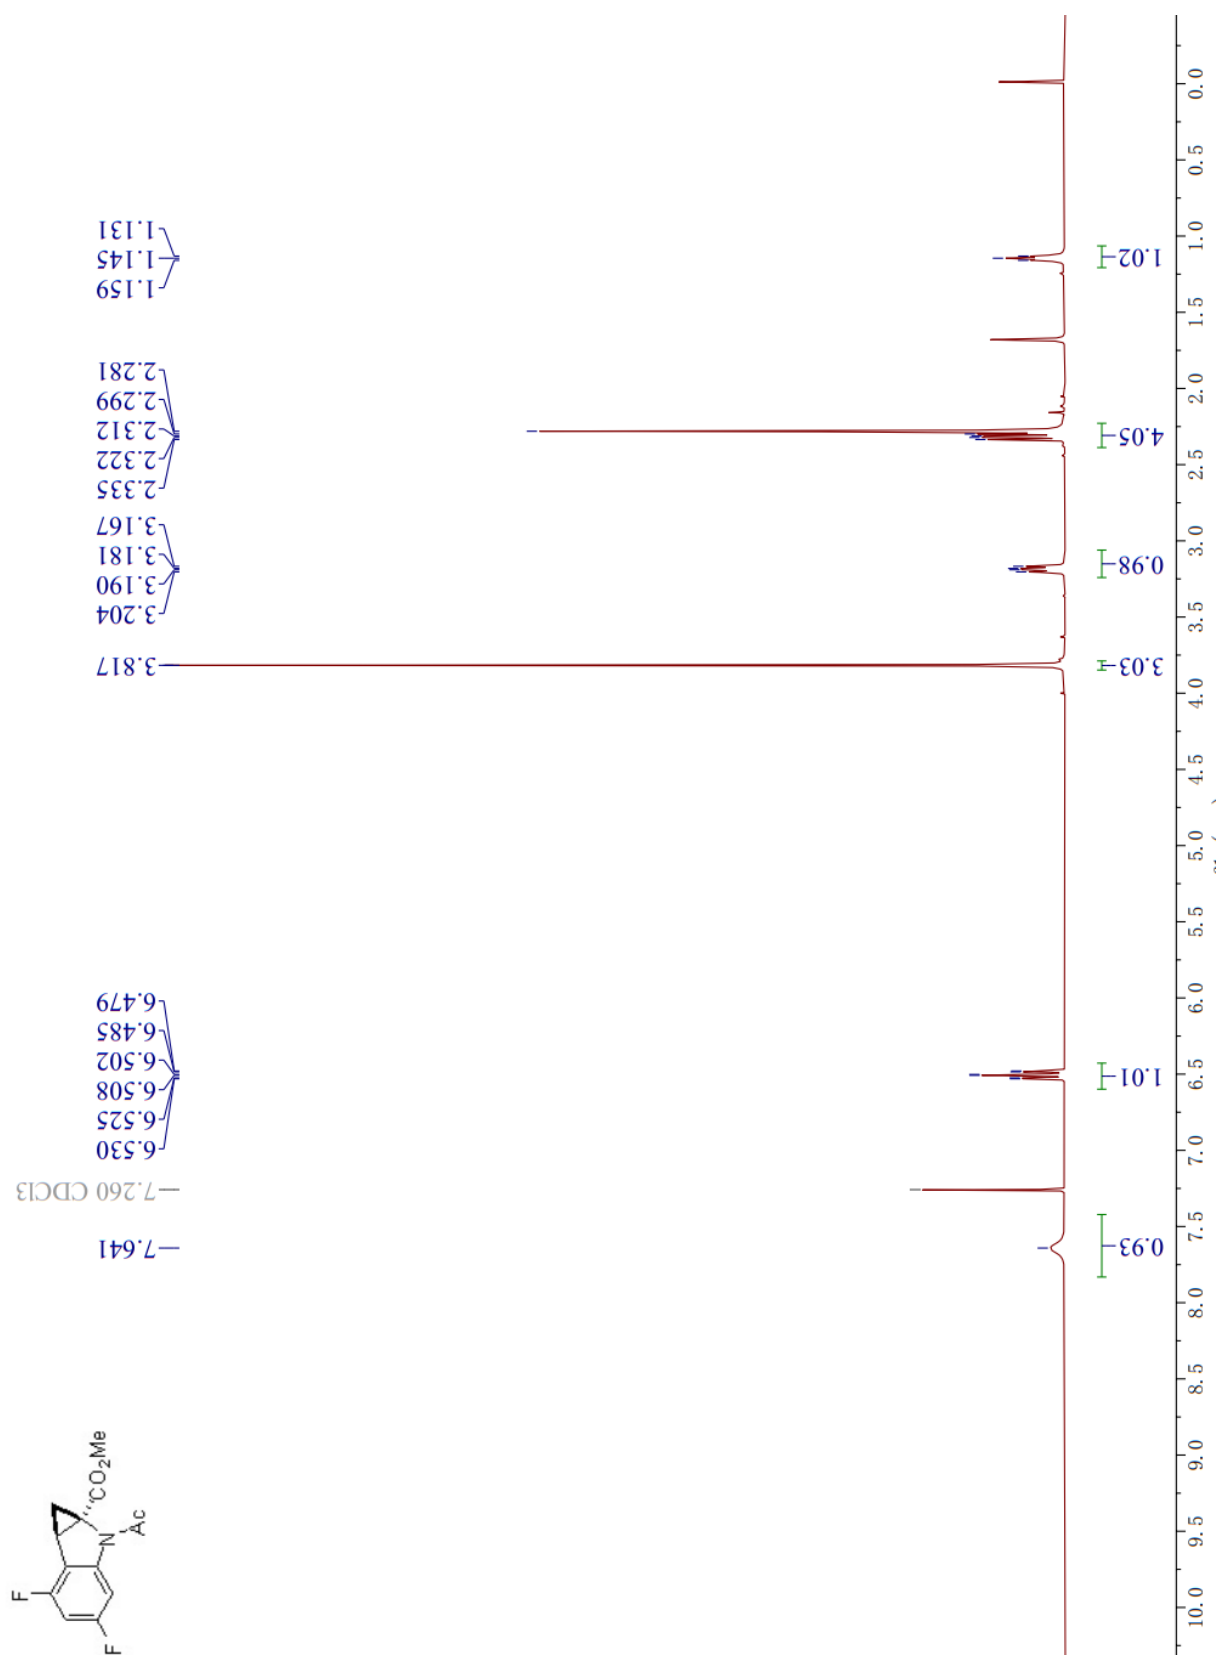

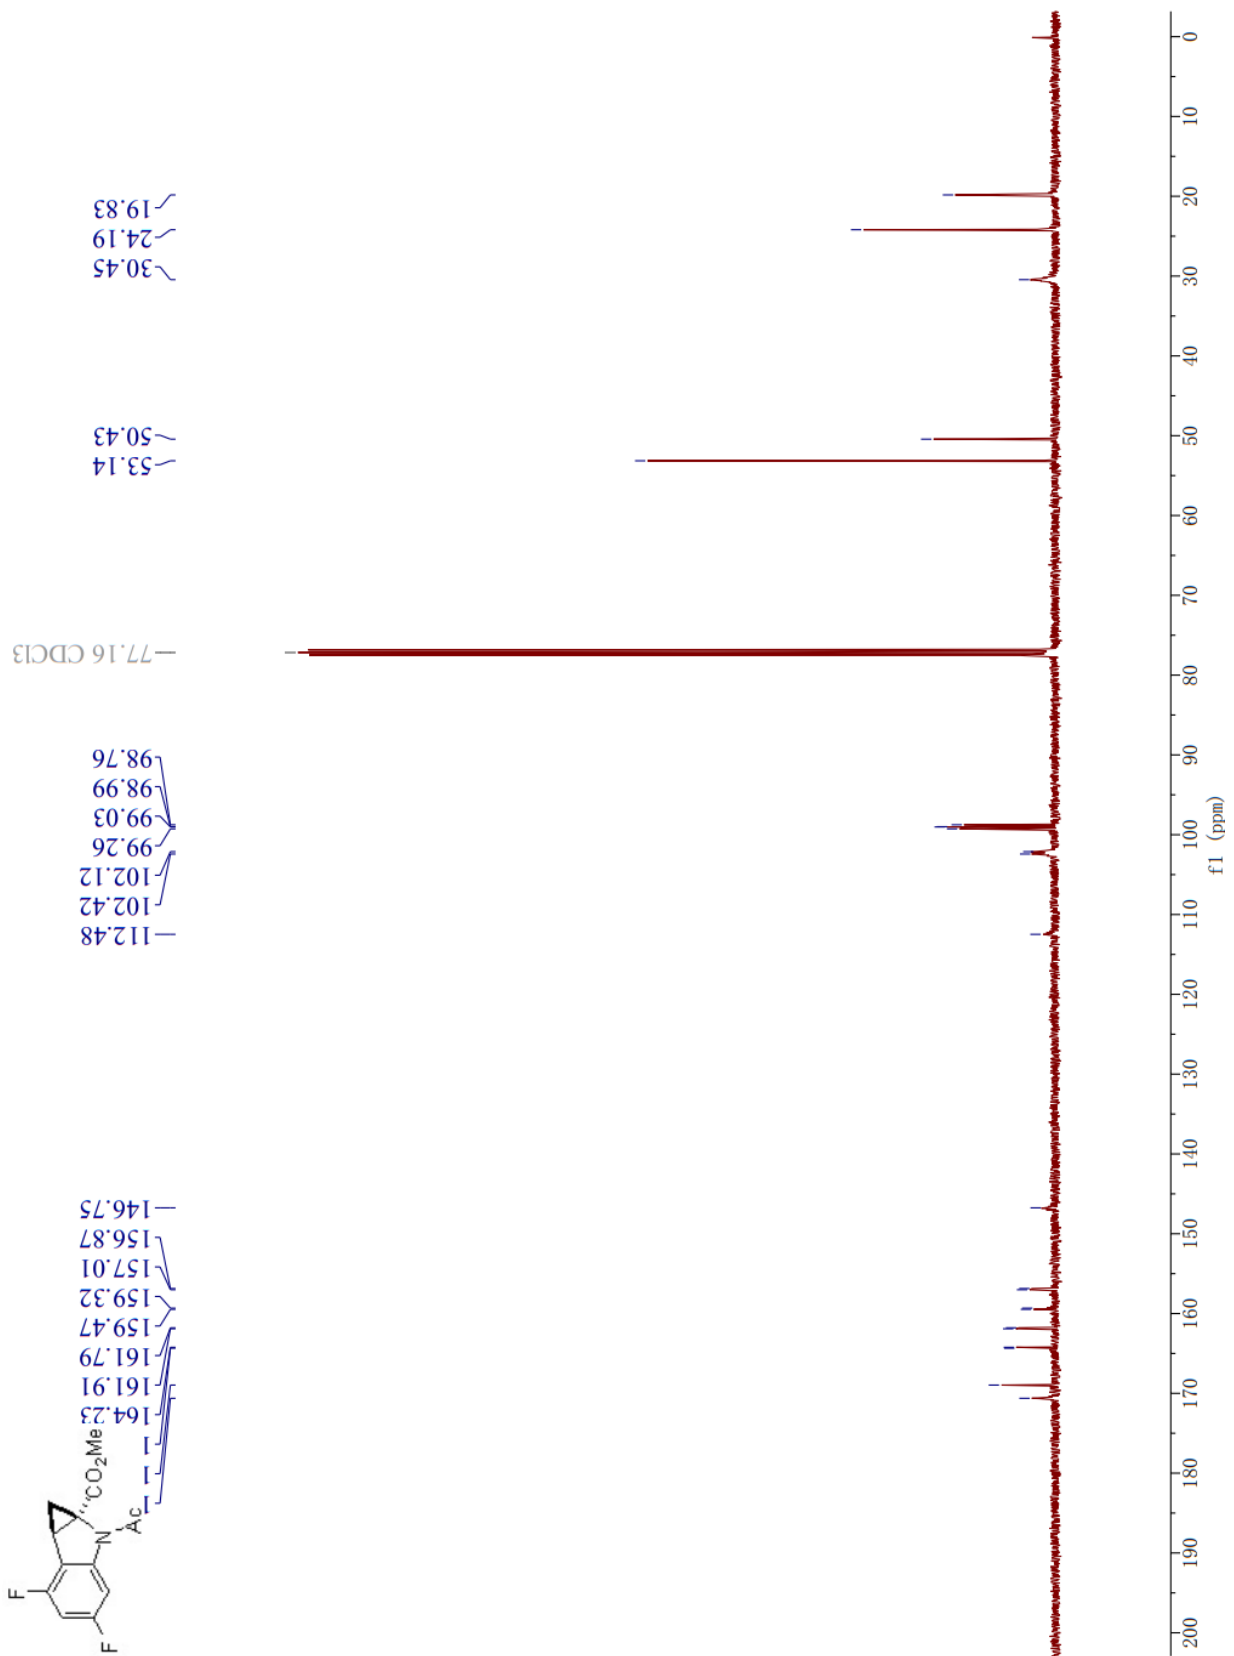

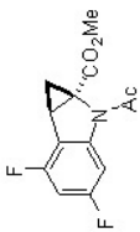

-108.79  
-108.81  
-108.82  
-108.83  
-108.84  
-108.86

--117.72

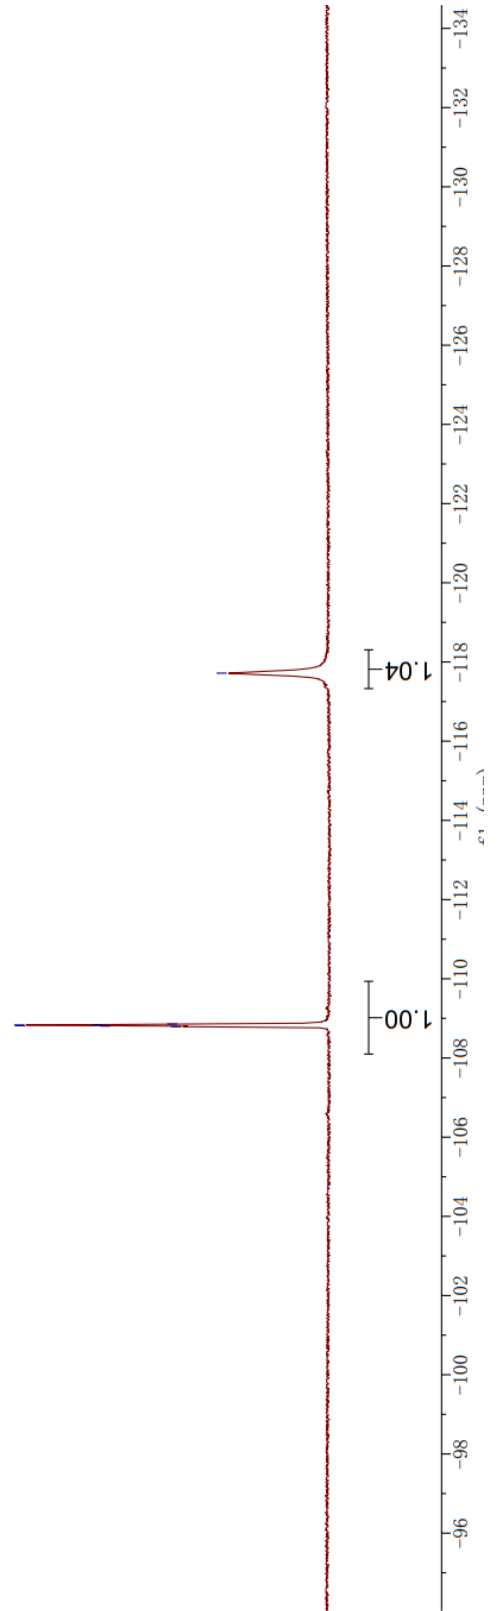

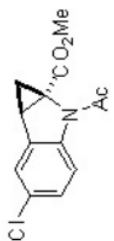

7.260 CDCl<sub>3</sub>

8.009  
7.156  
7.162  
7.178  
7.183  
7.237  
7.243

3.808

3.092  
3.079  
3.069  
3.055  
2.317  
2.304  
2.294  
2.280  
2.275

1.132

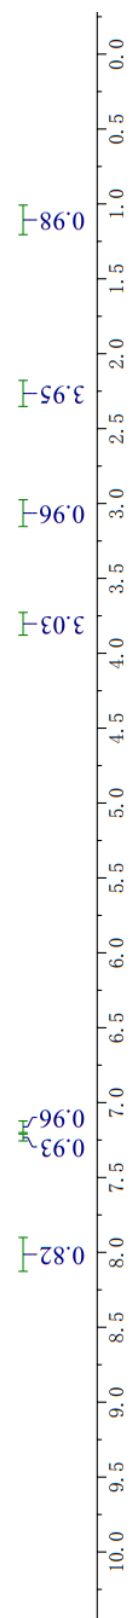



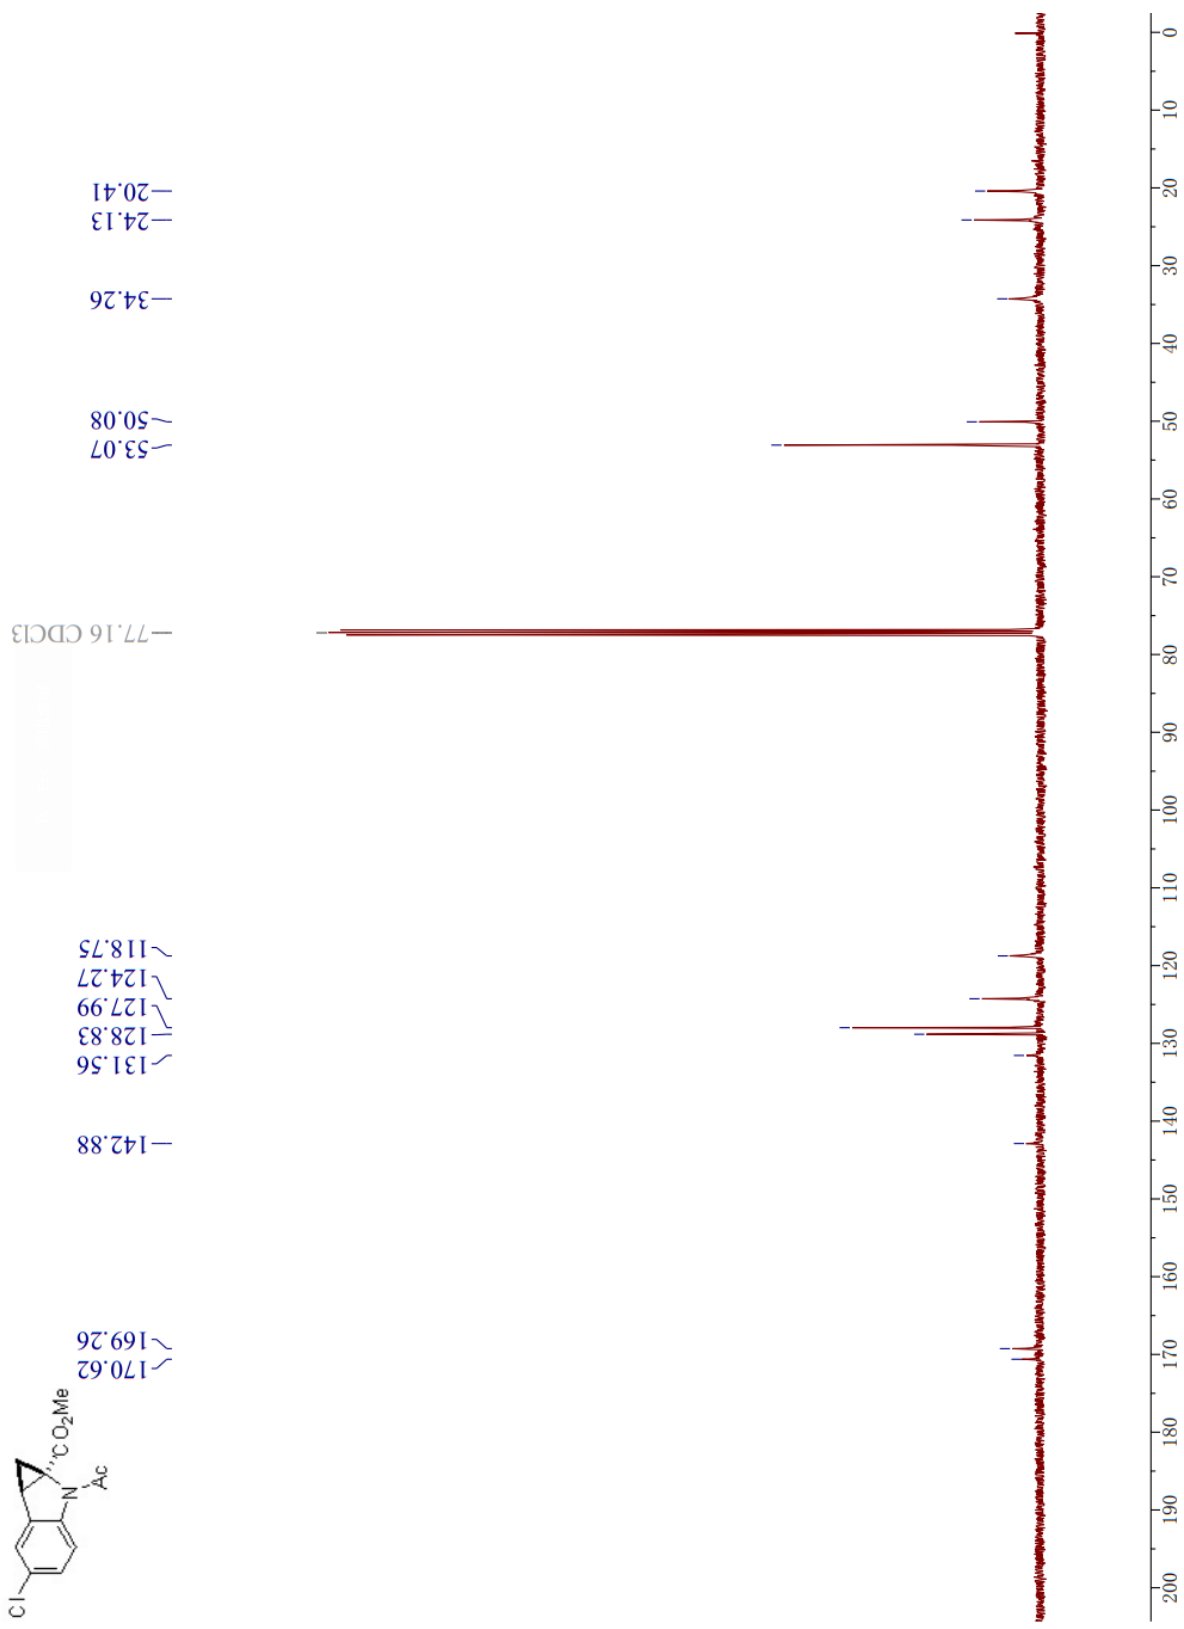

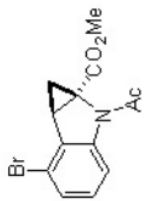

8.001  
 7.260 CDCl<sub>3</sub>  
 7.178  
 7.157  
 7.096  
 7.091  
 7.076  
 7.071  
 7.056  
 7.051

3.813  
 3.209  
 3.185  
 3.171  
 2.359  
 2.346  
 2.336  
 2.323  
 2.284  
 1.154

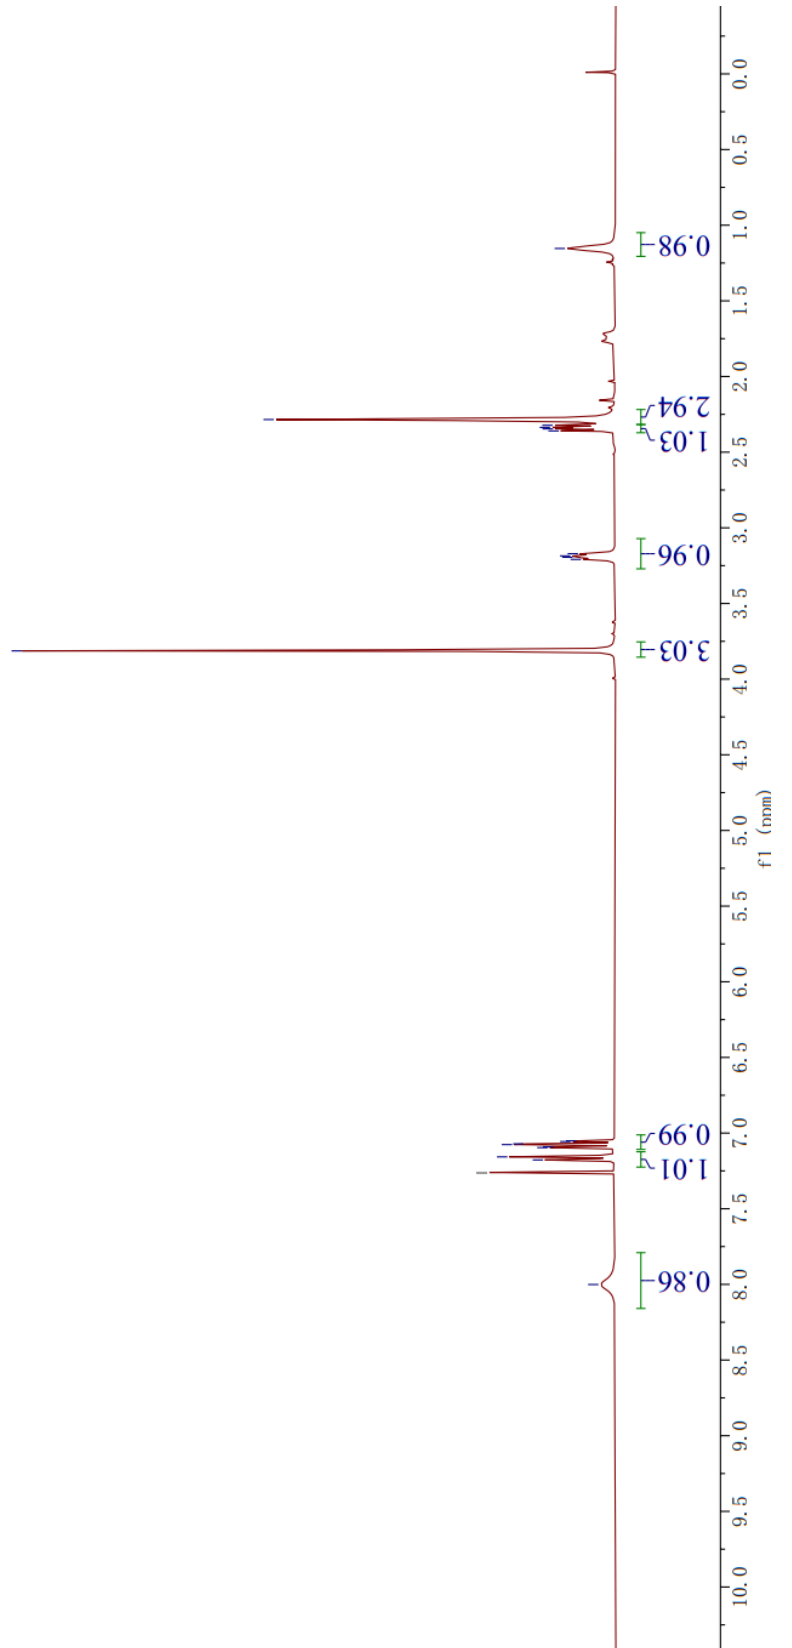

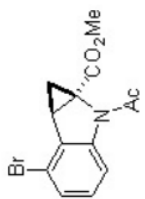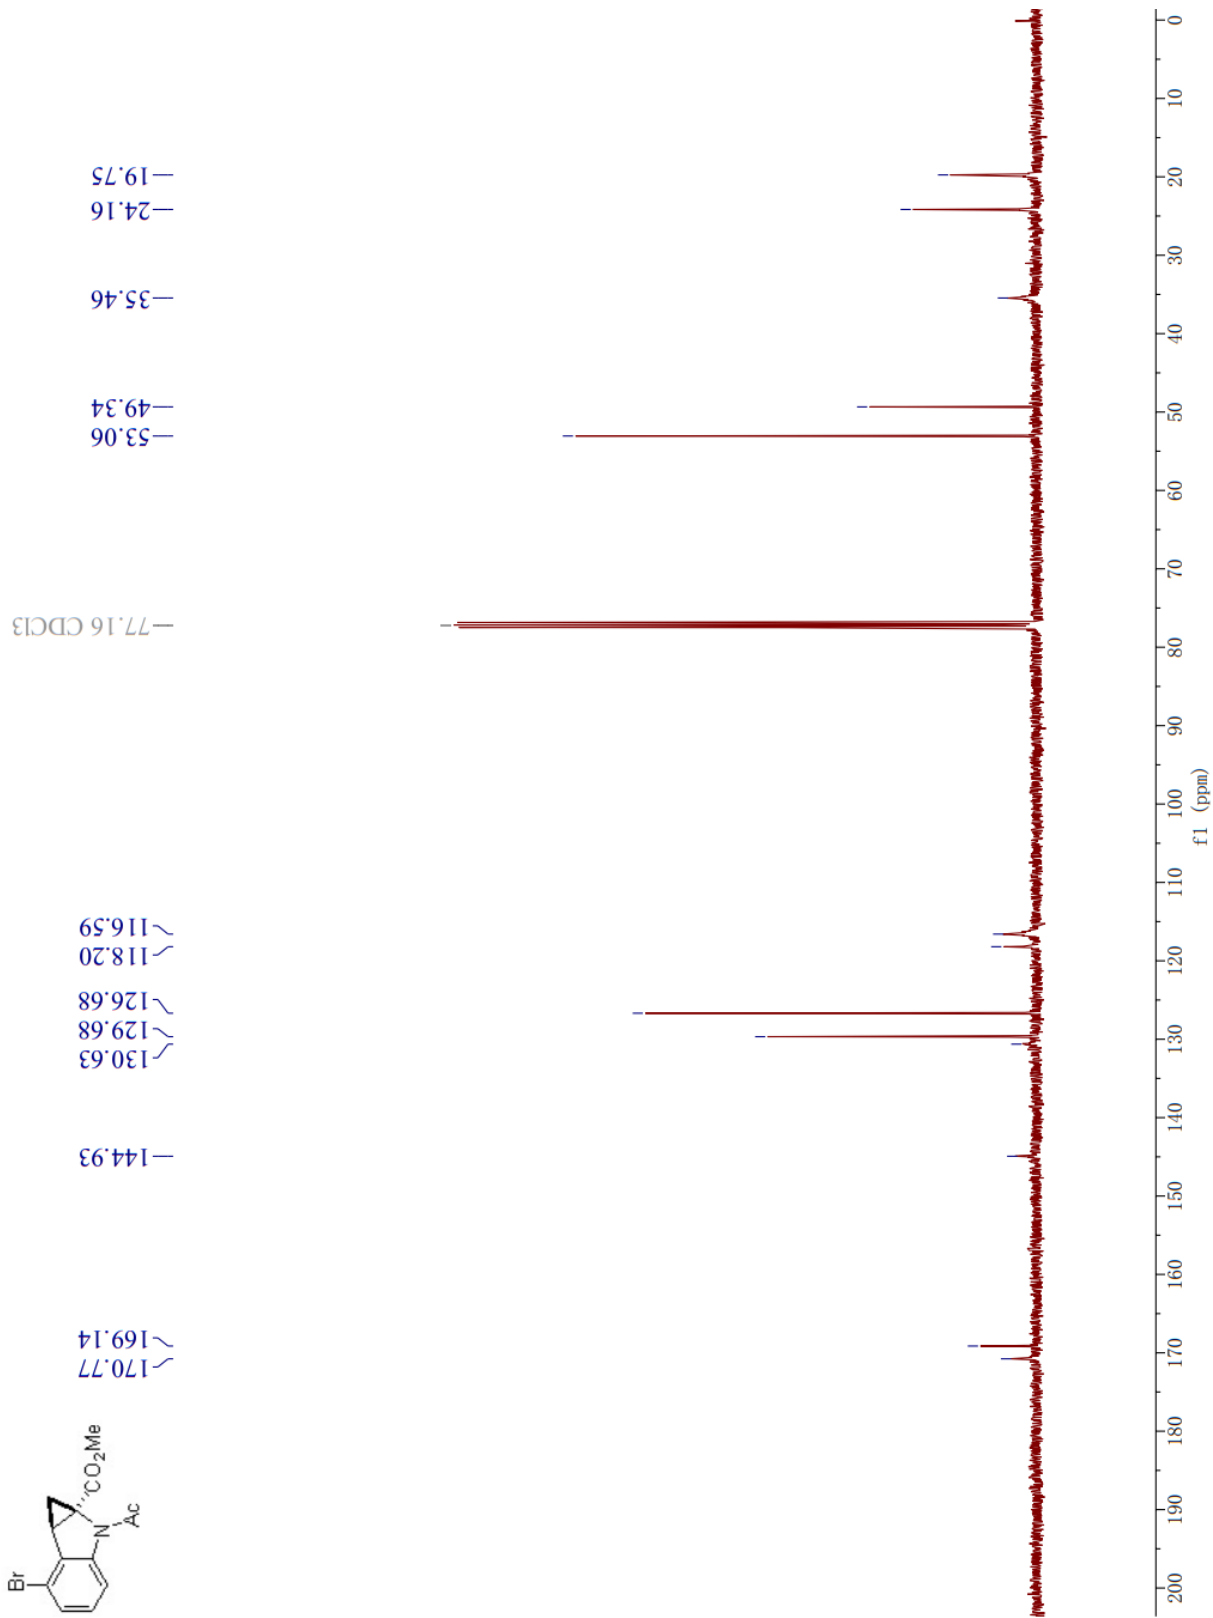

5k

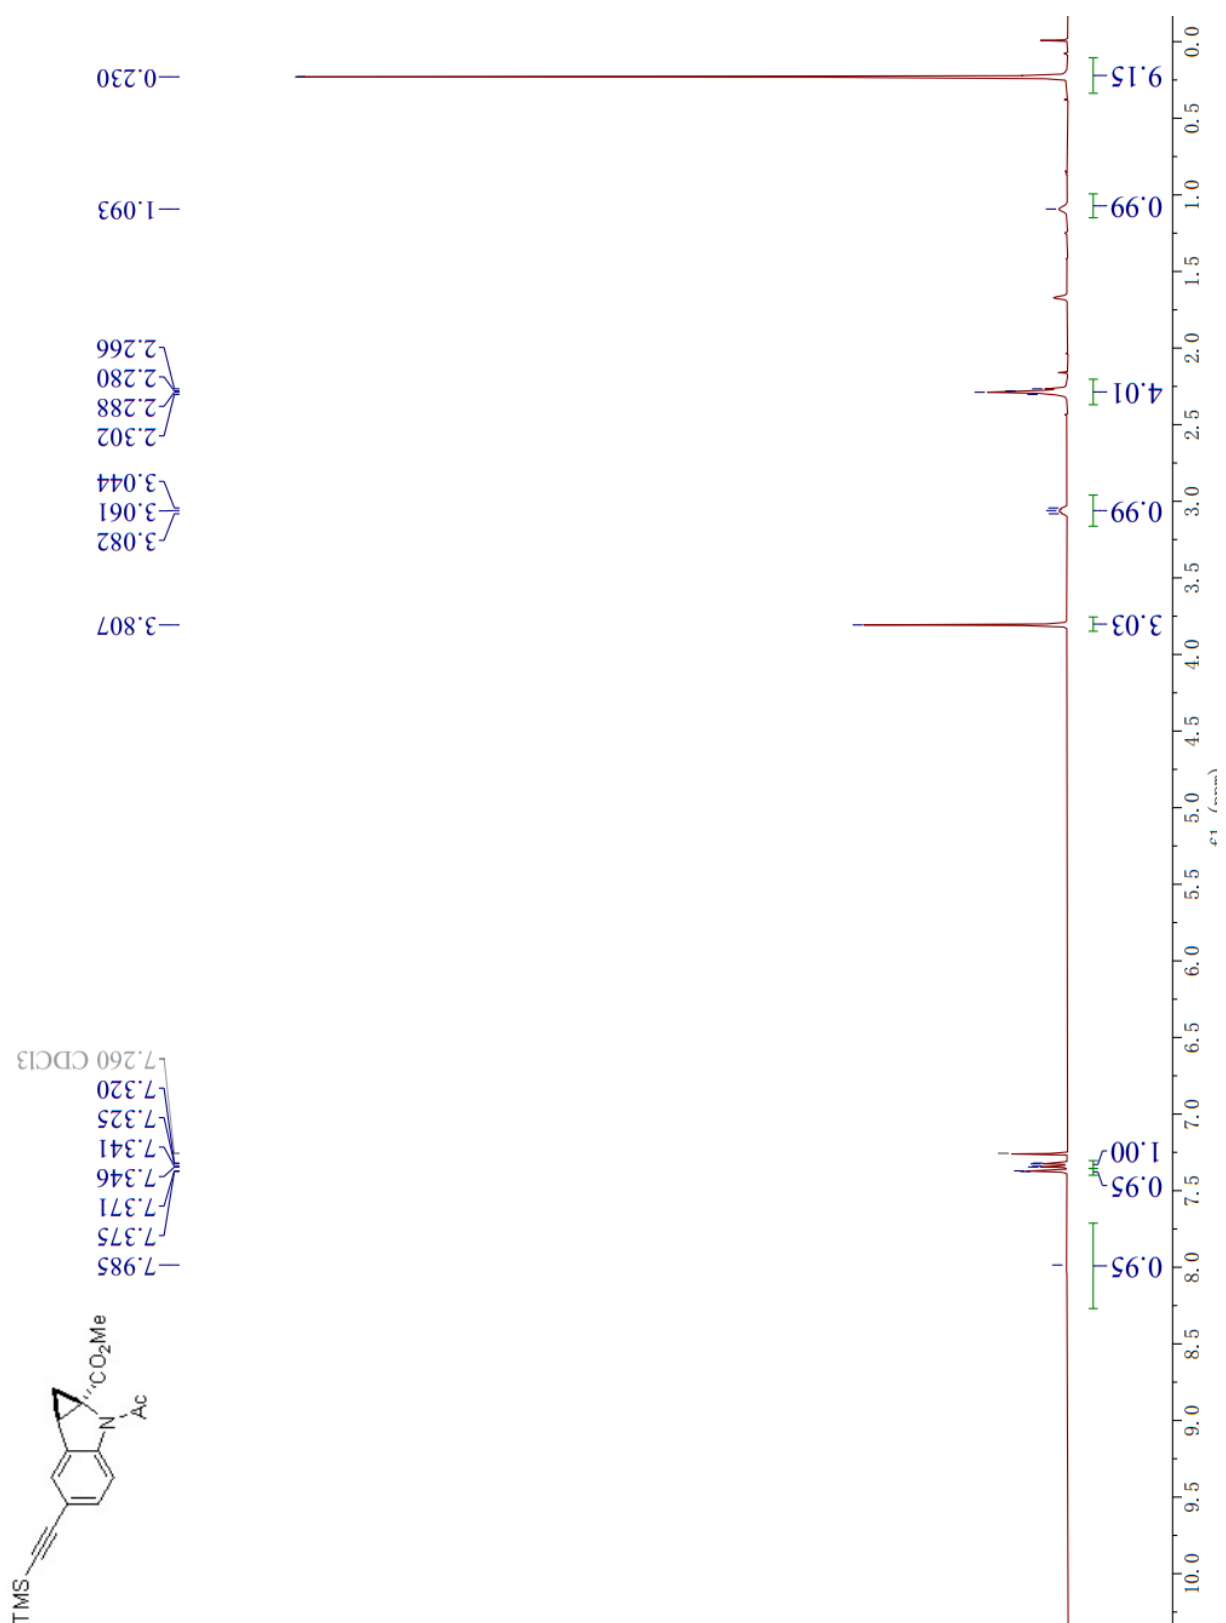

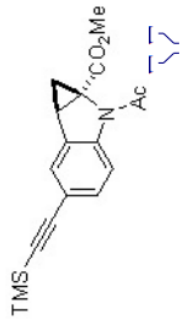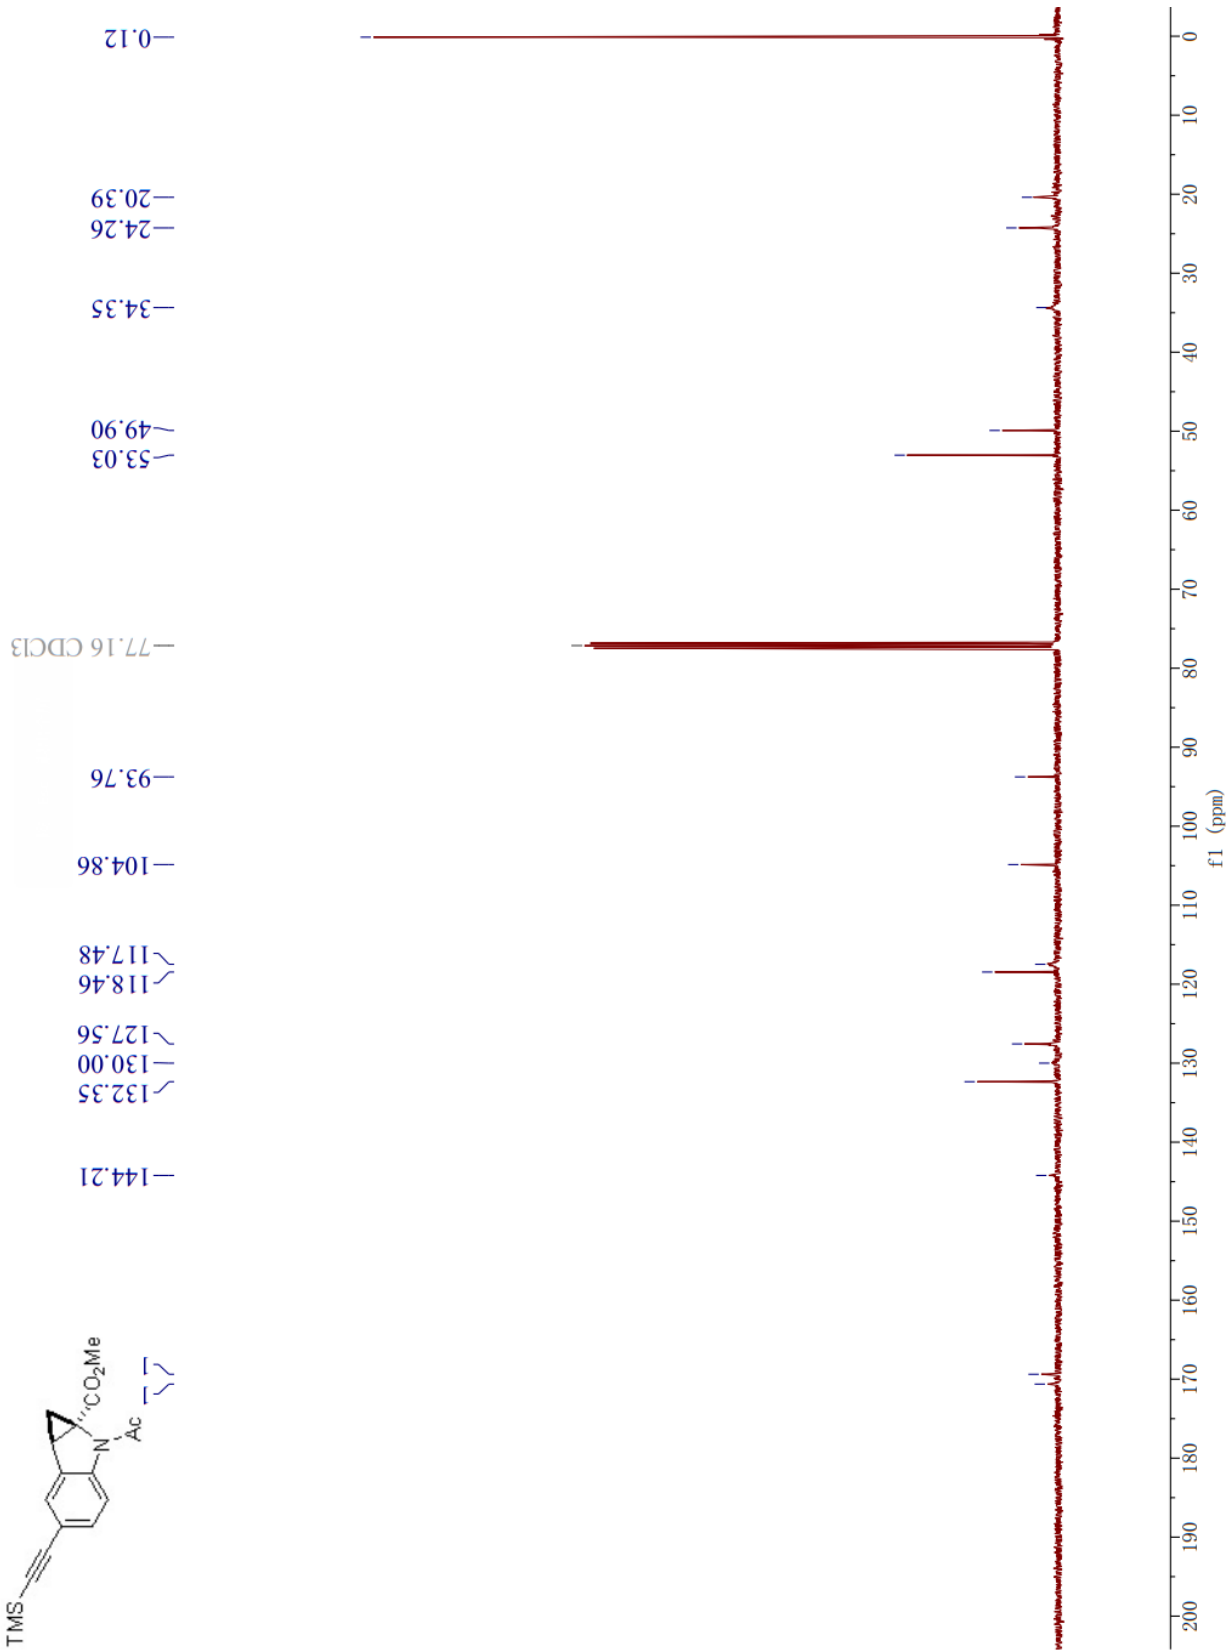

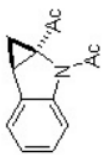

8.090  
7.287  
7.269  
7.260  
7.260 CDCl<sub>3</sub>  
7.252  
7.248  
7.232  
7.229  
7.212  
7.209  
7.061  
7.040  
7.022

2.979  
2.427  
2.414  
2.404  
2.391  
2.273  
2.236

1.139

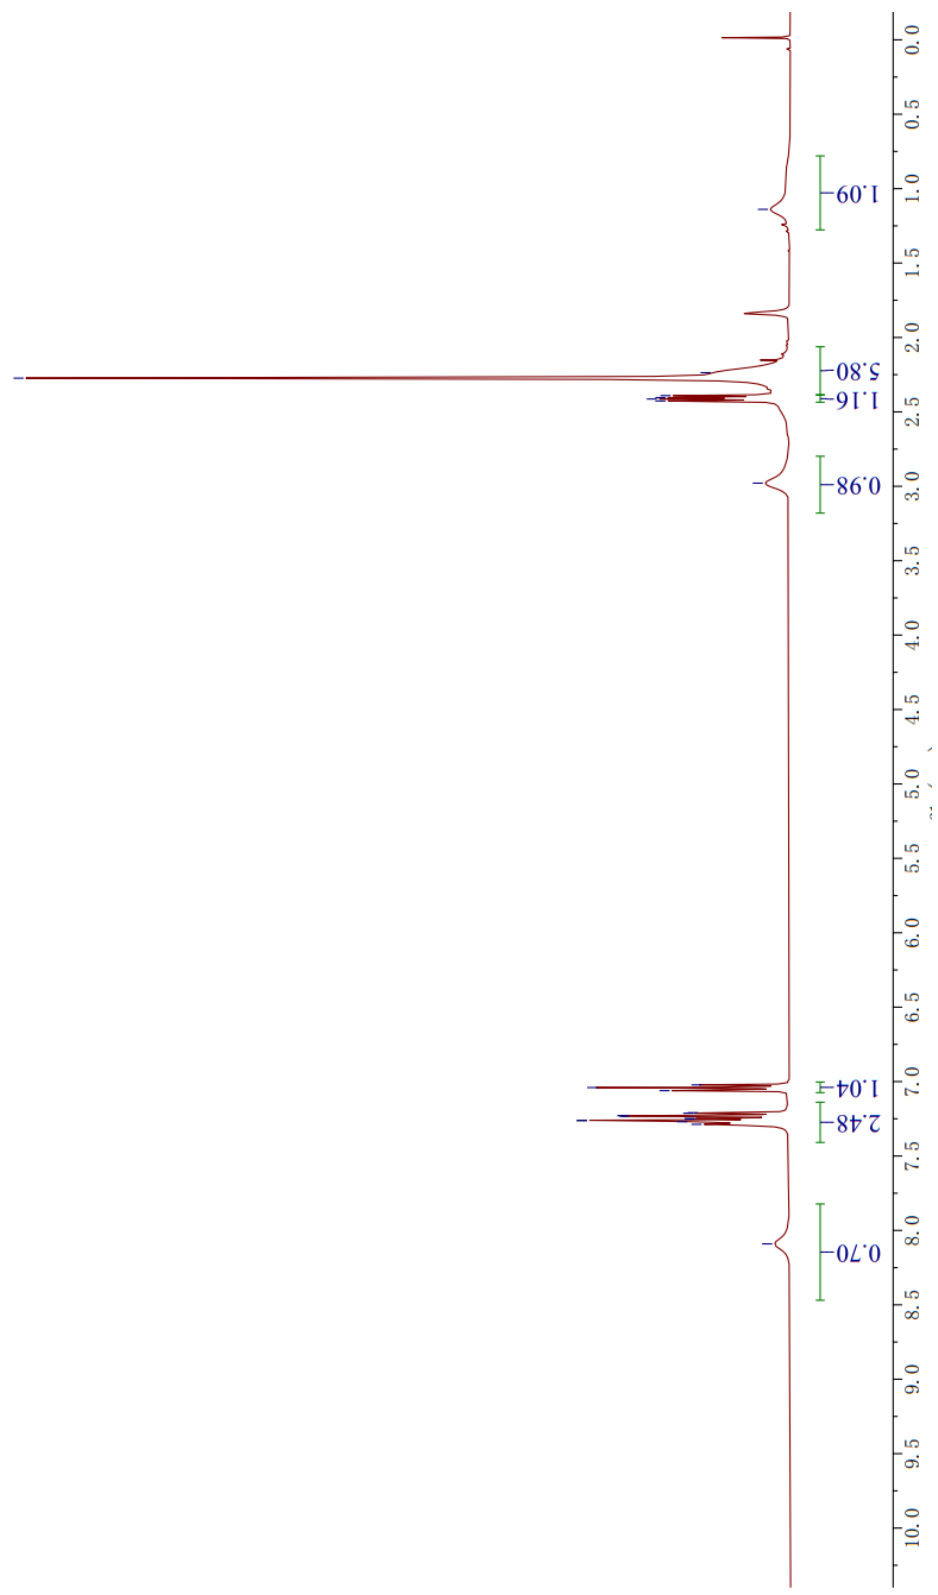

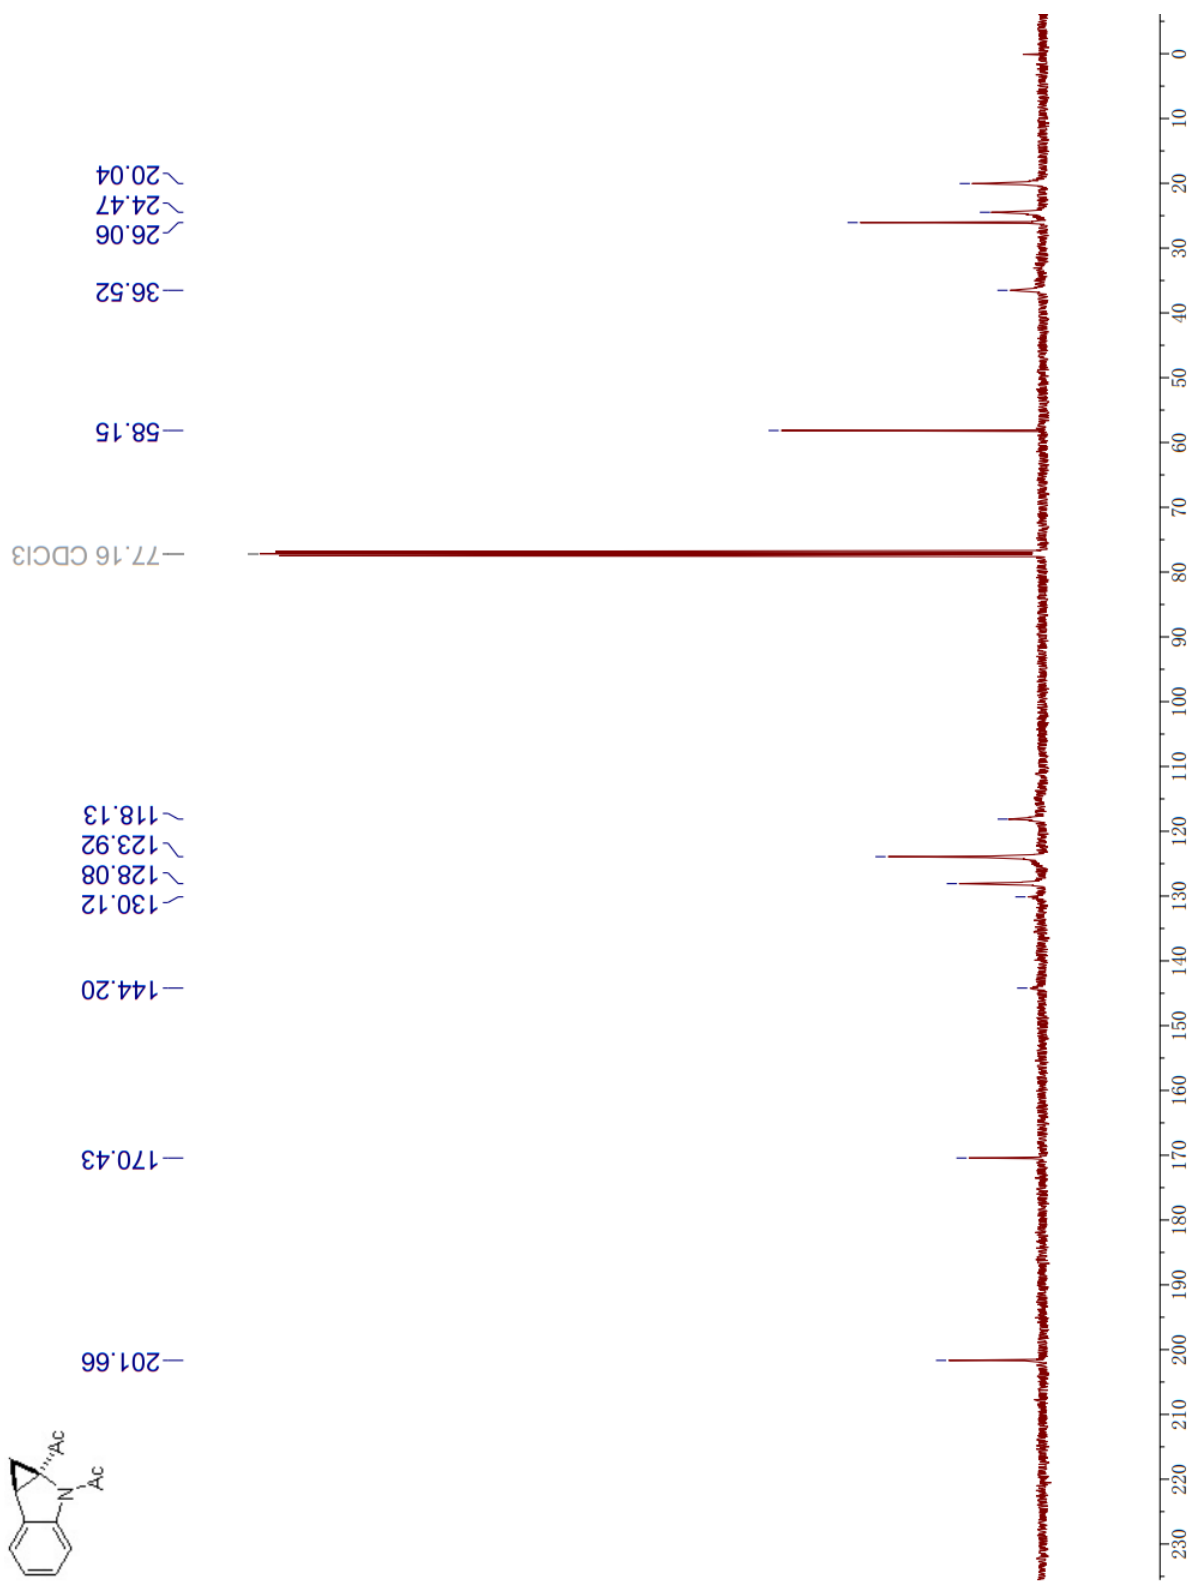

5m

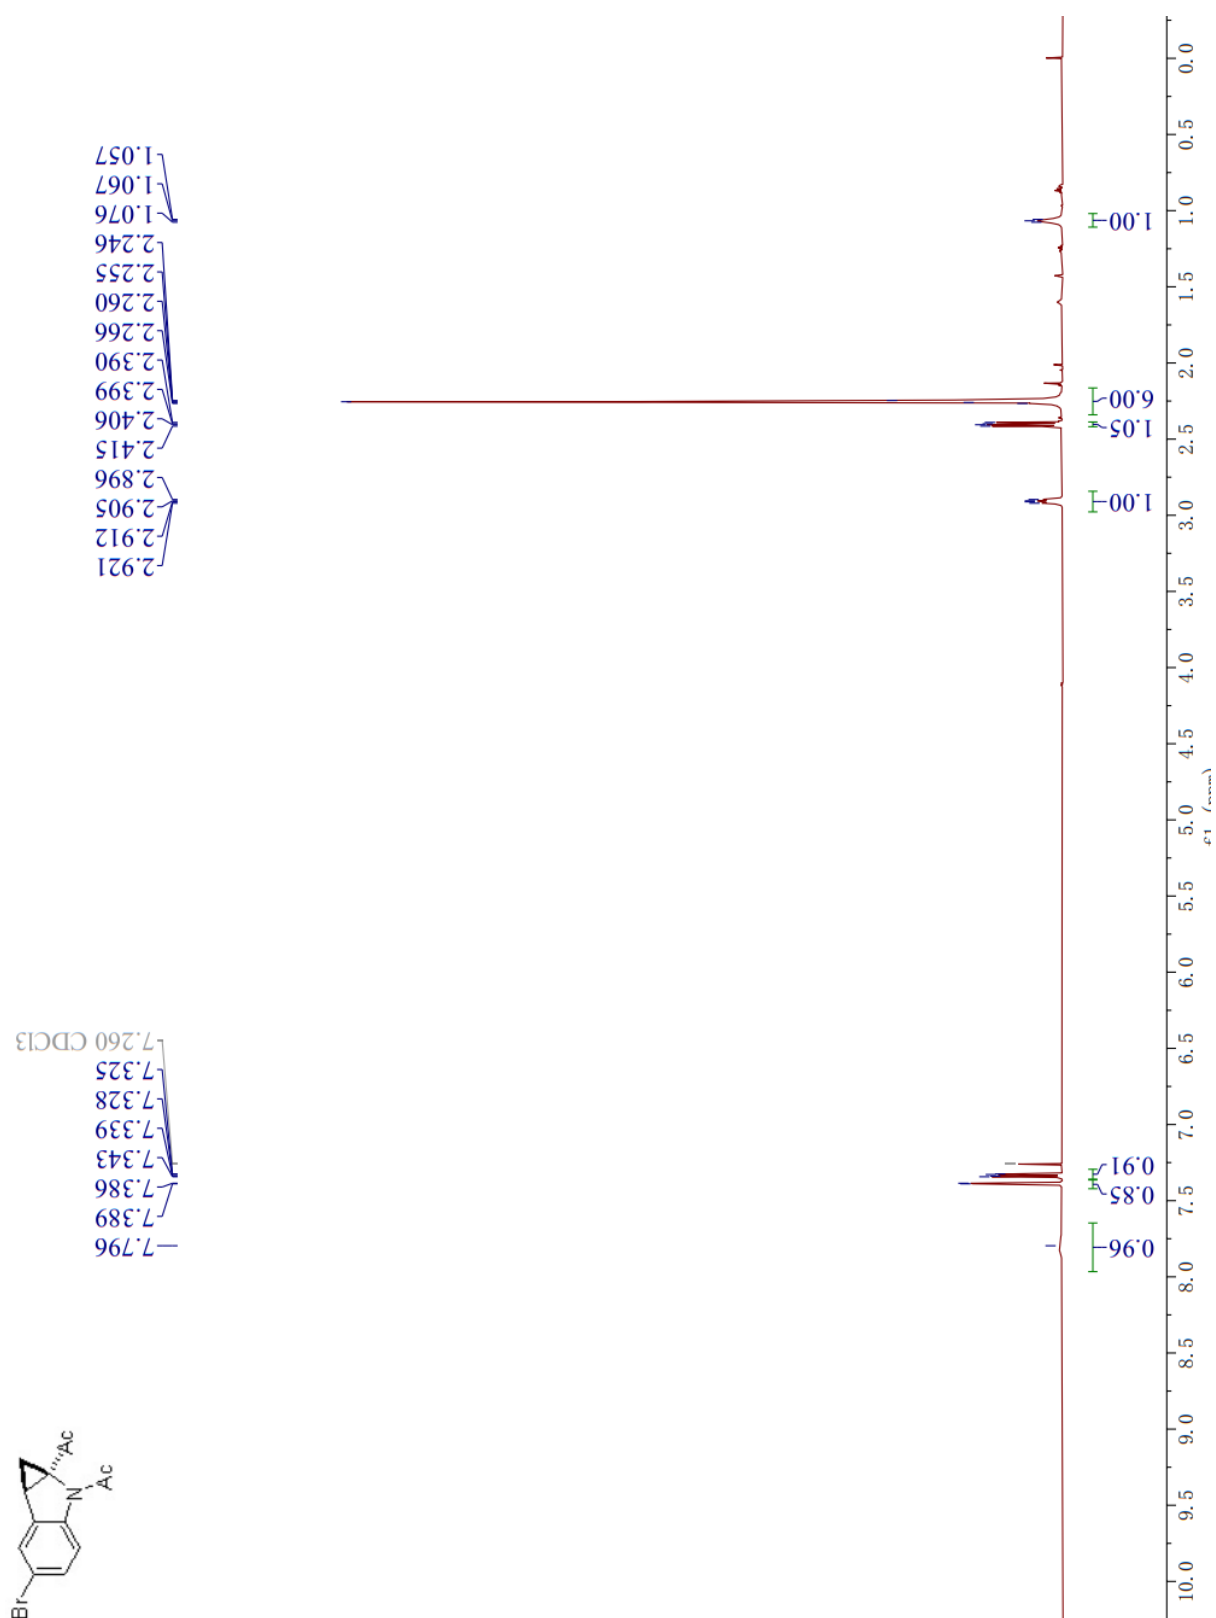



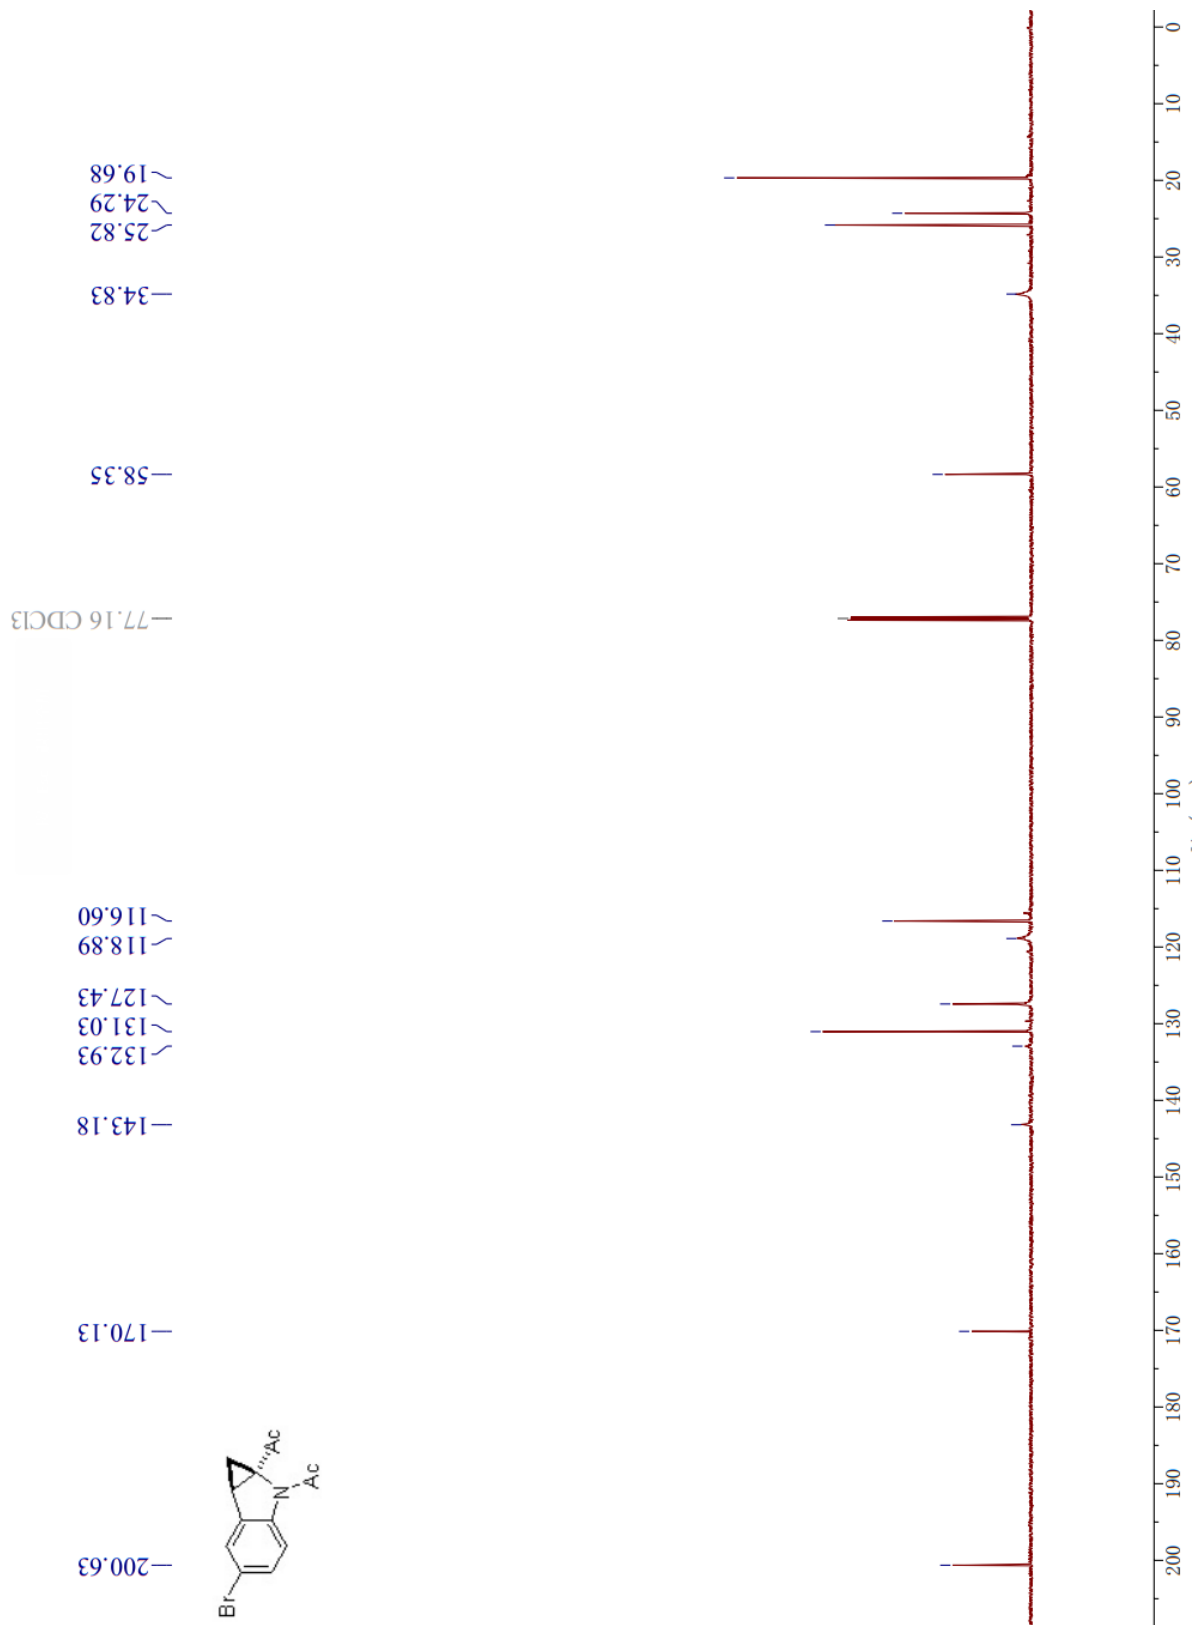

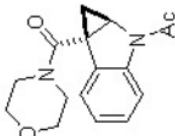

8.209  
8.189  
7.294  
7.284  
7.274  
7.256  
7.252  
7.236  
7.233  
7.083  
7.064  
7.045

4.216  
4.208  
4.199  
4.191  
3.690  
3.677  
3.666  
3.649  
3.594  
3.439  
3.345  
3.284  
3.272  
3.260  
2.409

1.763  
1.748  
1.733  
0.783  
0.776  
0.768  
0.761

—0.000 TMS

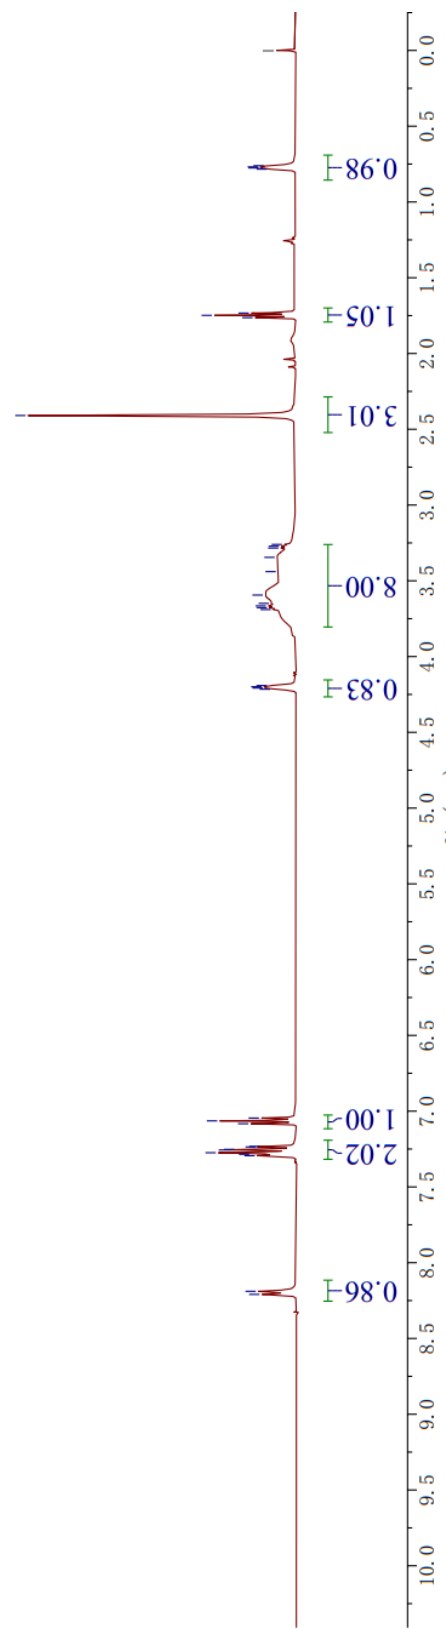

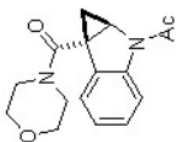

7

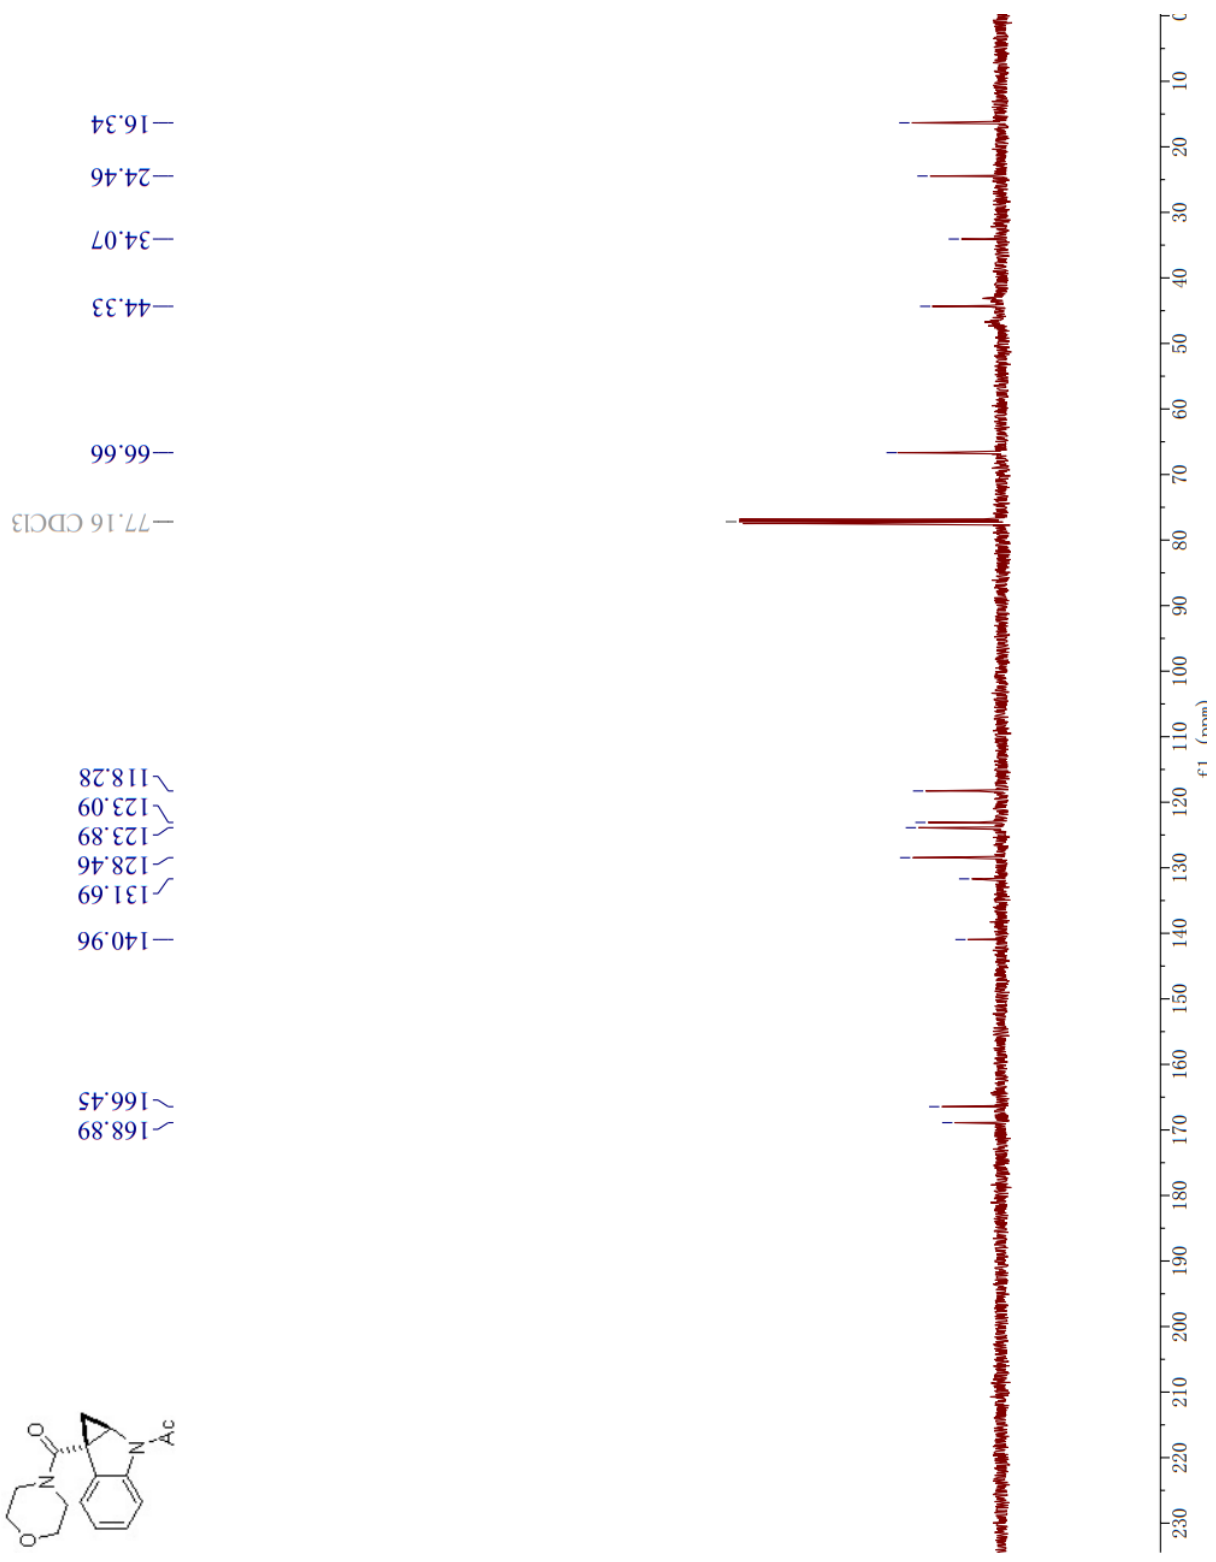

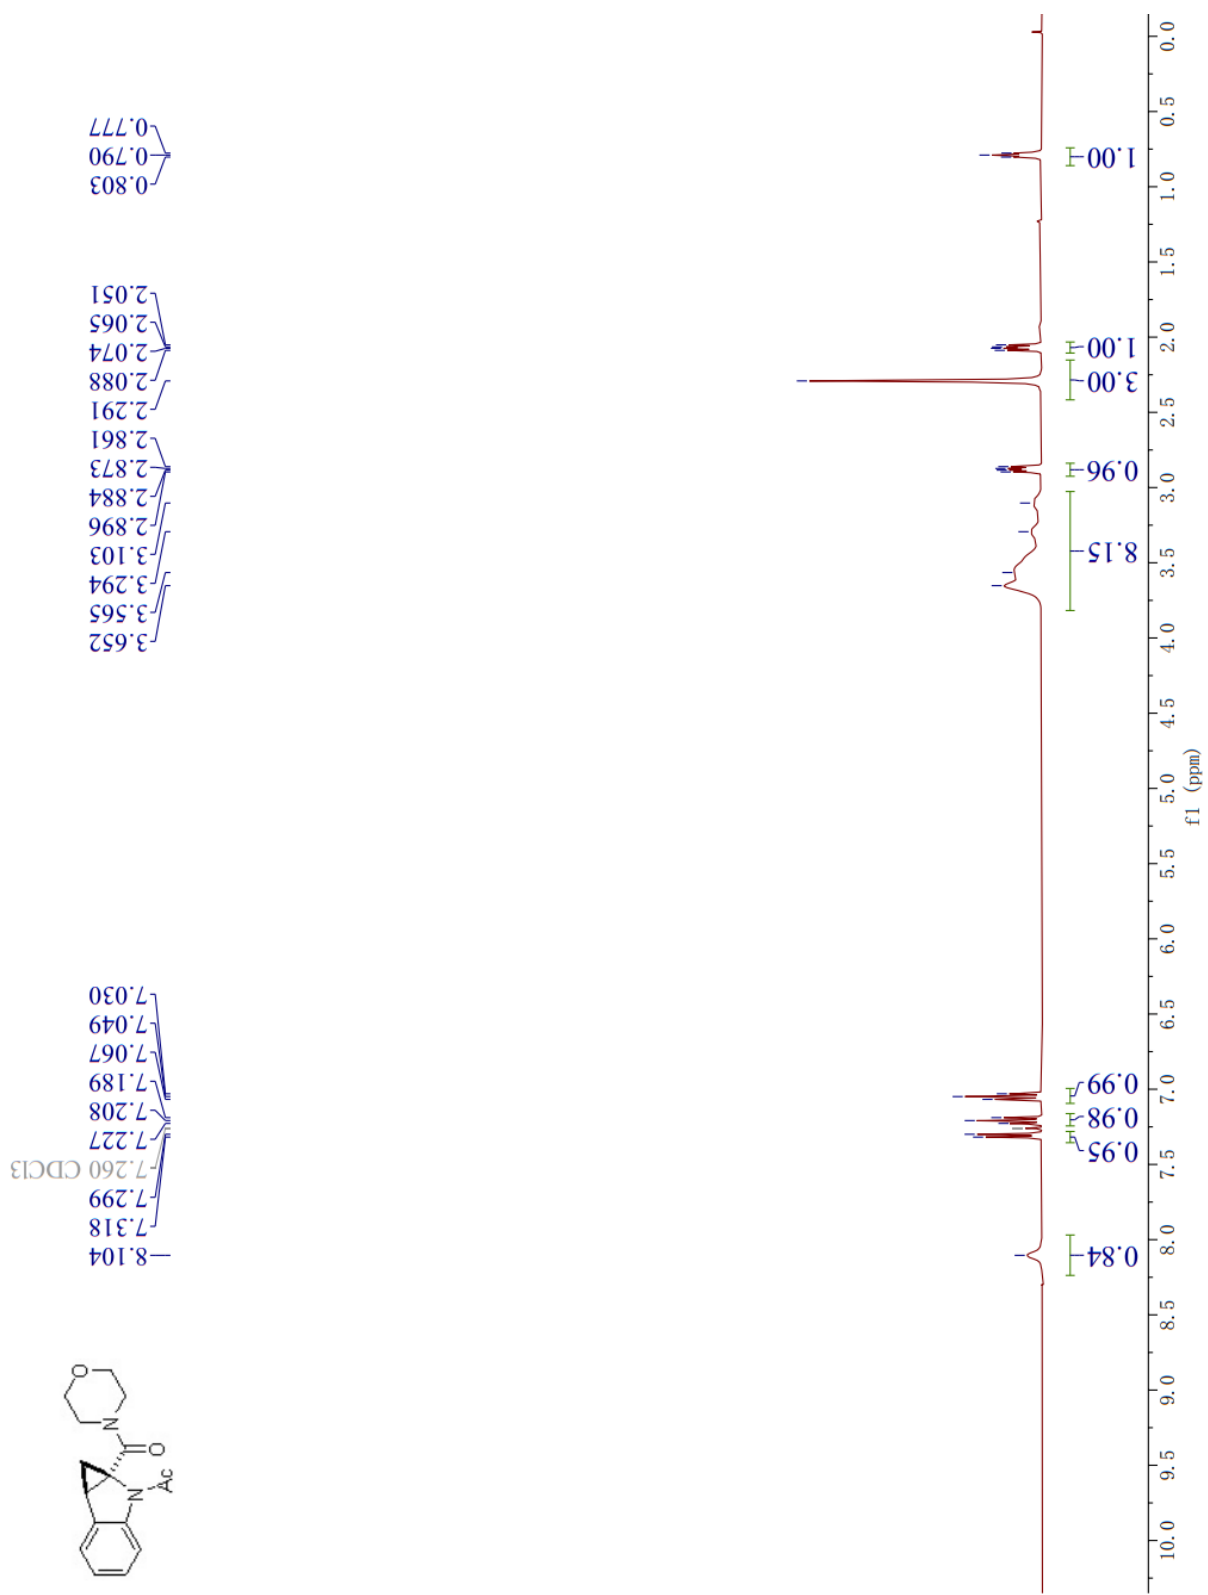

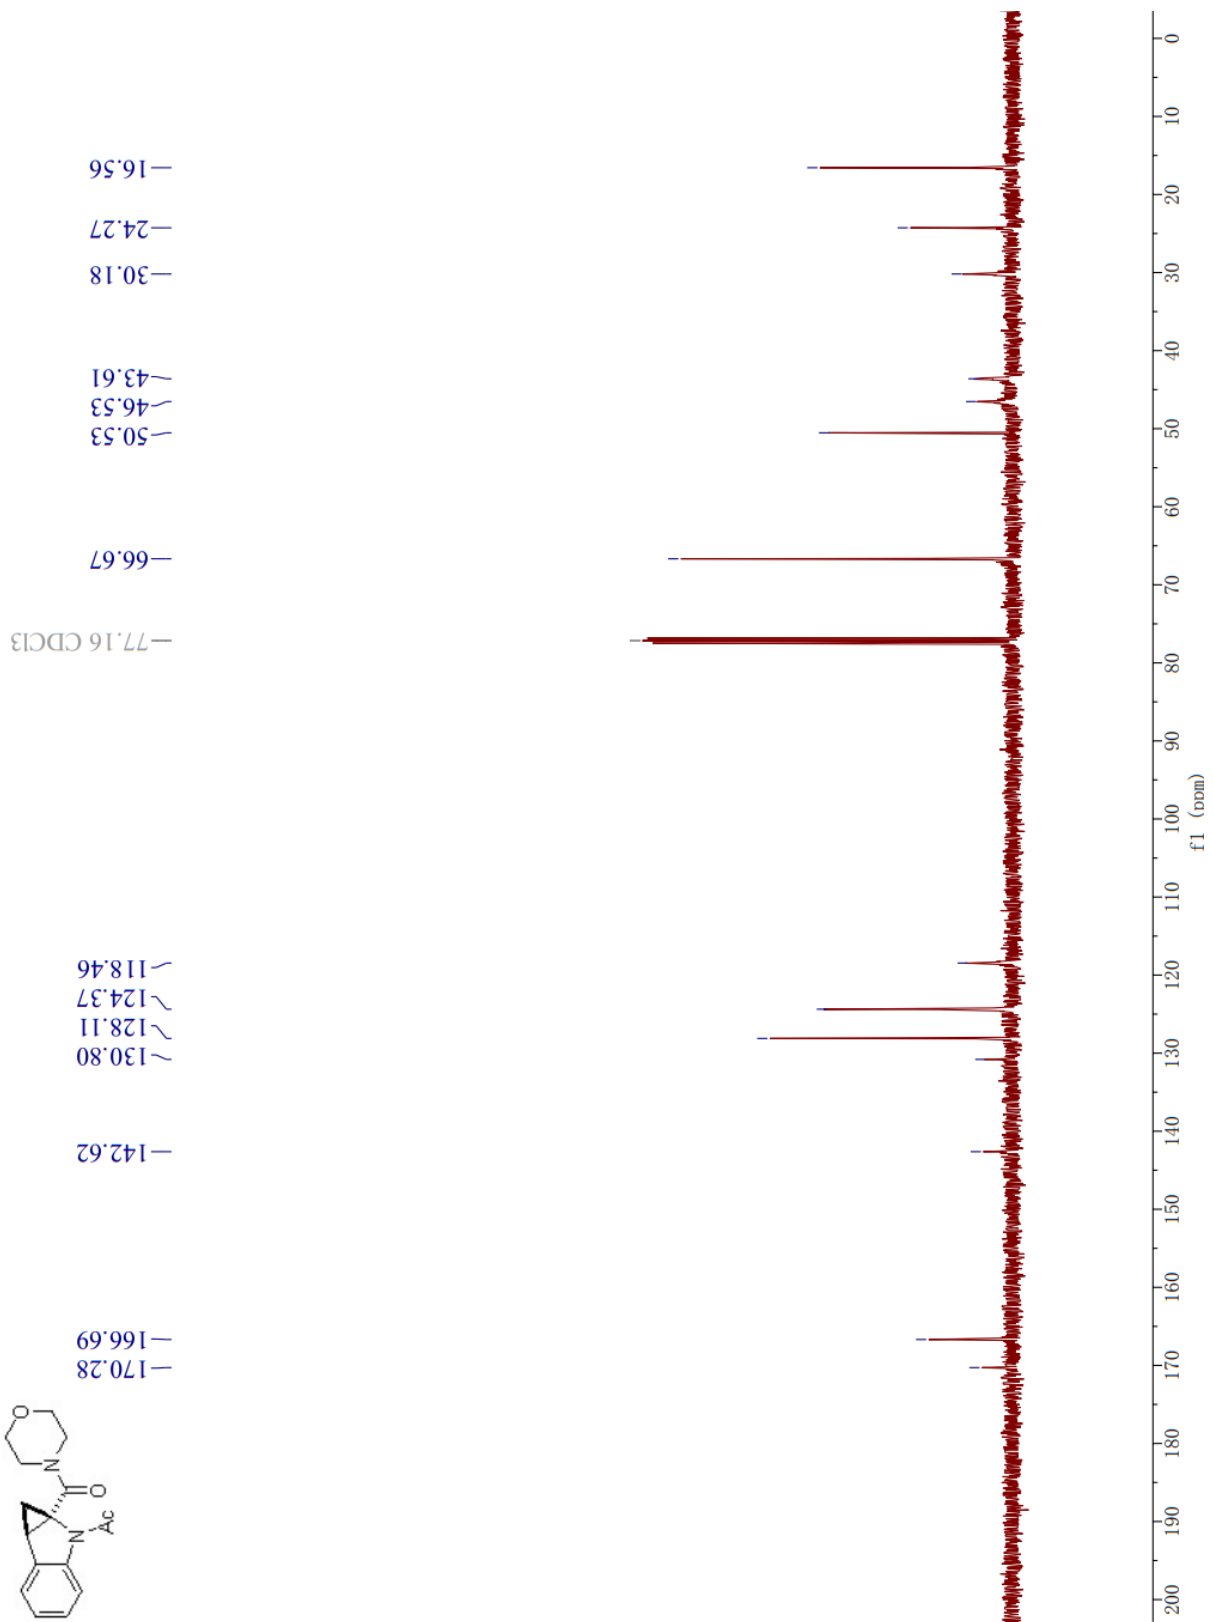

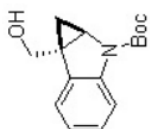

7.830  
7.424  
7.406  
7.260 CDCl<sub>3</sub>  
7.201  
7.182  
7.162  
7.012  
6.993  
6.975

4.172  
4.142  
3.888  
3.859

1.687  
1.646  
1.593  
1.189  
1.174  
1.159  
0.453  
0.446  
0.439  
0.432

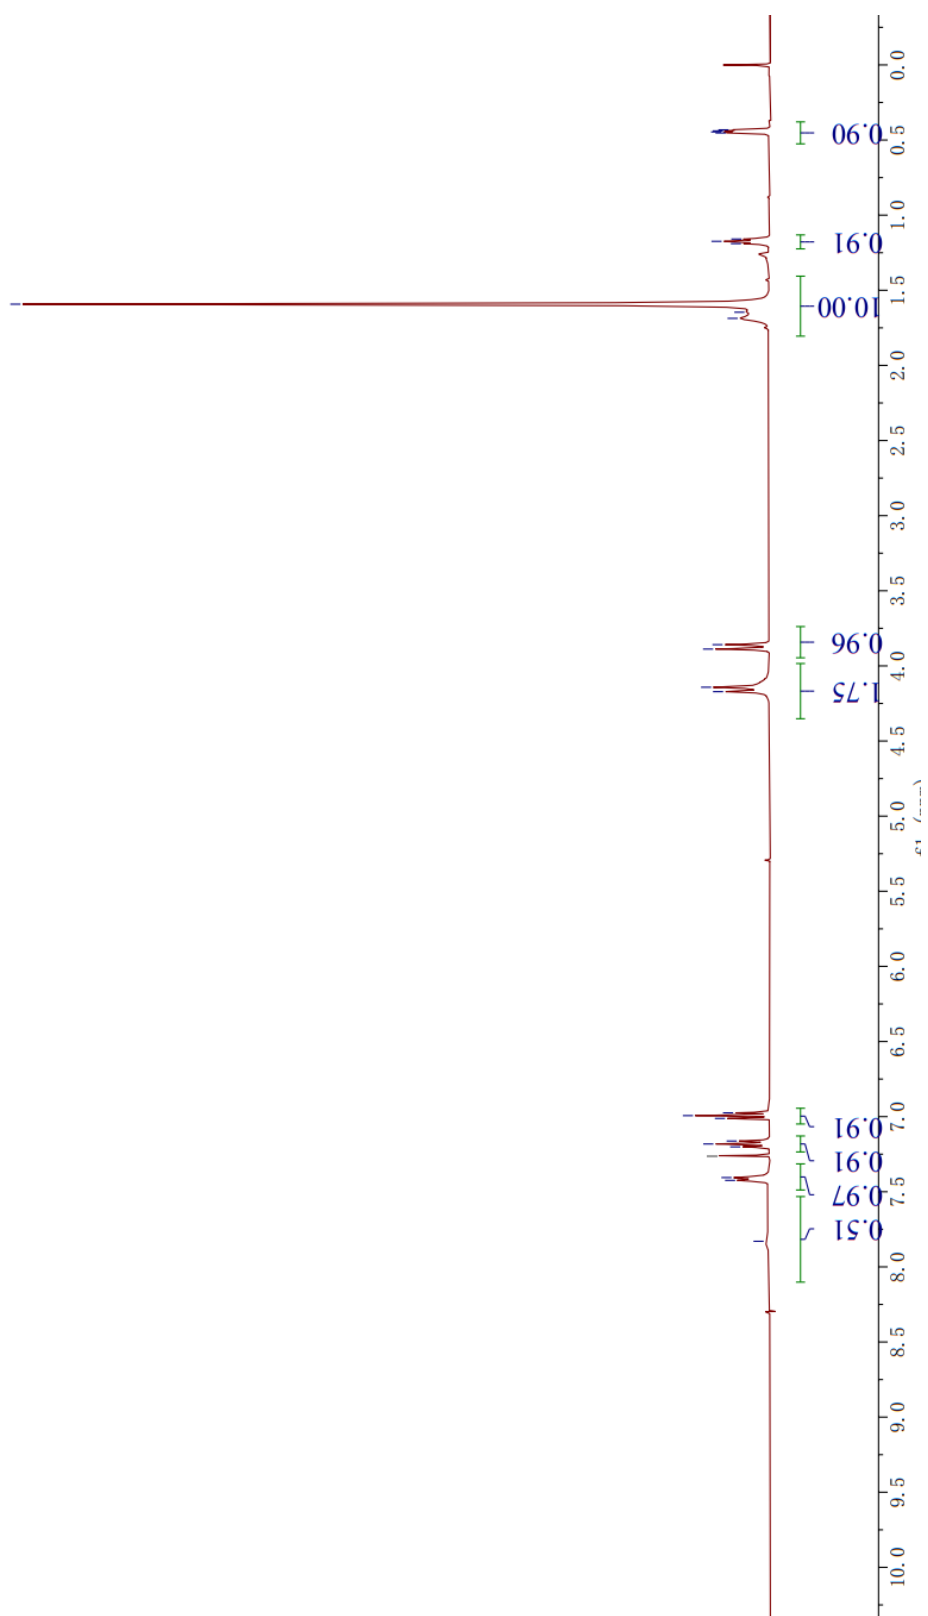

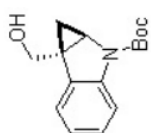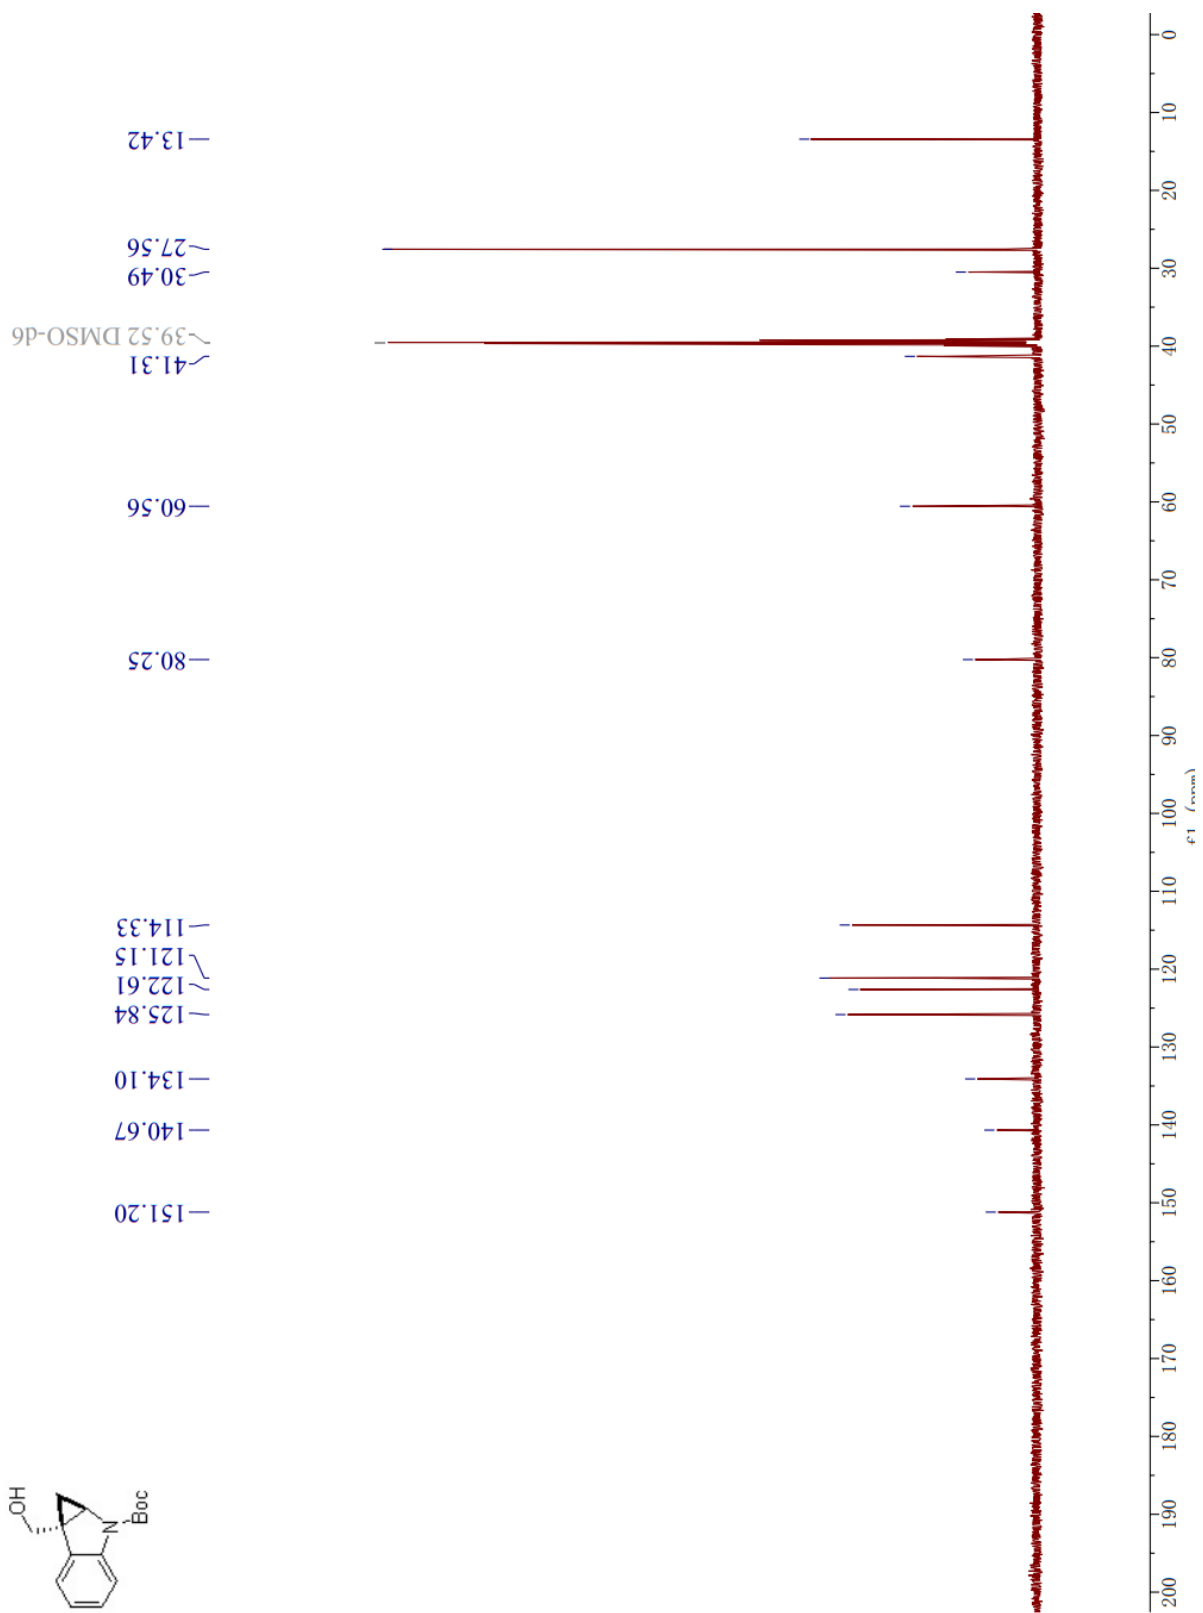

## 10. Copies of HPLC Spectra

8

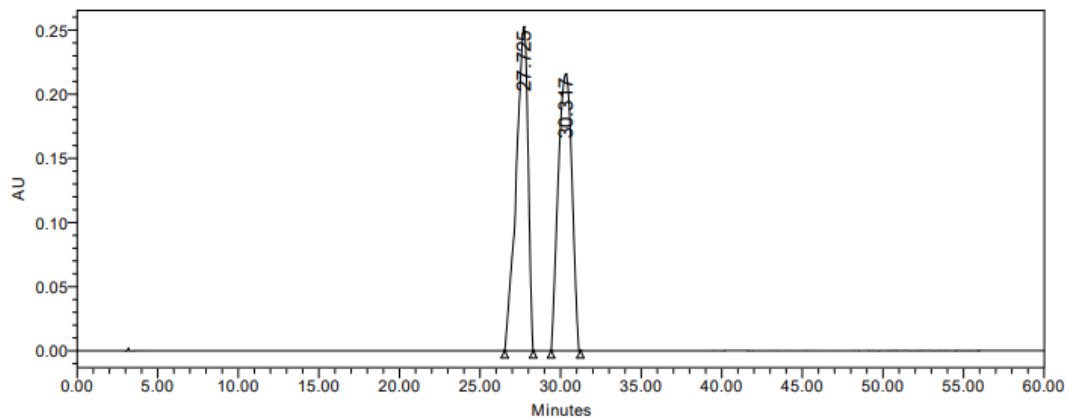

|   | RT     | Area     | % Area | Height |
|---|--------|----------|--------|--------|
| 1 | 27.725 | 12899465 | 50.22  | 252575 |
| 2 | 30.317 | 12785877 | 49.78  | 215809 |

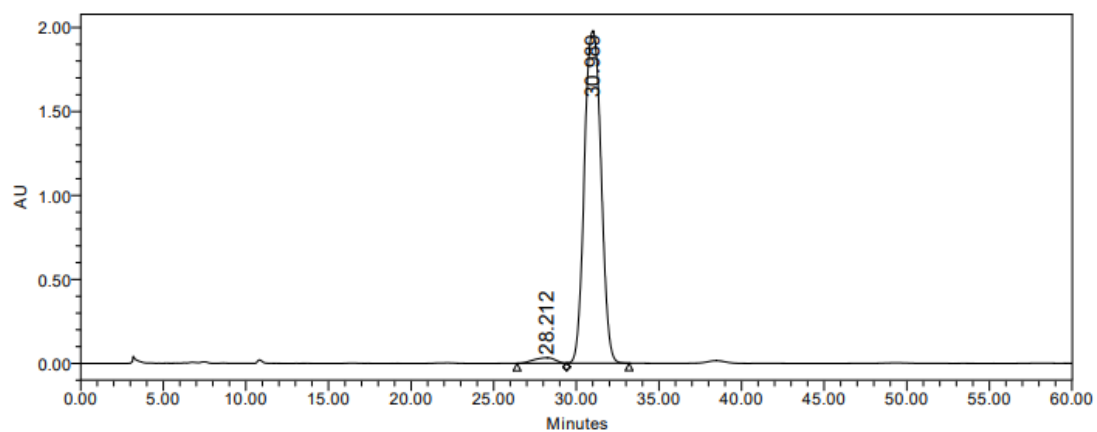

|   | RT     | Area      | % Area | Height  |
|---|--------|-----------|--------|---------|
| 1 | 28.212 | 2942125   | 2.08   | 32784   |
| 2 | 30.989 | 138709700 | 97.92  | 1977697 |
